# Supplementary material
Source: HighWire-hosted journal article supplement (http://www.annfammed.org/highwire/filestream/651/field_highwire_adjunct_files/0/Kendrick_Supp_App_Tables.pdf)
Supplement: Kendrick_Supp_App_Tables.pdf [file Kendrick_Supp_App_Tables.pdf]

**Supplemental materials for:**

Maund E, Stuart B, Moore M, et al. Managing antidepressant discontinuation: a systematic review. *Ann Fam Med*. 2019;17(1):52-60.

## Supplemental APPENDIX 1 - SEARCH STRATEGIES

### MEDLINE

Ovid MEDLINE(R) Epub Ahead of Print, In-Process & Other Non-Indexed Citations, Ovid MEDLINE(R) Daily and Ovid MEDLINE(R) 1946 to 23 March 2017

| Search ID# | Query                                                                                                                                                                                                                                                                                                                                                                                                                                                                                                                                                                                                                                                                                                                                                                                                                                                                                                                | Items found |
|------------|----------------------------------------------------------------------------------------------------------------------------------------------------------------------------------------------------------------------------------------------------------------------------------------------------------------------------------------------------------------------------------------------------------------------------------------------------------------------------------------------------------------------------------------------------------------------------------------------------------------------------------------------------------------------------------------------------------------------------------------------------------------------------------------------------------------------------------------------------------------------------------------------------------------------|-------------|
| 1          | exp ANTIDEPRESSIVE AGENTS/                                                                                                                                                                                                                                                                                                                                                                                                                                                                                                                                                                                                                                                                                                                                                                                                                                                                                           | 133782      |
| 2          | exp NEUROTRANSMITTER UPTAKE INHIBITORS/                                                                                                                                                                                                                                                                                                                                                                                                                                                                                                                                                                                                                                                                                                                                                                                                                                                                              | 133192      |
| 3          | (psychotropic* or antidepress* or anti depress* or ((serotonin or norepinephrine or noradrenaline or nor epinephrine or nor adrenaline or neurotransmitt* or dopamine*) and (uptake or reuptake or re-uptake)) or noradrenerg* or antiadrenergic or anti adrenergic or SSRI* or SNRI* or TCA* or tricyclic* or tetracyclic* or heterocyclic*).ti,kf,hw.                                                                                                                                                                                                                                                                                                                                                                                                                                                                                                                                                              | 136112      |
| 4          | (Agomelatine or Alaproclate or Alnespirone or Amoxapine or Amersergide or Amfebutamone or Amiflamine or Amineptine or Amitriptylin* or Amitriptylinoxide or Amoxapine or Aripiprazole or Atomoxetine or Tomoxetine or Befloxatone or Benactyzine or Binspirone or Brofaromine or Bupropion or Butriptylin* or Caroxazone or Chlopoxiten or Cianopramine or Cilobamine or Cilosamine or Cimoxatone or Citalopram or (Chlorimipramin* or Clomipramin* or Chlomipramin* or Clorimipramine) or Clorgyline or Clovoxamine or Dapoxetine or Deanol or Dibenzepin or Demexiptilin* or Deprenyl or Desipramine or Desvenlafaxine or Dibenzepin or Diclofensin* or Dimetacrin* or (Dosulepin or Dothiepin) or Doxepin or Duloxetine or DVS 233 or Enilospirone or Eptapirone or Escitalopram or Etoferidone or Femoxetine or Fenfluramin* or Fluotracen or Fluoxetine or Fluparoxan or Furazolidone or Fluvoxamine).ti,kf,hw. | 44215       |
| 5          | (Harmaline or Harmine or Hyperforin or Hypericum or John* Wort or Idazoxan or Imipramin* or Iprindole or Iproniazid* or Ipsapirone or Imipraminoxide or Isocarboxazid* or Lesopitron or Levomilnacipran or Lithium or Lofepramin* or (Lu AA21004 or Vortioxetine) or Lu AA24530 or LY2216684 or Maprotiline or Medifoxamine or Melitracen or Metapramine or Methylphenidate or Mianserin or Milnacipran or Minaprine or Mirtazapine or Moclobemide or Monocrotophos or Nefazodone or Nialamide or Nitroxazepine or Nomifensine or Norfenfluramine or Nortriptyline or Noxiptilin*).ti,kf,hw.                                                                                                                                                                                                                                                                                                                         | 67830       |
| 6          | (Opipramol or Oxflozane or Paroxetine or Phenelzine or Pheniprazine or Pipofezin* or Pirandamine or Piribedil or Pirlindole or Pivagabine or Pizotyline or Propizepine or (Protriptylin* or Pertofrane) or Quinupramine or Quipazine or Reboxetine or Ritanserin or Rolipram or Scopolamine or Selegiline or Sertraline or (Setiptiline or Teciptiline) or Tandospirone or Teniloxine or Tetrindole or Thiazesim or Thozalinone or Tianeptin* or Toloxatone or Tranylcypromine or Trazodone or Trimipramine or 5 Hydroxytryptophan or 5 HT or Tryptophan or Hydroxytryptophan or Venlafaxine or Viloxazine or Vilazodone or Viquiline or Zalospirone or Zimeldine).ti,kf,hw.                                                                                                                                                                                                                                         | 72802       |
| 7          | 1 or 2 or 3 or 4 or 5 or 6                                                                                                                                                                                                                                                                                                                                                                                                                                                                                                                                                                                                                                                                                                                                                                                                                                                                                           | 328279      |
| 8          | MOOD DISORDERS/ or DEPRESSIVE DISORDER/ or DEPRESSION, POSTPARTUM/ or DEPRESSIVE DISORDER, MAJOR/ or DEPRESSIVE DISORDER, TREATMENT-RESISTANT/                                                                                                                                                                                                                                                                                                                                                                                                                                                                                                                                                                                                                                                                                                                                                                       | 106670      |
| 9          | DEPRESSION/                                                                                                                                                                                                                                                                                                                                                                                                                                                                                                                                                                                                                                                                                                                                                                                                                                                                                                          | 95781       |
| 10         | ADJUSTMENT DISORDERS/                                                                                                                                                                                                                                                                                                                                                                                                                                                                                                                                                                                                                                                                                                                                                                                                                                                                                                | 4180        |
| 11         | (mixed anxiety adj2 depression).ti,ab,kf.                                                                                                                                                                                                                                                                                                                                                                                                                                                                                                                                                                                                                                                                                                                                                                                                                                                                            | 222         |
| 12         | (mixed anxiety adj2 depressive disorder).ti,ab,kf.                                                                                                                                                                                                                                                                                                                                                                                                                                                                                                                                                                                                                                                                                                                                                                                                                                                                   | 85          |
| 13         | 8 or 9 or 10 or 11 or 12                                                                                                                                                                                                                                                                                                                                                                                                                                                                                                                                                                                                                                                                                                                                                                                                                                                                                             | 195538      |
| 14         | (cease or cessation* or discontinu* or interrupt or interruption or taper* or reduce or drug holiday or post withdraw* or postwithdraw* or (stop* adj (taking or using)) or withdraw* or terminat* or deprescrib* or de prescrib* or deprescrip* or de                                                                                                                                                                                                                                                                                                                                                                                                                                                                                                                                                                                                                                                               | 909991      |

|    |                                                                                       |         |
|----|---------------------------------------------------------------------------------------|---------|
|    | prescrip*).ti,ab,kf.                                                                  |         |
| 15 | (prevent* adj3 relaps*).ti,ab,kf.                                                     | 8318    |
| 16 | (prevent* adj3 recurr*).ti,ab,kf.                                                     | 17925   |
| 17 | SECONDARY PREVENTION/                                                                 | 17455   |
| 18 | 14 or 15 or 16 or 17                                                                  | 943451  |
| 19 | controlled clinical trial.pt.                                                         | 93357   |
| 20 | randomized controlled trial.pt.                                                       | 456910  |
| 21 | (randomi#ed or randomi#ation).ti,ab.                                                  | 516857  |
| 22 | randomly.ab.                                                                          | 276324  |
| 23 | trial.ti,ab.                                                                          | 487920  |
| 24 | groups.ab.                                                                            | 1701672 |
| 25 | (control* adj3 (trial* or study or studies)).ti,ab.                                   | 422582  |
| 26 | RANDOMIZED CONTROLLED TRIAL/ or PRAGMATIC TRIAL/                                      | 457032  |
| 27 | (quasi adj (experimental or random\$)).ti,ab.                                         | 12796   |
| 28 | ((waitlist* or wait* list* or treatment as usual or TAU) adj3 (control or group)).ab. | 4446    |
| 29 | 19 or 20 or 21 or 22 or 23 or 24 or 25 or 26 or 27 or 28                              | 2645649 |
| 30 | EPIDEMIOLOGIC STUDIES/                                                                | 7454    |
| 31 | exp CASE CONTROL STUDIES/                                                             | 850134  |
| 32 | exp COHORT STUDIES/                                                                   | 1651640 |
| 33 | Case control.tw.                                                                      | 101281  |
| 34 | (cohort adj (study or studies)).tw.                                                   | 135409  |
| 35 | Cohort analy\$.tw.                                                                    | 5537    |
| 36 | (Follow up adj (study or studies)).tw.                                                | 43887   |
| 37 | (observational adj (study or studies)).tw.                                            | 71418   |
| 38 | Longitudinal.tw.                                                                      | 189339  |
| 39 | Retrospective.tw.                                                                     | 387610  |
| 40 | Cross sectional.tw.                                                                   | 249383  |
| 41 | CROSS-SECTIONAL STUDIES/                                                              | 239537  |
| 42 | 30 or 31 or 32 or 33 or 34 or 35 or 36 or 37 or 38 or 39 or 40 or 41                  | 2415411 |
| 43 | Case series.tw.                                                                       | 53257   |
| 44 | CASE REPORT/                                                                          | 1866965 |
| 45 | Case* report*.tw.                                                                     | 316198  |
| 46 | case* stud*.tw.                                                                       | 78415   |
| 47 | 43 or 44 or 45 or 46                                                                  | 2061422 |
| 48 | 29 or 42 or 47                                                                        | 6302954 |
| 49 | 7 and 13 and 18 and 48                                                                | 2967    |
| 50 | remove duplicates from 49                                                             | 2802    |
| 51 | (rodent* or rat or rats or mouse or mice or animal model*).ti.                        | 1271813 |
| 52 | (smoking or tobacco or nicotine).ti. or smoking cessation.mp.                         | 109483  |
| 53 | (antibiotic* or antimicrob* or antifung* or statin*).ti.                              | 155057  |
| 54 | (comment or editorial or meta-analysis or practice-guideline or review).pt.           | 3279247 |
| 55 | 51 or 52 or 53 or 54                                                                  | 4744048 |
| 56 | 50 not 55                                                                             | 2212    |

| Search ID# | Query                                                                                                                     | Items found |
|------------|---------------------------------------------------------------------------------------------------------------------------|-------------|
| #53        | Search (#47 NOT #52)                                                                                                      | 1162        |
| #52        | Search (#48 OR #49 OR #50 OR #51)                                                                                         | 4216683     |
| #51        | Search (((Editorial[PT] or Guideline[PT] or Meta-Analysis[PT] or Review[PT])))                                            | 2690893     |
| #50        | Search (((antibiotic*[TI] or antimicrob*[TI] or antifung*[TI] or statin*[TI])))                                           | 152759      |
| #49        | Search (((smoking[TI] or tobacco[TI] or nicotine[TI]) or smoking cessation[ALL]))                                         | 108342      |
| #48        | Search (((rodent*[TI] or rat[TI] or rats[TI] or mouse[TI] or mice[TI] or animal model*[TI] or rabbit[TI])))               | 1326349     |
| #47        | Search (#7 AND #12 AND #17 AND #46)                                                                                       | 1554        |
| #46        | Search (#29 OR #41 OR #45)                                                                                                | 6335149     |
| #45        | Search (#42 OR #43 OR #44)                                                                                                | 1869485     |
| #44        | Search Case reports [PT]                                                                                                  | 1825701     |
| #43        | Search Case reports[MESH:NOEXP]                                                                                           | 141         |
| #42        | Search Case series[TIAB]                                                                                                  | 52191       |
| #41        | Search (#30 OR #31 OR #32 OR #33 OR #34 OR #35 OR #36 OR #37 OR #38 OR #39 OR #40)                                        | 2281136     |
| #40        | Search Cross sectional[TIAB]                                                                                              | 243232      |
| #39        | Search Retrospective[TIAB]                                                                                                | 378173      |
| #38        | Search Longitudinal[TIAB]                                                                                                 | 185722      |
| #37        | Search (((observational study[TIAB] or observational studies[TIAB])))                                                     | 69599       |
| #36        | Search (((Follow up study[TIAB] or follow up studies[TIAB])))                                                             | 43627       |
| #35        | Search Cohort analy*[TIAB]                                                                                                | 5903        |
| #34        | Search (((cohort study[TIAB] or cohort studies[TIAB])))                                                                   | 132794      |
| #33        | Search Case control[TIAB]                                                                                                 | 99475       |
| #32        | Search cohort studies[MESH]                                                                                               | 1602115     |
| #31        | Search Case-control studies[MESH]                                                                                         | 826296      |
| #30        | Search Epidemiologic studies[MESH:NOEXP]                                                                                  | 7274        |
| #29        | Search (#18 OR #19 OR #20 OR #21 OR #22 OR #23 OR #24 OR #25 OR #26 OR #27 OR #28)                                        | 2968202     |
| #28        | Search (((waitlist*group [TIAB]or wait* list*group[TIAB] or treatment as usual group[TIAB] or TAU group[TIAB])))          | 582         |
| #27        | Search (((waitlist* control [TIAB]or wait* list*control[TIAB] or treatment as usual control[TIAB] or TAU control[TIAB]))) | 6811        |
| #26        | Search (((quasi experimental[TIAB] or quasi random*[TIAB])))                                                              | 12445       |
| #25        | Search ((RANDOMIZED CONTROLLED TRIAL[MESH:NOEXP] or PRAGMATIC CLINICAL TRIAL[MESH:NOEXP]))                                | 107877      |
| #24        | Search (((control* trial*[TIAB] or control* study[TIAB] or control* studies[TIAB])))                                      | 691375      |
| #23        | Search groups[TIAB]                                                                                                       | 1688863     |
| #22        | Search trial[TIAB]                                                                                                        | 459756      |
| #21        | Search Randomly [TIAB]                                                                                                    | 268179      |
| #20        | Search (((randomized[TIAB] or randomised[TIAB] or randomization[TIAB] or randomisation[TIAB])))                           | 490603      |
| #19        | Search randomized controlled trial [PT]                                                                                   | 430440      |
| #18        | Search controlled clinical trial [PT]                                                                                     | 516899      |
| #17        | Search (#13 OR #14 OR #15 OR #16)                                                                                         | 296571      |
| #16        | Search SECONDARY PREVENTION[MESH:NOEXP]                                                                                   | 16781       |

|     |                                                                                                                                                                                                                                                                                                                                                                                                                                                                                                                                                                                                                                                                                                                                                                                                                                                                                                                                                                                                                                                                                                                                                                                                                                                                                                  |        |
|-----|--------------------------------------------------------------------------------------------------------------------------------------------------------------------------------------------------------------------------------------------------------------------------------------------------------------------------------------------------------------------------------------------------------------------------------------------------------------------------------------------------------------------------------------------------------------------------------------------------------------------------------------------------------------------------------------------------------------------------------------------------------------------------------------------------------------------------------------------------------------------------------------------------------------------------------------------------------------------------------------------------------------------------------------------------------------------------------------------------------------------------------------------------------------------------------------------------------------------------------------------------------------------------------------------------|--------|
| #15 | Search (prevent* recur* [TIAB])                                                                                                                                                                                                                                                                                                                                                                                                                                                                                                                                                                                                                                                                                                                                                                                                                                                                                                                                                                                                                                                                                                                                                                                                                                                                  | 62250  |
| #14 | Search (prevent* relaps* [TIAB])                                                                                                                                                                                                                                                                                                                                                                                                                                                                                                                                                                                                                                                                                                                                                                                                                                                                                                                                                                                                                                                                                                                                                                                                                                                                 | 21759  |
| #13 | Search (((cease [TIAB] or cessation* [TIAB] or discontinu* [TIAB] or interrupt [TIAB] or interruption [TIAB] or taper* [TIAB] or reduce [TIAB] or drug holiday [TIAB] or post withdraw* [TIAB] or postwithdraw* [TIAB] or stop* taking [TIAB] stop* using [TIAB] or withdraw* [TIAB] or terminat* [TIAB] or deprescrib* [TIAB] or de prescrib* [TIAB] or deprescrip* [TIAB] or de prescrip* [TIAB])))                                                                                                                                                                                                                                                                                                                                                                                                                                                                                                                                                                                                                                                                                                                                                                                                                                                                                            | 210433 |
| #12 | Search (#8 OR #9 OR #10 OR #11)                                                                                                                                                                                                                                                                                                                                                                                                                                                                                                                                                                                                                                                                                                                                                                                                                                                                                                                                                                                                                                                                                                                                                                                                                                                                  | 189000 |
| #11 | Search mixed anxiety [TIAB]                                                                                                                                                                                                                                                                                                                                                                                                                                                                                                                                                                                                                                                                                                                                                                                                                                                                                                                                                                                                                                                                                                                                                                                                                                                                      | 358    |
| #10 | Search ADJUSTMENT DISORDERS[MESH:NOEXP]                                                                                                                                                                                                                                                                                                                                                                                                                                                                                                                                                                                                                                                                                                                                                                                                                                                                                                                                                                                                                                                                                                                                                                                                                                                          | 4057   |
| #9  | Search DEPRESSION [MESH:NOEXP]                                                                                                                                                                                                                                                                                                                                                                                                                                                                                                                                                                                                                                                                                                                                                                                                                                                                                                                                                                                                                                                                                                                                                                                                                                                                   | 151804 |
| #8  | Search ((MOOD DISORDERS[MESH:NOEXP] or DEPRESSIVE DISORDER[MESH:NOEXP] or DEPRESSION, POSTPARTUM [MESH:NOEXP] or DEPRESSIVE DISORDER, MAJOR [MESH:NOEXP] or DEPRESSIVE DISORDER, TREATMENT-RESISTANT [MESH:NOEXP]))                                                                                                                                                                                                                                                                                                                                                                                                                                                                                                                                                                                                                                                                                                                                                                                                                                                                                                                                                                                                                                                                              | 103027 |
| #7  | Search (#1 OR #2 OR #3 OR #4 OR #5 OR #6)                                                                                                                                                                                                                                                                                                                                                                                                                                                                                                                                                                                                                                                                                                                                                                                                                                                                                                                                                                                                                                                                                                                                                                                                                                                        | 321750 |
| #6  | Search (((Opipramol [TIAB] or Oxaflorane [TIAB] or Paroxetine[TIAB] or Phenelzine[TIAB] or Pheniprazine[TIAB] or Pipofezin* [TIAB] or Pirandamine [TIAB] or Piribedil[TIAB] or Pirlindole[TIAB] or Pivagabine[TIAB] or Pizotiline[TIAB] or Propizepine[TIAB] or (Protriptylin*[TIAB] or Pertofrane[TIAB]) or Quinupramine[TIAB] or Quipazine[TIAB] or Reboxetine[TIAB] or Ritanserin[TIAB] or Rolipram[TIAB] or Scopolamine[TIAB] or Selegiline[TIAB] or Sertraline[TIAB] or (Setiptiline[TIAB] or Teciptyline[TIAB]) or Tandospirone[TIAB] or Teniloxine[TIAB] or Tetrindole[TIAB] or Thiazesim[TIAB] or Thozalinone[TIAB] or Tianeptin*[TIAB] or Toloxatone[TIAB] or Tranylcypromine[TIAB] or Trazodone[TIAB] or Trimipramine[TIAB] or 5 Hydroxytryptophan[TIAB] or 5 HT[TIAB] or Tryptophan[TIAB] or Hydroxytryptophan[TIAB] or Venlafaxine[TIAB] or Viloxazine[TIAB] or Vilazodone[TIAB] or Viquiline[TIAB] or Zalospiroline[TIAB] or Zimeldine[TIAB])))                                                                                                                                                                                                                                                                                                                                     | 104458 |
| #5  | Search (((Harmaline[TIAB] or Harmine[TIAB] or Hyperforin[TIAB] or Hypericum[TIAB] or John* Wort [TIAB] or Idazoxan[TIAB] or Imipramin*[TIAB] or Iprindole[TIAB] or Iproniazid*[TIAB] or Ipsapirone[TIAB] or Imipraminoxide[TIAB] or Isocarboxazid*[TIAB] or Lesopitron[TIAB] or Levomilnacipran[TIAB] or Lithium[TIAB] or Lofepamin*[TIAB] or (Lu AA21004[TIAB] or Vortioxetine[TIAB]) or Lu AA24530 [TIAB] or LY2216684[TIAB] or Maprotiline[TIAB] or Medifoxamine[TIAB] or Melitracen[TIAB] or Metapramine[TIAB] or Methylphenidate[TIAB] or Mianserin[TIAB] or Milnacipran[TIAB] or Minaprine[TIAB] or Mirtazapine[TIAB] or Moclobemide[TIAB] or Monocrotophos[TIAB] or Nefazodone[TIAB] or Nialamide[TIAB] or Nitroxazepine[TIAB] or Nomifensine[TIAB] or Norfenfluramine[TIAB] or Nortriptyline[TIAB] or Noxiptilin*[TIAB])))                                                                                                                                                                                                                                                                                                                                                                                                                                                               | 68596  |
| #4  | Search (((Agomelatine[TIAB] or Alaproclate[TIAB] or Alnespiroline[TIAB] or Amoxapine[TIAB] or Amersergide[TIAB] or Amfebutamone[TIAB] or Amiflamine[TIAB] or Amineptine[TIAB] or Amitriptylin*[TIAB] or Amitriptylinoxide[TIAB] or Amoxapine[TIAB] or Aripiprazole [TIAB] or Atomoxetine[TIAB] or Tomoxetine[TIAB] or Befloxatone[TIAB] or Benactyzine[TIAB] or Binospirone[TIAB] or Brofaromine[TIAB] or Bupropion[TIAB] or Butriptylin*[TIAB] or Caroxazone[TIAB] or Chlopoxiten[TIAB] or Cianopramine[TIAB] or Cilobamine[TIAB] or Cilosamine[TIAB] or Cimoxatone[TIAB] or Citalopram[TIAB] or (Chlorimipramin*[TIAB] or Clomipramin*[TIAB] or Chlomipramin*[TIAB] or Clorimipramine[TIAB]) or Clorgyline[TIAB] or Clovoxamine[TIAB] or Dapoxetine[TIAB] or Deanol[TIAB] or Dibenzeptin[TIAB] or Demexiptilin*[TIAB] or Deprenyl [TIAB] or Desipramine[TIAB] or Desvenlafaxine[TIAB] or Dibenzeptin[TIAB] or Diclofensin*[TIAB] or Dimetacrin*[TIAB] or (Dosulepin[TIAB] or Dothiepin[TIAB]) or Doxepin[TIAB] or Duloxetine[TIAB] or DVS 233[TIAB] or Enilospirone [TIAB] or Eptapirone[TIAB] or Escitalopram[TIAB] or Etoferidone[TIAB] or Femoxetine[TIAB] or Fenfluramin*[TIAB] or Fluotracen [TIAB] or Fluoxetine[TIAB] or Fluparoxan[TIAB] or Furazolidone[TIAB] or Fluvoxamine[TIAB]))) | 46087  |
| #3  | Search (((psychotropic*[TIAB] or antidepress*[TIAB] or anti depress*[TIAB] or ((serotonin[TIAB] or norepinephrine[TIAB] or noradrenaline[TIAB] or nor epinephrine[TIAB] or nor adrenaline[TIAB] or neurotransmitt*[TIAB] or dopamine*[TIAB]))                                                                                                                                                                                                                                                                                                                                                                                                                                                                                                                                                                                                                                                                                                                                                                                                                                                                                                                                                                                                                                                    | 144261 |

|    |                                                                                                                                                                                                                                                |       |
|----|------------------------------------------------------------------------------------------------------------------------------------------------------------------------------------------------------------------------------------------------|-------|
|    | and (uptake[TIAB] or reuptake[TIAB] or re-uptake[TIAB])) or noradrenerg*[TIAB] or antiadrenergic[TIAB] or anti adrenergic[TIAB] or SSRI*[TIAB] or SNRI*[TIAB] or TCA*[TIAB] or tricyclic*[TIAB] or tetracyclic*[TIAB] or heterocyclic*[TIAB])) |       |
| #2 | Search NEUROTRANSMITTER UPTAKE INHIBITORS[MESH]                                                                                                                                                                                                | 25774 |
| #1 | Search ANTIDEPRESSIVE AGENTS[MESH]                                                                                                                                                                                                             | 52011 |

| Search ID# | Query                                                                                                                                                                                                                                                                                                                                                                                                                                                                                                                                                                                                                                                                                                                                                                                                                                                                                                                  | Items found |
|------------|------------------------------------------------------------------------------------------------------------------------------------------------------------------------------------------------------------------------------------------------------------------------------------------------------------------------------------------------------------------------------------------------------------------------------------------------------------------------------------------------------------------------------------------------------------------------------------------------------------------------------------------------------------------------------------------------------------------------------------------------------------------------------------------------------------------------------------------------------------------------------------------------------------------------|-------------|
| 1          | Psychopharmacology/                                                                                                                                                                                                                                                                                                                                                                                                                                                                                                                                                                                                                                                                                                                                                                                                                                                                                                    | 27419       |
| 2          | Psychotropic Agent/                                                                                                                                                                                                                                                                                                                                                                                                                                                                                                                                                                                                                                                                                                                                                                                                                                                                                                    | 28452       |
| 3          | exp Antidepressant Agent/                                                                                                                                                                                                                                                                                                                                                                                                                                                                                                                                                                                                                                                                                                                                                                                                                                                                                              | 376797      |
| 4          | Serotonin Receptor Affecting Agent/ or Serotonin Uptake Inhibitor/ or Serotonin Noradrenalin Reuptake Inhibitor/ or Triple Reuptake inhibitor/                                                                                                                                                                                                                                                                                                                                                                                                                                                                                                                                                                                                                                                                                                                                                                         | 48677       |
| 5          | Dopamine Receptor Affecting Agent/ or Dopamine Uptake Inhibitor/                                                                                                                                                                                                                                                                                                                                                                                                                                                                                                                                                                                                                                                                                                                                                                                                                                                       | 1521        |
| 6          | Adrenergic Receptor Affecting Agent/ or Noradrenalin Uptake Inhibitor/                                                                                                                                                                                                                                                                                                                                                                                                                                                                                                                                                                                                                                                                                                                                                                                                                                                 | 4222        |
| 7          | Neurotransmitter Uptake Inhibitors/                                                                                                                                                                                                                                                                                                                                                                                                                                                                                                                                                                                                                                                                                                                                                                                                                                                                                    | 160         |
| 8          | (antidepress* or anti depress* or ((serotonin or norepinephrine or noradrenaline or nor epinephrine or nor adrenaline or neurotransmitt* or dopamine*) and (uptake or reuptake or re-uptake)) or noradrenerg* or antiadrenergic or anti adrenergic or SSRI* or SNRI* or TCA* or tricyclic* or tetracyclic* or heterocyclic* or psychotropic*).mp.                                                                                                                                                                                                                                                                                                                                                                                                                                                                                                                                                                      | 293136      |
| 9          | (Agomelatine or Alaproclate or Alnespirone or Amoxapine or Amersergide or Amfebutamone or Amiflamine or Amineptine or Amitriptylin* or Amitriptylinoxide or Amoxapine or Aripiprazole or Atomoxetine or Tomoxetine or Befloxatone or Benactyzine or Binspirone or Brofaromine or Bupropion or Butriptylin* or Caroxazone or Chlopoxiten or Cianopramine or Cilobamine or Cilosamine or Cimoxatone or Citalopram or (Chlorimipramin* or Clomipramin* or Chlomipramin* or Clorimipramine) or Clorgyline or Clovoxamine or Dapoxetine or Deanol or Dibenzeppin or Demexiptilin* or Deprenyl or Desipramine or Desvenlafaxine or Dibenzeppin or Diclofensin* or Dimetacrin* or (Dosulepin or Dothiepin) or Doxepin or Duloxetine or DVS 233 or Enilospirone or Eptapirone or Escitalopram or Etoferidone or Femoxetine or Fenfluramin* or Fluotracen or Fluoxetine or Fluparoxan or Furazolidone or Fluvoxamine).ti,kw,hw. | 151125      |
| 10         | (Harmaline or Harmine or Hyperforin or Hypericum or John* Wort or Idazoxan or Imipramin* or Iprindole or Iproniazid* or Ipsapirone or Imipraminoxide or Isocarboxazid* or Lesopitron or Levomilnacipran or Lithium or Lofepamin* or (Lu AA21004 or Vortioxetine) or Lu AA24530 or LY2216684 or Maprotiline or Medifoxamine or Melitracen or Metapramine or Methylphenidate or Mianserin or Milnacipran or Minaprine or Mirtazapine or Moclobemide or Monocrotophos or Nefazodone or Nialamide or Nitroxazepine or Nomifensine or Norfenfluramine or Nortriptyline or Noxiptilin*).ti,kw,hw.                                                                                                                                                                                                                                                                                                                            | 164343      |
| 11         | (Opipramol or Oxaflazone or Paroxetine or Phenelzine or Pheniprazine or Pipofezin* or Pirandamine or Piribedil or Pirlindole or Pivagabine or Pizotiline or Propizepine or (Protriptylin* or Pertofrane) or Quinupramine or Quipazine or Reboxetine or Ritanserin or Rolipram or Scopolamine or Selegiline or Sertraline or (Setiptiline or Teciptiline) or Tandospirone or Teniloxine or Tetrindole or Thiazesim or Thozalinone or Tianeptin* or Toloxatone or Tranylcypromine or Trazodone or Trimipramine or 5 Hydroxytryptophan or 5 HT or Tryptophan or Hydroxytryptophan or Venlafaxine or Viloxazine or Vilazodone or Viquiline or Zalospiroline or Zimeldine).ti,kw,hw.                                                                                                                                                                                                                                        | 172971      |
| 12         | 1 or 2 or 3 or 4 or 5 or 6 or 7 or 8 or 9 or 10 or 11                                                                                                                                                                                                                                                                                                                                                                                                                                                                                                                                                                                                                                                                                                                                                                                                                                                                  | 663092      |
| 13         | DEPRESSION/ or AGITATED DEPRESSION/ or ATYPICAL DEPRESSION/ or ENDOGENOUS DEPRESSION/ or INVOLUTIONAL DEPRESSION/ or MAJOR DEPRESSION/ or MASKED DEPRESSION/ or MELANCHOLIA/ or ORGANIC DEPRESSION/ or PUERPERAL DEPRESSION/ or REACTIVE DEPRESSION/ or "mixed anxiety and depression"/                                                                                                                                                                                                                                                                                                                                                                                                                                                                                                                                                                                                                                | 355577      |
| 14         | (cease or cessation* or discontinu* or interrupt or interruption or taper* or reduce or drug holiday or post withdraw* or postwithdraw* or (stop* adj (taking or using)) or withdraw* or terminat* or deprescrib* or de prescrib* or deprescrip* or de prescrip*).ti,ab,kw.                                                                                                                                                                                                                                                                                                                                                                                                                                                                                                                                                                                                                                            | 985146      |
| 15         | (prevent* adj3 relaps*).ti,ab,kw.                                                                                                                                                                                                                                                                                                                                                                                                                                                                                                                                                                                                                                                                                                                                                                                                                                                                                      | 12176       |
| 16         | (prevent* adj3 recurr*).ti,ab,kw.                                                                                                                                                                                                                                                                                                                                                                                                                                                                                                                                                                                                                                                                                                                                                                                                                                                                                      | 24142       |
| 17         | secondary prevention/                                                                                                                                                                                                                                                                                                                                                                                                                                                                                                                                                                                                                                                                                                                                                                                                                                                                                                  | 26698       |

|    |                                                                      |         |
|----|----------------------------------------------------------------------|---------|
| 18 | 14 or 15 or 16 or 17                                                 | 1038745 |
| 19 | randomized controlled trial.de.                                      | 486141  |
| 20 | randomi#ed.ti,ab.                                                    | 678999  |
| 21 | randomly.ab.                                                         | 349380  |
| 22 | factorial\$.ti,ab.                                                   | 29959   |
| 23 | (control\$ adj3 (trial\$ or study or studies or group\$)).ti,ab.     | 1059738 |
| 24 | (quasi adj (experimental or random\$)).mp.                           | 15035   |
| 25 | 19 or 20 or 21 or 22 or 23 or 24                                     | 1745321 |
| 26 | Clinical study/                                                      | 285135  |
| 27 | case control study/                                                  | 127053  |
| 28 | Longitudinal study/                                                  | 110299  |
| 29 | Retrospective study/                                                 | 544323  |
| 30 | Prospective study/                                                   | 405475  |
| 31 | Cohort analysis/                                                     | 321284  |
| 32 | (Cohort adj (study or studies)).mp.                                  | 194800  |
| 33 | (Case control adj (study or studies)).tw.                            | 104374  |
| 34 | (follow up adj (study or studies)).tw.                               | 54788   |
| 35 | (observational adj (study or studies)).tw.                           | 107273  |
| 36 | (epidemiologic\$ adj (study or studies)).tw.                         | 91152   |
| 37 | (cross sectional adj (study or studies)).tw.                         | 138593  |
| 38 | 26 or 27 or 28 or 29 or 30 or 31 or 32 or 33 or 34 or 35 or 36 or 37 | 1930183 |
| 39 | exp case study/                                                      | 96920   |
| 40 | (case\$ and series).tw.                                              | 208351  |
| 41 | case report/                                                         | 2214717 |
| 42 | (case\$ adj2 report\$).tw.                                           | 617208  |
| 43 | (case\$ adj2 stud\$).tw.                                             | 249088  |
| 44 | 39 or 40 or 41 or 42 or 43                                           | 2705244 |
| 45 | 25 or 38 or 44                                                       | 5827853 |
| 46 | 12 and 13 and 18 and 45                                              | 3560    |
| 47 | remove duplicates from 46                                            | 3421    |
| 48 | (rodent* or rat or rats or mouse or mice or animal model*).ti.       | 1472370 |
| 49 | (smoking or tobacco or nicotine).ti. or smoking cessation.mp.        | 134529  |
| 50 | (antibiotic* or antimicrob* or antifung* or statin*).ti.             | 192464  |
| 51 | (book or editorial or review).pt.                                    | 2907167 |
| 52 | 48 or 49 or 50 or 51                                                 | 4636647 |
| 53 | 47 not 52                                                            | 2670    |

| Search ID# | Query                                                                                                                                                                                                                                                                                                                                                                                                                                                                                                                                                                                                                       | Items found |
|------------|-----------------------------------------------------------------------------------------------------------------------------------------------------------------------------------------------------------------------------------------------------------------------------------------------------------------------------------------------------------------------------------------------------------------------------------------------------------------------------------------------------------------------------------------------------------------------------------------------------------------------------|-------------|
| S47        | S40 NOT S46                                                                                                                                                                                                                                                                                                                                                                                                                                                                                                                                                                                                                 | 346         |
| S46        | S41 OR S42 OR S43 OR S44 OR S45                                                                                                                                                                                                                                                                                                                                                                                                                                                                                                                                                                                             | 295014      |
| S45        | TI (editorial or review or guideline)                                                                                                                                                                                                                                                                                                                                                                                                                                                                                                                                                                                       | 153362      |
| S44        | TI (rodent* or rat or rats or mouse or mice or animal model*)                                                                                                                                                                                                                                                                                                                                                                                                                                                                                                                                                               | 112419      |
| S43        | TI (smoking or tobacco or nicotine)                                                                                                                                                                                                                                                                                                                                                                                                                                                                                                                                                                                         | 27214       |
| S42        | smoking cessation                                                                                                                                                                                                                                                                                                                                                                                                                                                                                                                                                                                                           | 16116       |
| S41        | (TI (antibiotic* or antimicrob* or antifung* or statin*))                                                                                                                                                                                                                                                                                                                                                                                                                                                                                                                                                                   | 941         |
| S40        | S11 AND S15 AND S20 AND S39                                                                                                                                                                                                                                                                                                                                                                                                                                                                                                                                                                                                 | 396         |
| S39        | S27 OR S34 OR S38                                                                                                                                                                                                                                                                                                                                                                                                                                                                                                                                                                                                           | 22229       |
| S38        | S35 OR S36 OR S37                                                                                                                                                                                                                                                                                                                                                                                                                                                                                                                                                                                                           | 55044       |
| S37        | (TI (case N1 report*)) or (AB (case N1 report*)) or (KW (case N1 report*))                                                                                                                                                                                                                                                                                                                                                                                                                                                                                                                                                  | 42544       |
| S36        | DE "Case Report"                                                                                                                                                                                                                                                                                                                                                                                                                                                                                                                                                                                                            | 22681       |
| S35        | (TI (case N1 series) or (AB (case N1 series) or (KW (case N1 series)                                                                                                                                                                                                                                                                                                                                                                                                                                                                                                                                                        | 4044        |
| S34        | S28 OR S29 OR S30 OR S31 OR S32 OR S33                                                                                                                                                                                                                                                                                                                                                                                                                                                                                                                                                                                      | 73783       |
| S33        | (TI (cross sectional N1 (study or studies))) or (AB (cross sectional N1 (study or studies))) or (KW (cross sectional N1 (study or studies)))                                                                                                                                                                                                                                                                                                                                                                                                                                                                                | 22502       |
| S32        | (TI (follow up N1 (study or studies))) or (AB (follow up N1 (study or studies))) or (KW (follow up N1 (study or studies)))                                                                                                                                                                                                                                                                                                                                                                                                                                                                                                  | 12995       |
| S31        | (TI (cohort N1 (study or studies))) or (AB (cohort N1 (study or studies))) or (KW (cohort N1 (study or studies)))                                                                                                                                                                                                                                                                                                                                                                                                                                                                                                           | 17312       |
| S30        | (TI (case N1 control)) or (AB (case N1 control)) or (KW (case N1 control))                                                                                                                                                                                                                                                                                                                                                                                                                                                                                                                                                  | 10801       |
| S29        | (TI (observational N1 (study or studies))) or (AB (observational N1 (study or studies))) or (KW (observational N1 (study or studies)))                                                                                                                                                                                                                                                                                                                                                                                                                                                                                      | 904         |
| S28        | (TI (epidemiologic* N1 (study or studies))) or (AB (epidemiologic* N1 (study or studies))) or (KW (epidemiologic* N1 (study or studies)))                                                                                                                                                                                                                                                                                                                                                                                                                                                                                   | 12443       |
| S27        | S21 OR S22 OR S23 OR S24 OR S25 OR S26                                                                                                                                                                                                                                                                                                                                                                                                                                                                                                                                                                                      | 10595       |
| S26        | (AB (waitlist* or wait* list* or treatment as usual or TAU) N3 (control or group)))                                                                                                                                                                                                                                                                                                                                                                                                                                                                                                                                         | 5909        |
| S25        | (TI (quasi N1 (experimental OR randomi*)) or (AB (quasi N1 (experimental OR randomi*)))                                                                                                                                                                                                                                                                                                                                                                                                                                                                                                                                     | 85          |
| S24        | (TI (control* N3 (trial* or study or studies)) or (AB (control* N3 (trial* or study or studies)))                                                                                                                                                                                                                                                                                                                                                                                                                                                                                                                           | 72623       |
| S23        | (TI (controlled N1 trial*)) or (AB (controlled N1 trial*))                                                                                                                                                                                                                                                                                                                                                                                                                                                                                                                                                                  | 32638       |
| S22        | (TI (randomi* control* trial*)) or (AB (randomi* control* trial*))                                                                                                                                                                                                                                                                                                                                                                                                                                                                                                                                                          | 33209       |
| S21        | (TI (clinic* N1 trial*)) OR (AB (clinic* N1 trial*))                                                                                                                                                                                                                                                                                                                                                                                                                                                                                                                                                                        | 26774       |
| S20        | S16 OR S17 OR S18 OR S19                                                                                                                                                                                                                                                                                                                                                                                                                                                                                                                                                                                                    | 453         |
| S19        | (TI (prevent* N3 relaps*)) or (AB (prevent* N3 relaps*)) OR (KW (prevent* N3 relaps*))                                                                                                                                                                                                                                                                                                                                                                                                                                                                                                                                      | 5697        |
| S18        | (TI(prevent* N3 recurr*)) or (AB (prevent* N3 recurr*)) OR (KW (prevent* N3 recurr*))                                                                                                                                                                                                                                                                                                                                                                                                                                                                                                                                       | 1163        |
| S17        | (TI (deprescrib* or de prescrib* or deprescrip* or de prescrip*)) or (AB (deprescrib* or de prescrib* or deprescrip* or de prescrip*)) or (KW (deprescrib* or de prescrib* or deprescrip* or de prescrip*))                                                                                                                                                                                                                                                                                                                                                                                                                 | 463         |
| S16        | (TI (cease or cessation* or discontinu* or interrupt or interruption or taper* or reduce or drug holiday or stop or stopping or withdraw* or terminat* post withdraw* or postwithdraw*)) or (KW (cease or cessation* or discontinu* or interrupt or interruption or taper* or reduce or drug holiday or stop or stopping or withdraw* or terminat* post withdraw* or postwithdraw*)) or (MJ (cease or cessation* or discontinu* or interrupt or interruption or taper* or reduce or drug holiday or stop or stopping or withdraw* or terminat* post withdraw* or postwithdraw*)))(TI (cease or cessation* or discontinu* or | 38818       |

|     |                                                                                                                                                                                                                                                                                                                                                                                                                                                                                                                                                                                                                                                                                                                                                                                                                                                                                                                                                                                                                                                                                                                                                                                                                                                                                                                                                                                                                                                                                                                                                                                                                                                                                                                                                                                                                                                                                                                                                                                                                                                                                                                                                                                                                                                                                                                                                                                                                                                                                                                                                                  |        |
|-----|------------------------------------------------------------------------------------------------------------------------------------------------------------------------------------------------------------------------------------------------------------------------------------------------------------------------------------------------------------------------------------------------------------------------------------------------------------------------------------------------------------------------------------------------------------------------------------------------------------------------------------------------------------------------------------------------------------------------------------------------------------------------------------------------------------------------------------------------------------------------------------------------------------------------------------------------------------------------------------------------------------------------------------------------------------------------------------------------------------------------------------------------------------------------------------------------------------------------------------------------------------------------------------------------------------------------------------------------------------------------------------------------------------------------------------------------------------------------------------------------------------------------------------------------------------------------------------------------------------------------------------------------------------------------------------------------------------------------------------------------------------------------------------------------------------------------------------------------------------------------------------------------------------------------------------------------------------------------------------------------------------------------------------------------------------------------------------------------------------------------------------------------------------------------------------------------------------------------------------------------------------------------------------------------------------------------------------------------------------------------------------------------------------------------------------------------------------------------------------------------------------------------------------------------------------------|--------|
|     | interrupt or interruption or taper* or reduce or drug holiday or stop or stopping or withdraw* or terminat* post withdraw* or postwithdraw*)) or (KW (cease or cessation* or discontinu* or interrupt or interruption or taper* or reduce or drug holiday or stop or stopping or withdraw* or terminat* post withdraw* or postwithdraw*)) or (MJ (cease or cessation* or discontinu* or interrupt or interruption or taper* or reduce or drug holiday or stop or sto ...Show Less                                                                                                                                                                                                                                                                                                                                                                                                                                                                                                                                                                                                                                                                                                                                                                                                                                                                                                                                                                                                                                                                                                                                                                                                                                                                                                                                                                                                                                                                                                                                                                                                                                                                                                                                                                                                                                                                                                                                                                                                                                                                                |        |
| S15 | S12 OR S13 OR S14                                                                                                                                                                                                                                                                                                                                                                                                                                                                                                                                                                                                                                                                                                                                                                                                                                                                                                                                                                                                                                                                                                                                                                                                                                                                                                                                                                                                                                                                                                                                                                                                                                                                                                                                                                                                                                                                                                                                                                                                                                                                                                                                                                                                                                                                                                                                                                                                                                                                                                                                                | 111656 |
| S14 | (TI (mixed anxiety N2 depressive disorder)) OR (AB (mixed anxiety N2 depressive disorder))OR (KW (mixed anxiety N2 depressive disorder))                                                                                                                                                                                                                                                                                                                                                                                                                                                                                                                                                                                                                                                                                                                                                                                                                                                                                                                                                                                                                                                                                                                                                                                                                                                                                                                                                                                                                                                                                                                                                                                                                                                                                                                                                                                                                                                                                                                                                                                                                                                                                                                                                                                                                                                                                                                                                                                                                         | 363    |
| S13 | (TI (mixed anxiety N2 depression)) OR (AB (mixed anxiety N2 depression)) OR (KW (mixed anxiety N2 depression))                                                                                                                                                                                                                                                                                                                                                                                                                                                                                                                                                                                                                                                                                                                                                                                                                                                                                                                                                                                                                                                                                                                                                                                                                                                                                                                                                                                                                                                                                                                                                                                                                                                                                                                                                                                                                                                                                                                                                                                                                                                                                                                                                                                                                                                                                                                                                                                                                                                   | 1214   |
| S12 | DE "Major Depression" OR DE "Postpartum Depression" OR DE "Treatment Resistant Depression" OR DE "Late Life Depression" OR DE "Recurrent Depression" OR DE "Reactive Depression" OR DE "Endogenous Depression" OR DE "Atypical Depression"                                                                                                                                                                                                                                                                                                                                                                                                                                                                                                                                                                                                                                                                                                                                                                                                                                                                                                                                                                                                                                                                                                                                                                                                                                                                                                                                                                                                                                                                                                                                                                                                                                                                                                                                                                                                                                                                                                                                                                                                                                                                                                                                                                                                                                                                                                                       | 110816 |
| S11 | S1 OR S2 OR S3 OR S4 OR S5 OR S6 OR S7 OR S8 OR S9 OR S10                                                                                                                                                                                                                                                                                                                                                                                                                                                                                                                                                                                                                                                                                                                                                                                                                                                                                                                                                                                                                                                                                                                                                                                                                                                                                                                                                                                                                                                                                                                                                                                                                                                                                                                                                                                                                                                                                                                                                                                                                                                                                                                                                                                                                                                                                                                                                                                                                                                                                                        | 96482  |
| S10 | (TI (Opipramol or Oxaflazane or Paroxetine or Phenelzine or Pheniprazine or Pipofezin* or Pirandamine or Piribedil or Pirlindole or Pivagabine or Pizotiline or Propizepine or (Protriptylin* or Pertofrane) or Quinupramine or Quipazine or Reboxetine or Ritanserin or Rolipram or Scopolamine or Selegiline or Sertraline or (Setiptiline or Teciptiline) or Tandospirone or Teniloxine or Tetrindole or Thiazesim or Thozalinone or Tianeptin* or Toloxatone or Tranylcypromine or Trazodone or Trimipramine or 5 Hydroxytryptophan or 5 HT or Tryptophan or Hydroxytryptophan or Venlafaxine or Viloxazine or Vilazodone or Viquiline or Zalospirone or Zimeldine)) or (KW (Opipramol or Oxaflazane or Paroxetine or Phenelzine or Pheniprazine or Pipofezin* or Pirandamine or Piribedil or Pirlindole or Pivagabine or Pizotiline or Propizepine or (Protriptylin* or Pertofrane) or Quinupramine or Quipazine or Reboxetine or Ritanserin or Rolipram or Scopolamine or Selegiline or Sertraline or (Setiptiline or Teciptiline) or Tandospirone or Teniloxine or Tetrindole or Thiazesim or Thozalinone or Tianeptin* or Toloxatone or Tranylcypromine or Trazodone or Trimipramine or 5 Hydroxytryptophan or 5 HT or Tryptophan or Hydroxytryptophan or Venlafaxine or Viloxazine or Vilazodone or Viquiline or Zalospirone or Zimeldine)) or (MJ (Opipramol or Oxaflazane or Paroxetine or Phenelzine or Pheniprazine or Pipofezin* or Pirandamine or Piribedil or Pirlindole or Pivagabine or Pizotiline or Propizepine or (Protriptylin* or Pertofrane) or Quinupramine or Quipazine or Reboxetine or Ritanserin or Rolipram or Scopolamine or Selegiline or Sertraline or (Setiptiline or Teciptiline) or Tandospirone or Teniloxine or Tetrindole or Thiazesim or Thozalinone or Tianeptin* or Toloxatone or Tranylcypromine or Trazodone or Trimipramine or 5 Hydroxytryptophan or 5 HT or Tryptophan or Hydroxytryptophan or Venlafaxine or Viloxazine or Vilazodone or Viquiline or Zalospirone or Zimeldine))(TI (Opipramol or Oxaflazane or Paroxetine or Phenelzine or Pheniprazine or Pipofezin* or Pirandamine or Piribedil or Pirlindole or Pivagabine or Pizotiline or Propizepine or (Protriptylin* or Pertofrane) or Quinupramine or Quipazine or Reboxetine or Ritanserin or Rolipram or Scopolamine or Selegiline or Sertraline or (Setiptiline or Teciptiline) or Tandospirone or Teniloxine or Tetrindole or Thiazesim or Thozalinone or Tianeptin* or Toloxatone or Tranylcypromine or Trazodone or Trimipramine or ...Show Less | 16625  |
| S9  | (TI (Harmaline or Harmine or Hyperforin or Hypericum or John* Wort or Idazoxan or Imipramin* or Iprindole or Iproniazid* or Ipsapirone or Imipraminoxide or Isocarboxazid* or Lesopitron or Levomilnacipran or Lithium or Lofepramin* or (Lu AA21004 or Vortioxetine) or Lu AA24530 or LY2216684 or Maprotiline or Medifoxamine or Melitracen or Metapramine or Methylphenidate or Mianserin or Milnacipran or Minaprine or Mirtazapine or Moclobemide or Monocrotophos or Nefazodone or Nialamide or Nitroxazepine or Nomifensine or Norfenfluramine or Nortriptyline or Noxiptilin*)) or (KW (Harmaline or Harmine or Hyperforin or Hypericum or John* Wort or Idazoxan or Imipramin* or Iprindole or Iproniazid* or Ipsapirone or Imipraminoxide or Isocarboxazid* or Lesopitron or Levomilnacipran or Lithium or Lofepramin* or (Lu AA21004 or Vortioxetine) or Lu AA24530 or LY2216684 or Maprotiline or Medifoxamine or Melitracen or Metapramine or Methylphenidate or Mianserin or Milnacipran or Minaprine                                                                                                                                                                                                                                                                                                                                                                                                                                                                                                                                                                                                                                                                                                                                                                                                                                                                                                                                                                                                                                                                                                                                                                                                                                                                                                                                                                                                                                                                                                                                              | 15681  |

|    |                                                                                                                                                                                                                                                                                                                                                                                                                                                                                                                                                                                                                                                                                                                                                                                                                                                                                                                                                                                                                                                                                                                                                                                                                                                                                                                                                                                                                                                                                                                                                                                                                                                                                                                                                                                                                                                                                                                                                                                                                                                                                                                                                                                                                                                                                                                                                                                                                                                                                                                                                                                                                                                                                                                                                                                                                                                                                                                                                                                                                                                                                                                                                                                                                                                                                                            |       |
|----|------------------------------------------------------------------------------------------------------------------------------------------------------------------------------------------------------------------------------------------------------------------------------------------------------------------------------------------------------------------------------------------------------------------------------------------------------------------------------------------------------------------------------------------------------------------------------------------------------------------------------------------------------------------------------------------------------------------------------------------------------------------------------------------------------------------------------------------------------------------------------------------------------------------------------------------------------------------------------------------------------------------------------------------------------------------------------------------------------------------------------------------------------------------------------------------------------------------------------------------------------------------------------------------------------------------------------------------------------------------------------------------------------------------------------------------------------------------------------------------------------------------------------------------------------------------------------------------------------------------------------------------------------------------------------------------------------------------------------------------------------------------------------------------------------------------------------------------------------------------------------------------------------------------------------------------------------------------------------------------------------------------------------------------------------------------------------------------------------------------------------------------------------------------------------------------------------------------------------------------------------------------------------------------------------------------------------------------------------------------------------------------------------------------------------------------------------------------------------------------------------------------------------------------------------------------------------------------------------------------------------------------------------------------------------------------------------------------------------------------------------------------------------------------------------------------------------------------------------------------------------------------------------------------------------------------------------------------------------------------------------------------------------------------------------------------------------------------------------------------------------------------------------------------------------------------------------------------------------------------------------------------------------------------------------------|-------|
|    | <p>or Mirtazapine or Moclobemide or Monocrotophos or Nefazodone or Nialamide or Nitroxazepine or Nomifensine or Norfenfluramine or Nortriptyline or Noxiptilin*) or (MJ (Harmaline or Harmine or Hyperforin or Hypericum or John* Wort or Idazoxan or Imipramin* or Iprindole or Iproniazid* or Ipsapirone or Imipraminoxide or Isocarboxazid* or Lesopitron or Levomilnacipran or Lithium or Lofepramin* or (Lu AA21004 or Vortioxetine) or Lu AA24530 or LY2216684 or Maprotiline or Medifoxamine or Melitracen or Metapramine or Methylphenidate or Mianserin or Milnacipran or Minaprine or Mirtazapine or Moclobemide or Monocrotophos or Nefazodone or Nialamide or Nitroxazepine or Nomifensine or Norfenfluramine or Nortriptyline or Noxiptilin*)) (TI (Harmaline or Harmine or Hyperforin or Hypericum or John* Wort or Idazoxan or Imipramin* or Iprindole or Iproniazid* or Ipsapirone or Imipraminoxide or Isocarboxazid* or Lesopitron or Levomilnacipran or Lithium or Lofepramin* or (Lu AA21004 or Vortioxetine) or Lu AA24530 or LY2216684 or Maprotiline or Medifoxamine or Melitracen or Metapramine or Methylphenidate or Mianserin or Milnacipran or Minaprine or Mirtazapine or Moclobemide or Monocrotophos or Nefazodone or Nialamide or Nitroxazepine o ...Show Less</p>                                                                                                                                                                                                                                                                                                                                                                                                                                                                                                                                                                                                                                                                                                                                                                                                                                                                                                                                                                                                                                                                                                                                                                                                                                                                                                                                                                                                                                                                                                                                                                                                                                                                                                                                                                                                                                                                                                                                                                                                         |       |
| S8 | <p>(TI (Agomelatine or Alaproclate or Alnespirone or Amoxapine or Amersergide or Amfebutamone or Amiflamine or Amineptine or Amitriptylin* or Amitriptylinoxide or Amoxapine or Aripiprazole or Atomoxetine or Tomoxetine or Befloxatone or Benactyzine or Binospirone or Brofaromine or Bupropion or Butriptylin* or Caroxazone or Chlopoxiten or Cianopramine or Cilobamine or Cilosamine or Cimoxatone or Citalopram or (Chlorimipramin* or Clomipramin* or Chlomipramin* or Clorimipramine) or Clorgyline or Clovoxamine or Dapoxetine or Deanol or Dibenzeppin or Demexiptilin* or Deprenyl or Desipramine or Desvenlafaxine or Dibenzeppin or Diclofenasin* or Dimetacrin* or (Dosulepin or Dothiepin) or Doxepin or Duloxetine or DVS 233 or Enilospirone or Eptapirone or Escitalopram or Etoferidone or Femoxetine or Fenfluramin* or Fluotracen or Fluoxetine or Fluparoxan or Furazolidone or Fluvoxamine)) or (KW (Agomelatine or Alaproclate or Alnespirone or Amoxapine or Amersergide or Amfebutamone or Amiflamine or Amineptine or Amitriptylin* or Amitriptylinoxide or Amoxapine or Aripiprazole or Atomoxetine or Tomoxetine or Befloxatone or Benactyzine or Binospirone or Brofaromine or Bupropion or Butriptylin* or Caroxazone or Chlopoxiten or Cianopramine or Cilobamine or Cilosamine or Cimoxatone or Citalopram or (Chlorimipramin* or Clomipramin* or Chlomipramin* or Clorimipramine) or Clorgyline or Clovoxamine or Dapoxetine or Deanol or Dibenzeppin or Demexiptilin* or Deprenyl or Desipramine or Desvenlafaxine or Dibenzeppin or Diclofenasin* or Dimetacrin* or (Dosulepin or Dothiepin) or Doxepin or Duloxetine or DVS 233 or Enilospirone or Eptapirone or Escitalopram or Etoferidone or Femoxetine or Fenfluramin* or Fluotracen or Fluoxetine or Fluparoxan or Furazolidone or Fluvoxamine)) or (MJ (Agomelatine or Alnespirone or Alproclate or Amoxapine or Amersergide or Amfebutamone or Amiflamine or Amineptine or Amitriptylin* or Amitriptylinoxide or Amoxapine or Aripiprazole or Atomoxetine or Tomoxetine or Befloxatone or Benactyzine or Binospirone or Brofaromine or Bupropion or Butriptylin* or Caroxazone or Chlopoxiten or Cianopramine or Cilobamine or Cilosamine or Cimoxatone or Citalopram or (Chlorimipramin* or Clomipramin* or Chlomipramin* or Clorimipramine) or Clorgyline or Clovoxamine or Dapoxetine or Deanol or Dibenzeppin or Demexiptilin* or Deprenyl or Desipramine or Desvenlafaxine or Dibenzeppin or Diclofenasin* or Dimetacrin* or (Dosulepin or Dothiepin) or Doxepin or Duloxetine or DVS 233 or Enilospirone or Eptapirone or Escitalopram or Etoferidone or Femoxetine or Fenfluramin* or Fluotracen or Fluoxetine or Fluparoxan or Furazolidone or Fluvoxamine)) (TI (Agomelatine or Alaproclate or Alnespirone or Amoxapine or Amersergide or Amfebutamone or Amiflamine or Amineptine or Amitriptylin* or Amitriptylinoxide or Amoxapine or Aripiprazole or Atomoxetine or Tomoxetine or Befloxatone or Benactyzine or Binospirone or Brofaromine or Bupropion or Butriptylin* or Caroxazone or Chlopoxiten or Cianopramine or Cilobamine or Cilosamine or Cimoxatone or Citalopram or (Chlorimipramin* or Clomipramin* or Chlomipramin* or Clorimipramine) or Clorgyline or Clovoxa ...Show Less</p> | 14679 |

|    |                                                                                                                                                                                                                                                                                                                                                                                                                                                                                                                                                                                                                                                                                                                                                                                                                                                                                                                                                                                                                                                                                                                                                                                                                                                                                                                                                                                                                                                                                                                                                                                                  |       |
|----|--------------------------------------------------------------------------------------------------------------------------------------------------------------------------------------------------------------------------------------------------------------------------------------------------------------------------------------------------------------------------------------------------------------------------------------------------------------------------------------------------------------------------------------------------------------------------------------------------------------------------------------------------------------------------------------------------------------------------------------------------------------------------------------------------------------------------------------------------------------------------------------------------------------------------------------------------------------------------------------------------------------------------------------------------------------------------------------------------------------------------------------------------------------------------------------------------------------------------------------------------------------------------------------------------------------------------------------------------------------------------------------------------------------------------------------------------------------------------------------------------------------------------------------------------------------------------------------------------|-------|
| S7 | (TI (psychotropic* or antidepress* or anti depress* or ((serotonin or norepinephrine or noradrenaline or nor epinephrine or nor adrenaline or neurotransmitt* or dopamine*) and (uptake or reuptake or re-uptake)) or noradrenerg* or antiadrenergic or anti adrenergic or SSRI* or SNRI* or TCA* or tricyclic* or tetracyclic* or heterocyclic*)) or (AB (psychotropic* or antidepress* or anti depress* or ((serotonin or norepinephrine or noradrenaline or nor epinephrine or nor adrenaline or neurotransmitt* or dopamine*) and (uptake or reuptake or re-uptake)) or noradrenerg* or antiadrenergic or anti adrenergic or SSRI* or SNRI* or TCA* or tricyclic* or tetracyclic* or heterocyclic*)) or (KW (psychotropic* or antidepress* or anti depress* or ((serotonin or norepinephrine or noradrenaline or nor epinephrine or nor adrenaline or neurotransmitt* or dopamine*) and (uptake or reuptake or re-uptake)) or noradrenerg* or antiadrenergic or anti adrenergic or SSRI* or SNRI* or TCA* or tricyclic* or tetracyclic* or heterocyclic*))) (TI (psychotropic* or antidepress* or anti depress* or ((serotonin or norepinephrine or noradrenaline or nor epinephrine or nor adrenaline or neurotransmitt* or dopamine*) and (uptake or reuptake or re-uptake)) or noradrenerg* or antiadrenergic or anti adrenergic or SSRI* or SNRI* or TCA* or tricyclic* or tetracyclic* or heterocyclic*)) or (AB (psychotropic* or antidepress* or anti depress* or ((serotonin or norepinephrine or noradrenaline or nor epinephrine or nor adrenaline or neurotransmitt* ...Show Less | 59965 |
| S6 | DE "Tricyclic Antidepressant Drugs" OR DE "Amitriptyline" OR DE "Chlorimipramine" OR DE "Desipramine" OR DE "Doxepin" OR DE "Imipramine" OR DE "Maprotiline" OR DE "Nortriptyline"                                                                                                                                                                                                                                                                                                                                                                                                                                                                                                                                                                                                                                                                                                                                                                                                                                                                                                                                                                                                                                                                                                                                                                                                                                                                                                                                                                                                               | 8847  |
| S5 | DE "Serotonin Reuptake Inhibitors" OR DE "Citalopram" OR DE "Fluoxetine" OR DE "Fluvoxamine" OR DE "Paroxetine" OR DE "Zimeldine"                                                                                                                                                                                                                                                                                                                                                                                                                                                                                                                                                                                                                                                                                                                                                                                                                                                                                                                                                                                                                                                                                                                                                                                                                                                                                                                                                                                                                                                                | 13283 |
| S4 | DE "Serotonin Norepinephrine Reuptake Inhibitors" OR DE "Venlafaxine"                                                                                                                                                                                                                                                                                                                                                                                                                                                                                                                                                                                                                                                                                                                                                                                                                                                                                                                                                                                                                                                                                                                                                                                                                                                                                                                                                                                                                                                                                                                            | 1525  |
| S3 | DE "Neurotransmitter Uptake Inhibitors"                                                                                                                                                                                                                                                                                                                                                                                                                                                                                                                                                                                                                                                                                                                                                                                                                                                                                                                                                                                                                                                                                                                                                                                                                                                                                                                                                                                                                                                                                                                                                          | 326   |
| S2 | DE "Antidepressant Drugs"                                                                                                                                                                                                                                                                                                                                                                                                                                                                                                                                                                                                                                                                                                                                                                                                                                                                                                                                                                                                                                                                                                                                                                                                                                                                                                                                                                                                                                                                                                                                                                        | 17567 |
| S1 | DE "Psychopharmacology" or DE "Neuropsychopharmacology"                                                                                                                                                                                                                                                                                                                                                                                                                                                                                                                                                                                                                                                                                                                                                                                                                                                                                                                                                                                                                                                                                                                                                                                                                                                                                                                                                                                                                                                                                                                                          | 9416  |

## The Allied and Complementary Medicine Database (AMED)

AMED (EBSCOhost), inception to 23 March 2017

| Search ID# | Query                                                                                                                                                                                                                                                                                                                                                                                                                                                                                                            | Items found |
|------------|------------------------------------------------------------------------------------------------------------------------------------------------------------------------------------------------------------------------------------------------------------------------------------------------------------------------------------------------------------------------------------------------------------------------------------------------------------------------------------------------------------------|-------------|
| S35        | S6 AND S10 AND S15 AND S34                                                                                                                                                                                                                                                                                                                                                                                                                                                                                       | 21          |
| S34        | S22 OR S30 OR S33                                                                                                                                                                                                                                                                                                                                                                                                                                                                                                | 21001       |
| S33        | S31 OR S32                                                                                                                                                                                                                                                                                                                                                                                                                                                                                                       | 4389        |
| S32        | (TI (case N1 report*)) or (AB (case N1 report*)) OR (KW (case N1 report*))                                                                                                                                                                                                                                                                                                                                                                                                                                       | 4079        |
| S31        | (TI (case N1 series) or (AB (case N1 series) OR (KW (case N1 series)                                                                                                                                                                                                                                                                                                                                                                                                                                             | 343         |
| S30        | S23 OR S24 OR S25 OR S26 OR S27 OR S28 OR S29                                                                                                                                                                                                                                                                                                                                                                                                                                                                    | 5541        |
| S29        | (TI (cross sectional N1 (study or studies))) or (AB (cross sectional N1 (study or studies))) OR (KW (cross sectional N1 (study or studies)))                                                                                                                                                                                                                                                                                                                                                                     | 1925        |
| S28        | (TI (follow up N1 (study or studies))) or (AB (follow up N1 (study or studies))) OR (KW (follow up N1 (study or studies)))                                                                                                                                                                                                                                                                                                                                                                                       | 760         |
| S27        | (TI (cohort N1 (study or studies))) or (AB (cohort N1 (study or studies))) OR (KW (cohort N1 (study or studies)))                                                                                                                                                                                                                                                                                                                                                                                                | 1839        |
| S26        | (TI (case N1 control)) or (AB (case N1 control)) OR (KW (case N1 control))                                                                                                                                                                                                                                                                                                                                                                                                                                       | 708         |
| S25        | (TI (observational N1 (study or studies)) or (AB (observational N1 (study or studies)) OR (KW (observational N1 (study or studies)))                                                                                                                                                                                                                                                                                                                                                                             | 132         |
| S24        | (TI (observational N1 (study or studies)) or (AB (observational N1 (study or studies)) OR (KW (observational N1 (study or studies)))                                                                                                                                                                                                                                                                                                                                                                             | 132         |
| S23        | (TI (epidemiologic* N1 (study or studies)) or (AB (epidemiologic* N1 (study or studies)) OR (KW (epidemiologic* N1 (study or studies)))                                                                                                                                                                                                                                                                                                                                                                          | 532         |
| S22        | S16 OR S17 OR S18 OR S19 OR S20 OR S21                                                                                                                                                                                                                                                                                                                                                                                                                                                                           | 12226       |
| S21        | (AB (waitlist* or wait* list* or treatment as usual or TAU) N3 (control or group)))                                                                                                                                                                                                                                                                                                                                                                                                                              | 355         |
| S20        | (TI (quasi N1 (experimental OR randomi*)) or (AB (quasi N1 (experimental OR randomi*)))                                                                                                                                                                                                                                                                                                                                                                                                                          | 387         |
| S19        | (TI (control* N3 (trial* or study or studies)) or (AB (control* N3 (trial* or study or studies)))                                                                                                                                                                                                                                                                                                                                                                                                                | 9141        |
| S18        | (TI (controlled N1 trial*)) or (AB (controlled N1 trial*))                                                                                                                                                                                                                                                                                                                                                                                                                                                       | 5597        |
| S17        | (TI (randomi* control* trial*)) or (AB (randomi* control* trial*))                                                                                                                                                                                                                                                                                                                                                                                                                                               | 5803        |
| S16        | (TI (clinic* N1 trial*)) OR (AB (clinic* N1 trial*))                                                                                                                                                                                                                                                                                                                                                                                                                                                             | 3644        |
| S15        | S11 OR S12 OR S13 OR S14                                                                                                                                                                                                                                                                                                                                                                                                                                                                                         | 8964        |
| S14        | (TI (prevent* N3 relaps*)) or (AB (prevent* N3 relaps*)) or (KW (prevent* N3 relaps*))                                                                                                                                                                                                                                                                                                                                                                                                                           | 22          |
| S13        | (TI(prevent* N3 recurr*)) or (AB (prevent* N3 recurr*)) or (KW (prevent* N3 recurr*))                                                                                                                                                                                                                                                                                                                                                                                                                            | 31          |
| S12        | (TI (deprescrib* or de prescrib* or deprescrip* or de prescrip*)) or (AB (deprescrib* or de prescrib* or deprescrip* or de prescrip*)) or (KW (deprescrib* or de prescrib* or deprescrip* or de prescrip*))                                                                                                                                                                                                                                                                                                      | 22          |
| S11        | (TI (cease or cessation* or discontinu* or interrupt or interruption or taper* or reduce or drug holiday or stop or stopping or withdraw* or terminat*)) or (AB (cease or cessation* or continuation or discontinu* or interrupt or interruption or taper* or reduce or drug holiday or stop or stopping or withdraw* or terminat*)) or (KW (cease or cessation* or continuation or discontinu* or interrupt or interruption or taper* or reduce or drug holiday or stop or stopping or withdraw* or terminat*)) | 89          |
| S10        | S7 OR S8 OR S9                                                                                                                                                                                                                                                                                                                                                                                                                                                                                                   | 6074        |
| S9         | (TI ( depressive disorder or depression or mixed anxiety)) or (AB (depressive disorder or depression or mixed anxiety)) or (KW (depressive disorder or depression or mixed anxiety))                                                                                                                                                                                                                                                                                                                             | 604         |
| S8         | (DE "ADJUSTMENT DISORDERS")                                                                                                                                                                                                                                                                                                                                                                                                                                                                                      | 15          |
| S7         | (DE "DEPRESSION") OR (DE "DEPRESSIVE DISORDER") OR (DE "DEPRESSIVE DISORDERS")                                                                                                                                                                                                                                                                                                                                                                                                                                   | 2988        |
| S6         | S1 OR S2 OR S3 OR S4 OR S5                                                                                                                                                                                                                                                                                                                                                                                                                                                                                       | 2046        |
| S5         | (TI (Opipramol or Oxaflazane or Paroxetine or Phenelzine or Pheniprazine or Pipofezin* or                                                                                                                                                                                                                                                                                                                                                                                                                        | 142         |

|    |                                                                                                                                                                                                                                                                                                                                                                                                                                                                                                                                                                                                                                                                                                                                                                                                                                                                                                                                                                                                                                                                                                                                                                                                                                                                                                                                                                                                                                                                                                                                                                                                                                                                                                                                                                                                       |     |
|----|-------------------------------------------------------------------------------------------------------------------------------------------------------------------------------------------------------------------------------------------------------------------------------------------------------------------------------------------------------------------------------------------------------------------------------------------------------------------------------------------------------------------------------------------------------------------------------------------------------------------------------------------------------------------------------------------------------------------------------------------------------------------------------------------------------------------------------------------------------------------------------------------------------------------------------------------------------------------------------------------------------------------------------------------------------------------------------------------------------------------------------------------------------------------------------------------------------------------------------------------------------------------------------------------------------------------------------------------------------------------------------------------------------------------------------------------------------------------------------------------------------------------------------------------------------------------------------------------------------------------------------------------------------------------------------------------------------------------------------------------------------------------------------------------------------|-----|
|    | <p>Pirandamine or Piribedil or Pirlindole or Pivagabine or Pizotyline or Propizepine or (Protriptylin* or Pertofrane) or Quinupramine or Quipazine or Reboxetine or Ritanserin or Rolipram or Scopolamine or Selegiline or Sertraline or (Setiptiline or Teciptiline) or Tandospirone or Teniloxine or Tetrindole or Thiazesim or Thozalinone or Tianeptin* or Toloxatone or Tranlycypromine or Trazodone or Trimipramine or 5 Hydroxytryptophan or 5 HT or Tryptophan or Hydroxytryptophan or Venlafaxine or Viloxazine or Vilazodone or Viqualine or Zalospirone or Zimeldine)) or (KW (Opipramol or Oxaflazane or Paroxetine or Phenelzine or Pheniprazine or Pipofezin* or Pirandamine or Piribedil or Pirlindole or Pivagabine or Pizotyline or Propizepine or (Protriptylin* or Pertofrane) or Quinupramine or Quipazine or Reboxetine or Ritanserin or Rolipram or Scopolamine or Selegiline or Sertraline or (Setiptiline or Teciptiline) or Tandospirone or Teniloxine or Tetrindole or Thiazesim or Thozalinone or Tianeptin* or Toloxatone or Tranlycypromine or Trazodone or Trimipramine or 5 Hydroxytryptophan or 5 HT or Tryptophan or Hydroxytryptophan or Venlafaxine or Viloxazine or Vilazodone or Viqualine or Zalospirone or Zimeldine)) or (MJ (Opipramol or Oxaflazane or Paroxetine or Phenelzine or Pheniprazine or Pipofezin* or Pirandamine or Piribedil or Pirlindole or Pivagabine or Pizotyline or Propizepine or (Protriptylin* or Pertofrane) or Quinupramine or Quipazine or Reboxetine or Ritanserin or Rolipram or Scopolamine or Selegiline or Sertraline or (Setiptiline or Teciptiline) or Tandospirone or Teniloxine or Tetrindole or Thiazesim or Thozalinone or Tianeptin* or Toloxatone or Tranlycypromine or Trazodone or Trimipramine or ...Show Less</p> |     |
| S4 | <p>(TI (Harmaline or Harmine or Hyperforin or Hypericum or John* Wort or Idazoxan or Imipramin* or Iprindole or Iproniazid* or Ipsapirone or Imipraminoxide or Isocarboxazid* or Lesopitron or Levomilnacipran or Lithium or Lofepramin* or (Lu AA21004 or Vortioxetine) or Lu AA24530 or LY2216684 or Maprotiline or Medifoxamine or Melitracen or Metapramine or Methylphenidate or Mianserin or Milnacipran or Minaprine or Mirtazapine or Moclobemide or Monocrotophos or Nefazodone or Nialamide or Nitroxazepine or Nomifensine or Norfenfluramine or Nortriptyline or Noxiptilin*)) or (KW (Harmaline or Harmine or Hyperforin or Hypericum or John* Wort or Idazoxan or Imipramin* or Iprindole or Iproniazid* or Ipsapirone or Imipraminoxide or Isocarboxazid* or Lesopitron or Levomilnacipran or Lithium or Lofepramin* or (Lu AA21004 or Vortioxetine) or Lu AA24530 or LY2216684 or Maprotiline or Medifoxamine or Melitracen or Metapramine or Methylphenidate or Mianserin or Milnacipran or Minaprine or Mirtazapine or Moclobemide or Monocrotophos or Nefazodone or Nialamide or Nitroxazepine or Nomifensine or Norfenfluramine or Nortriptyline or Noxiptilin*)) or (MJ (Harmaline or Harmine or Hyperforin or Hypericum or John* Wort or Idazoxan or Imipramin* or Iprindole or Iproniazid* or Ipsapirone or Imipraminoxide or Isocarboxazid* or Lesopitron or Levomilnacipran or Lithium or Lofepramin* or (Lu AA21004 or Vortioxetine) or Lu AA24530 or LY2216684 or Maprotiline or Medifoxamine or Melitracen or Metapramine or Methylphenidate or Mianserin or Milnacipran or Minaprine or Mirtazapine or Moclobemide or Monocrotophos or Nefazodone or Nialamide or Nitroxazepine o ...Show Less</p>                                                                       | 436 |



|    |                                                                                    |     |
|----|------------------------------------------------------------------------------------|-----|
|    | noradrenaline or nor epinephrine or nor adrenaline or neurotransmitt* ...Show Less |     |
| S1 | (DE "antidepressive agents")                                                       | 313 |

## Health Management Information Consortium (HMIC)

HMIC, inception to 24 March 2017

| Search ID# | Query                                                                                                                                                                                                                                                                                                                                                                                                                                                                                                                                                                                                                                                                                                                                                                                                                                                                                             | Items found |
|------------|---------------------------------------------------------------------------------------------------------------------------------------------------------------------------------------------------------------------------------------------------------------------------------------------------------------------------------------------------------------------------------------------------------------------------------------------------------------------------------------------------------------------------------------------------------------------------------------------------------------------------------------------------------------------------------------------------------------------------------------------------------------------------------------------------------------------------------------------------------------------------------------------------|-------------|
| 1          | "PSYCHOPHARMACOLOGY"/                                                                                                                                                                                                                                                                                                                                                                                                                                                                                                                                                                                                                                                                                                                                                                                                                                                                             | 42          |
| 2          | "PSYCHOTROPIC DRUGS"/                                                                                                                                                                                                                                                                                                                                                                                                                                                                                                                                                                                                                                                                                                                                                                                                                                                                             | 135         |
| 3          | exp "ANTI DEPRESSANTS"/                                                                                                                                                                                                                                                                                                                                                                                                                                                                                                                                                                                                                                                                                                                                                                                                                                                                           | 389         |
| 4          | exp "SELECTIVE SEROTONIN REUPTAKE INHIBITORS"/                                                                                                                                                                                                                                                                                                                                                                                                                                                                                                                                                                                                                                                                                                                                                                                                                                                    | 35          |
| 5          | (psychotropic* OR antidepress* OR anti depress* OR ((serotonin OR norepinephrine OR noradrenaline OR nor epinephrine OR nor adrenaline OR neurotransmitt* OR dopamine*) AND (uptake OR reuptake OR re-uptake)) OR noradrenerg* OR antiadrenergic OR antiadrenergic OR SSRI* OR SNRI* OR TCA* OR tricyclic* OR tetracyclic* OR heterocyclic*).ti,ab                                                                                                                                                                                                                                                                                                                                                                                                                                                                                                                                                | 929         |
| 6          | (Agomelatine OR Alaproclate OR Alnespirone OR Amoxapine OR Amersergide OR Amfebutamone OR Amiflamine OR Amineptine OR Amitriptylin* OR Amitriptylinoxide OR Amoxapine OR Aripiprazole OR Atomoxetine OR Tomoxetine OR Befloxatone OR Benactyzine OR Binospirone OR Brofaromine OR Bupropion OR Butriptylin* OR Caroxazone OR Chlopoxiten OR Cianopramine OR Cilobamine OR Cilosamine OR Cimoxatone OR Citalopram OR Chlorimipramin* OR Clomipramin* OR Chlomipramin* OR Clorimipramine OR Clorgyline OR Clovoxamine OR Dapoxetine OR Deanol OR Demexiptilin* OR Deprenyl OR Desipramine OR Desvenlafaxine OR Dibenzeprin OR Diclofenasin* OR Dimetacrin* OR Dosulepin OR Dothiepin OR Doxepin OR Duloxetine OR DVS 233 OR Enilospirone OR Eptapirone OR Escitalopram OR Etoperidone OR Femoxetine OR Fenfluramin* OR Fluotracen OR Fluoxetine OR Fluparoxan OR Furazolidone OR Fluvoxamine).ti,ab | 220         |
| 7          | (Harmaline OR Harmine OR Hyperforin OR Hypericum OR John* Wort OR Idazoxan OR Imipramin* OR Iprindole OR Iproniazid* OR Ipsapirone OR Imipraminoxide OR Isocarboxazid* OR Lesopitron OR Levomilnacipran OR Lithium OR Lofepamin* OR Lu AA21004 OR Vortioxetine OR Lu AA24530 OR LY2216684 OR Maprotiline OR Medifoxamine OR Melitracen OR Metapramine OR Methylphenidate OR Mianserin OR Milnacipran OR Minaprine OR Mirtazapine OR Moclobemide OR Monocrotophos OR Nefazodone OR Nialamide OR Nitroxazepine OR Nomifensine OR Norfenfluramine OR Nortriptyline OR Noxiptilin*).ti,ab                                                                                                                                                                                                                                                                                                             | 126         |
| 8          | (Opipramol OR Oxaflorane OR Paroxetine OR Phenelzine OR Pheniprazine OR Pipofezin* OR Pirandamine OR Piribedil OR Pirlindole OR Pivagabine OR Pizotyline OR Propizepine OR Protriptylin* OR Pertofrane OR Quinupramine OR Quipazine OR Reboxetine OR Ritanserin OR Rolipram OR Scopolamine OR Selegiline OR Sertraline OR Setiptiline OR Teciptiline OR Tandospirone OR Teniloxine OR Tetrindole OR Thiazesim OR Thozalinone OR Tianeptin* OR Toloxatone OR Tranlycypromine OR Trazodone OR Trimipramine OR 5 Hydroxytryptophan OR 5 HT OR Tryptophan OR Hydroxytryptophan OR Venlafaxine OR Viloxazine OR Vilazodone OR Viquiline OR Zalospiroline OR Zimeldine).ti,ab                                                                                                                                                                                                                           | 99          |
| 9          | (1 OR 2 OR 3 OR 4 OR 5 OR 6 OR 7 OR 8)                                                                                                                                                                                                                                                                                                                                                                                                                                                                                                                                                                                                                                                                                                                                                                                                                                                            | 1307        |
| 10         | "MOOD DISORDERS"/                                                                                                                                                                                                                                                                                                                                                                                                                                                                                                                                                                                                                                                                                                                                                                                                                                                                                 | 90          |
| 11         | "DEPRESSION"/                                                                                                                                                                                                                                                                                                                                                                                                                                                                                                                                                                                                                                                                                                                                                                                                                                                                                     | 2608        |
| 12         | (depressive disorder OR depression OR mixed anxiety).ti,ab                                                                                                                                                                                                                                                                                                                                                                                                                                                                                                                                                                                                                                                                                                                                                                                                                                        | 4422        |
| 13         | (10 OR 11 OR 12)                                                                                                                                                                                                                                                                                                                                                                                                                                                                                                                                                                                                                                                                                                                                                                                                                                                                                  | 4909        |
| 14         | (cease OR cessation* OR discontinu* OR interrupt OR interruption OR taper* OR reduce OR drug holiday OR stop OR stopping OR withdraw* OR terminat* OR deprescrib* OR de prescrib* OR deprescrip* OR de prescrip*).ti,ab b                                                                                                                                                                                                                                                                                                                                                                                                                                                                                                                                                                                                                                                                         | 14611       |
| 15         | (prevent* ADJ3 relaps*).ti,ab                                                                                                                                                                                                                                                                                                                                                                                                                                                                                                                                                                                                                                                                                                                                                                                                                                                                     | 144         |
| 16         | (prevent* ADJ3 recurr*).ti,ab                                                                                                                                                                                                                                                                                                                                                                                                                                                                                                                                                                                                                                                                                                                                                                                                                                                                     | 91          |
| 17         | (14 OR 15 OR 16)                                                                                                                                                                                                                                                                                                                                                                                                                                                                                                                                                                                                                                                                                                                                                                                                                                                                                  | 14771       |

|    |                                                                                                       |       |
|----|-------------------------------------------------------------------------------------------------------|-------|
| 18 | "RANDOMISED CONTROLLED TRIALS"/                                                                       | 2352  |
| 19 | (randomi#ed OR randomi#ation).ti,ab                                                                   | 6465  |
| 20 | (randomly).ab                                                                                         | 2789  |
| 21 | (trial).ti,ab trial.ti,ab                                                                             | 6264  |
| 22 | (groups).ab                                                                                           | 23383 |
| 23 | (control* ADJ3 (trial* OR study OR studies)).ti,ab (control* adj3 (trial* or study or studies)).ti,ab | 6624  |
| 24 | (quasi ADJ (experimental OR random*)).ti,ab (quasi adj (experimental or random*)).ti,ab               | 410   |
| 25 | ((waitlist* OR wait* list* OR treatment as usual OR TAU) ADJ3 (control OR group)).ab                  | 87    |
| 26 | (18 OR 19 OR 20 OR 21 OR 22 OR 23 OR 24 OR 25) (18 OR 19 OR 20 OR 21 OR 22 OR 23 OR 24 OR 25)         | 33018 |
| 27 | "COHORT STUDIES"/                                                                                     | 1010  |
| 28 | "PROSPECTIVE STUDIES"/                                                                                | 198   |
| 29 | "LONGITUDINAL STUDIES"/                                                                               | 542   |
| 30 | (Case control).ti,ab                                                                                  | 1403  |
| 31 | (cohort ADJ (study OR studies)).ti,ab                                                                 | 3279  |
| 32 | (Cohort analy*).ti,ab                                                                                 | 134   |
| 33 | (Follow up ADJ (study OR studies)).ti,ab                                                              | 633   |
| 34 | (observational ADJ (study OR studies)).ti,ab                                                          | 1373  |
| 35 | (epidemiologic* ADJ (study OR studies)).ti,ab                                                         | 951   |
| 36 | (Longitudinal).ti,ab                                                                                  | 3139  |
| 37 | (Retrospective).ti,ab                                                                                 | 3045  |
| 38 | (Cross sectional).ti,ab                                                                               | 4708  |
| 39 | (27 OR 28 OR 29 OR 30 OR 31 OR 32 OR 33 OR 34 OR 35 OR 36 OR 37 OR 38)                                | 16417 |
| 40 | (Case series).ti,ab                                                                                   | 114   |
| 41 | (Case* report*).ti,ab                                                                                 | 323   |
| 42 | (Case* stud*).ti,ab                                                                                   | 6076  |
| 43 | (40 OR 41 OR 42)                                                                                      | 6487  |
| 44 | (26 OR 39 OR 43)                                                                                      | 50227 |
| 45 | (9 AND 13 AND 17 AND 44)                                                                              | 56    |
| 46 | (rodent* OR rat OR rats OR mouse OR mice OR animal model*).ti                                         | 139   |
| 47 | (smoking OR tobacco OR nicotine).ti (smoking OR tobacco OR nicotine).ti                               | 3936  |
| 48 | (smoking cessation).ti,ab                                                                             | 1191  |
| 49 | (antibiotic* OR antimicrob* OR antifung* OR statin*).ti                                               | 796   |
| 50 | (46 OR 47 OR 48 OR 49)                                                                                | 5138  |
| 51 | 45 NOT 50                                                                                             | 48    |

| Query                                                                                                                                                                                                                                                        | Items found |
|--------------------------------------------------------------------------------------------------------------------------------------------------------------------------------------------------------------------------------------------------------------|-------------|
| (antidepressant* OR SSRI* OR serotonin reuptake inhibitor* OR SNRI* OR noradrenaline reuptake inhibitor* OR norepinephrine reuptake inhibitor* or tricyclic antidepressant*) AND (trial* OR RCT* OR observational OR cohort* OR case series OR case report*) | 28          |

## WHO International Clinical Trials Registry platform (WHO ICTRP).

WHO ICTRP (<http://apps.who.int/trialsearch/default.aspx>), inception to 24 March 2017

| Query                               | Items found                                                                                                 |
|-------------------------------------|-------------------------------------------------------------------------------------------------------------|
| Depression AND prevent* AND relapse | 110                                                                                                         |
| Depression AND prevent* AND recurr* | 33                                                                                                          |
| Antidepressant* AND cease           | 1                                                                                                           |
| Antidepressant* AND cessation       | 3                                                                                                           |
| Antidepressant* AND discontinuation | 13                                                                                                          |
| Antidepressant* AND taper*          | 11                                                                                                          |
| Antidepressant* AND reduce          | 6                                                                                                           |
| Antidepressant* AND stop*           | 4                                                                                                           |
| Antidepressant* AND withdraw*       | 8                                                                                                           |
| Antidepressant* AND terminat*       | 3                                                                                                           |
| Antidepressant* AND deprescrib*     | 3                                                                                                           |
| SSRI* AND cease                     | 0                                                                                                           |
| SSRI* AND cessation                 | 0                                                                                                           |
| SSRI* AND discontinuation           | 1                                                                                                           |
| SSRI* AND taper*                    | 3                                                                                                           |
| SSRI* AND reduce                    | 3                                                                                                           |
| SSRI* AND stop*                     | 1                                                                                                           |
| SSRI* AND withdraw*                 | 1                                                                                                           |
| SSRI* AND terminat*                 | 0                                                                                                           |
| SSRI* AND deprescrib*               | 0                                                                                                           |
| SNRI* AND cease                     | 0                                                                                                           |
| SNRI* AND cessation                 | 0                                                                                                           |
| SNRI* AND discontinuation           | 0                                                                                                           |
| SNRI* AND taper*                    | 1                                                                                                           |
| SNRI* AND reduce                    | 0                                                                                                           |
| SNRI* AND stop*                     | 0                                                                                                           |
| SNRI* AND withdraw*                 | 0                                                                                                           |
| SNRI* AND terminat*                 | 0                                                                                                           |
| SNRI* AND deprescrib*               | 0                                                                                                           |
| TCA AND cease                       | Only brought up records for non-psychiatric indications e.g. diabetes, stem cells, transplantations, cancer |

|                                               |           |
|-----------------------------------------------|-----------|
| TCA AND cessation                             | See above |
| TCA AND discontinuation                       | See above |
| TCA AND taper*                                | See above |
| TCA AND reduce                                | See above |
| TCA AND stop*                                 | See above |
| TCA AND withdraw*                             | See above |
| TCA AND terminat*                             | See above |
| TCA AND deprescrib*                           | See above |
| tricyclic antidepressant* AND cease           | 0         |
| tricyclic antidepressant* AND cessation       | 1         |
| tricyclic antidepressant* AND discontinuation | 0         |
| tricyclic antidepressant* AND taper*          | 1         |
| tricyclic antidepressant* AND reduce          | 2         |
| tricyclic antidepressant* AND stop*           | 0         |
| tricyclic antidepressant* AND withdraw*       | 1         |
| tricyclic antidepressant* AND terminat*       | 0         |
| tricyclic antidepressant* AND deprescrib*     | 1         |
| citalopram AND cease                          | 0         |
| citalopram AND cessation                      | 0         |
| citalopram AND discontinuation                | 4         |
| citalopram AND taper*                         | 2         |
| citalopram AND reduce                         | 2         |
| citalopram AND stop*                          | 1         |
| citalopram AND withdraw*                      | 0         |
| citalopram AND terminat*                      | 0         |
| citalopram AND deprescrib*                    | 0         |
| escitalopram AND cease                        | 0         |
| escitalopram AND cessation                    | 1         |
| escitalopram AND discontinuation              | 6         |
| escitalopram AND taper*                       | 2         |
| escitalopram AND reduce                       | 1         |
| escitalopram AND stop*                        | 0         |
| escitalopram AND withdraw*                    | 2         |
| escitalopram AND terminat*                    | 2         |
| escitalopram AND deprescrib*                  | 0         |
| fluoxetine AND cease                          | 0         |
| fluoxetine AND cessation                      | 1         |
| fluoxetine AND discontinuation                | 1         |
| fluoxetine AND taper*                         | 1         |
| fluoxetine AND reduce                         | 2         |
| fluoxetine AND stop*                          | 2         |

|                                 |   |
|---------------------------------|---|
| fluoxetine AND withdraw*        | 0 |
| fluoxetine AND terminat*        | 0 |
| fluoxetine AND deprescrib*      | 0 |
| fluvoxamine AND cease           | 0 |
| fluvoxamine AND cessation       | 0 |
| fluvoxamine AND discontinuation | 0 |
| fluvoxamine AND taper*          | 1 |
| fluvoxamine AND reduce          | 0 |
| fluvoxamine AND stop*           | 0 |
| fluvoxamine AND withdraw*       | 0 |
| fluvoxamine AND terminat*       | 0 |
| fluvoxamine AND deprescrib*     | 0 |
| paroxetine AND cessation        | 0 |
| paroxetine AND discontinuation  | 1 |
| paroxetine AND taper*           | 0 |
| paroxetine AND reduce           | 0 |
| paroxetine AND stop*            | 0 |
| paroxetine AND withdraw*        | 1 |
| paroxetine AND terminat*        | 0 |
| paroxetine AND deprescrib*      | 0 |
| sertraline AND cease            | 3 |
| sertraline AND cessation        | 0 |
| sertraline AND discontinuation  | 1 |
| sertraline AND taper*           | 1 |
| sertraline AND reduce           | 6 |
| sertraline AND stop*            | 4 |
| sertraline AND withdraw*        | 0 |
| sertraline AND terminat*        | 1 |
| sertraline AND deprescrib*      | 0 |
| duloxetine AND cease            | 0 |
| duloxetine AND cessation        | 0 |
| duloxetine AND discontinuation  | 1 |
| duloxetine AND taper*           | 1 |
| duloxetine AND reduce           | 2 |
| duloxetine AND stop*            | 0 |
| duloxetine AND withdraw*        | 0 |
| duloxetine AND terminat*        | 0 |
| duloxetine AND deprescrib*      | 0 |
| venlafaxine AND cease           | 0 |
| venlafaxine AND cessation       | 0 |
| venlafaxine AND discontinuation | 0 |
| venlafaxine AND taper*          | 5 |
| venlafaxine AND reduce          | 1 |
| venlafaxine AND stop*           | 0 |

|                                 |            |
|---------------------------------|------------|
| venlafaxine AND withdraw*       | 1          |
| venlafaxine AND terminat*       | 0          |
| venlafaxine AND deprescrib*     | 0          |
| mirtazapine AND cease           | 1          |
| mirtazapine AND cessation       | 0          |
| mirtazapine AND discontinuation | 0          |
| mirtazapine AND taper*          | 1          |
| mirtazapine AND reduce          | 1          |
| mirtazapine AND stop*           | 2          |
| mirtazapine AND withdraw*       | 2          |
| mirtazapine AND terminat*       | 0          |
| mirtazapine AND deprescrib*     | 0          |
|                                 |            |
| <b>Total number of hits</b>     | <b>278</b> |

## SUPPLEMENTAL TABLES 1-8

Supplemental Table 1: Excluded Studies

|    | Reference                                                                                                                                                                                                                                                                                                                                                                                                                                                               | Reason for exclusion                                                                       |
|----|-------------------------------------------------------------------------------------------------------------------------------------------------------------------------------------------------------------------------------------------------------------------------------------------------------------------------------------------------------------------------------------------------------------------------------------------------------------------------|--------------------------------------------------------------------------------------------|
| 1  | Anonymous. Home-based programme significantly reduces depressive symptoms and improves health status in chronically ill older adults with minor depression or dysthymia. <i>Evidence-Based Healthcare and Public Health</i> 2004;8(5):257-58. doi: <a href="http://dx.doi.org/10.1016/j.ehbc.2004.08.035">http://dx.doi.org/10.1016/j.ehbc.2004.08.035</a>                                                                                                              | Population has minor depression or dysthymia                                               |
| 2  | Apil SRA, Spinhoven P, Haffmans PMJ, et al. Two-year follow-up of a randomized controlled trial of stepped care cognitive behavioral therapy to prevent recurrence of depression in an older population. <i>International Journal of Geriatric Psychiatry</i> 2014;29(3):317-25. doi: <a href="http://dx.doi.org/10.1002/gps.4010">http://dx.doi.org/10.1002/gps.4010</a>                                                                                               | Intervention is not aimed at antidepressant reduction/discontinuation.                     |
| 3  | Aronson TA, Shukla S. Long-term continuation antidepressant treatment: A comparison study. <i>Journal of Clinical Psychiatry</i> 1989;50(8):285-89.                                                                                                                                                                                                                                                                                                                     | Population included some bipolar patients (>10%)                                           |
| 4  | Baldwin DS, Cooper JA, Huusom AKT, et al. A double-blind, randomized, parallel-group, flexible-dose study to evaluate the tolerability, efficacy and effects of treatment discontinuation with escitalopram and paroxetine in patients with major depressive disorder. <i>International Clinical Psychopharmacology</i> 2006;21(3):159-69. doi: <a href="http://dx.doi.org/10.1097/01.yic.0000194377.88330.1d">http://dx.doi.org/10.1097/01.yic.0000194377.88330.1d</a> | Intervention is not aimed at antidepressant reduction/discontinuation (interruption study) |
| 5  | Bialos D, Giller E, Jatlow P, et al. Recurrence of depression after discontinuation of long-term amitriptyline treatment. <i>American Journal of Psychiatry</i> 1982;139(3):325-9. doi: <a href="https://dx.doi.org/10.1176/ajp.139.3.325">https://dx.doi.org/10.1176/ajp.139.3.325</a>                                                                                                                                                                                 | Intervention is not aimed at antidepressant reduction/discontinuation                      |
| 6  | Bieling PJ, Hawley LL, Bloch RT, et al. Treatment-specific changes in decentering following mindfulness-based cognitive therapy versus antidepressant medication or placebo for prevention of depressive relapse. <i>Journal of Consulting and Clinical Psychology</i> 2012;80(3):365-72. doi: <a href="http://dx.doi.org/10.1037/a0027483">http://dx.doi.org/10.1037/a0027483</a>                                                                                      | Outcomes were cognitive changes (neither a primary nor secondary outcome of the review)    |
| 7  | Bockting CL, Spinhoven P, Wouters LF, et al. Long-term effects of preventive cognitive therapy in recurrent depression: a 5.5-year follow-up study. <i>Journal of Clinical Psychiatry</i> 2009;70(12):1621-8. doi: <a href="https://dx.doi.org/10.4088/JCP.08m04784blu">https://dx.doi.org/10.4088/JCP.08m04784blu</a>                                                                                                                                                  | Intervention is not aimed at antidepressant reduction/discontinuation                      |
| 8  | Bockting CLH, Schene AH, Koeter HWJ, et al. Preventing relapse/recurrence in recurrent depression with cognitive therapy: A randomized controlled trial. <i>Journal of Consulting and Clinical Psychology</i> 2005;73(4):647-57. doi: <a href="http://dx.doi.org/10.1037/0022-006X.73.4.647">http://dx.doi.org/10.1037/0022-006X.73.4.647</a>                                                                                                                           | Intervention is not aimed at antidepressant reduction/discontinuation                      |
| 9  | Bockting CLH, Smid NH, Koeter MWJ, et al. Enduring effects of Preventive Cognitive Therapy in adults remitted from recurrent depression: A 10 year follow-up of a randomized controlled trial. <i>Journal of Affective Disorders</i> 2015;185:188-94. doi: <a href="http://dx.doi.org/10.1016/j.jad.2015.06.048">http://dx.doi.org/10.1016/j.jad.2015.06.048</a>                                                                                                        | Intervention is not aimed at antidepressant reduction/discontinuation                      |
| 10 | Bockting CLH, Spinhoven P, Koeter MWJ, et al. Differential predictors of response to preventive cognitive therapy in recurrent depression: A 2-year prospective study. <i>Psychotherapy and Psychosomatics</i> 2006;75(4):229-36. doi: <a href="http://dx.doi.org/10.1159/000092893">http://dx.doi.org/10.1159/000092893</a>                                                                                                                                            | Intervention is not aimed at antidepressant reduction/discontinuation                      |
| 11 | Bockting CLH, Ten Doesschate MC, Spijker J, et al. Continuation and maintenance use of antidepressants in recurrent depression. <i>Psychotherapy and Psychosomatics</i> 2008;77(1):17-26. doi: <a href="http://dx.doi.org/10.1159/000110056">http://dx.doi.org/10.1159/000110056</a>                                                                                                                                                                                    | Observational study not concerning reduction/discontinuation of antidepressants            |
| 12 | Curtin F, Schulz P. Relapse prevention and antidepressants. <i>Lancet</i> 2003;361(9375):2158-59; author reply 59.                                                                                                                                                                                                                                                                                                                                                      | Letter concerning a systematic review                                                      |
| 13 | Dallal A, Chouinard G. Withdrawal and rebound symptoms associated with abrupt discontinuation of venlafaxine. <i>Journal of Clinical Psychopharmacology</i> 1998;18(4):343-44. doi: 10.1097/00004714-199808000-00017                                                                                                                                                                                                                                                    | Study design was case series                                                               |
| 14 | Dobson KS, Hollon SD, Dimidjian S, et al. Randomized Trial of Behavioral Activation, Cognitive Therapy, and Antidepressant Medication in the Prevention of Relapse and Recurrence in Major Depression. <i>Journal of Consulting and Clinical Psychology</i> 2008;76(3):468-77. doi: <a href="http://dx.doi.org/10.1037/0022-006X.76.3.468">http://dx.doi.org/10.1037/0022-006X.76.3.468</a>                                                                             | Intervention is not aimed at antidepressant reduction/discontinuation                      |

|    |                                                                                                                                                                                                                                                                                                                                                                                                  |                                                                                                                                                                                                       |
|----|--------------------------------------------------------------------------------------------------------------------------------------------------------------------------------------------------------------------------------------------------------------------------------------------------------------------------------------------------------------------------------------------------|-------------------------------------------------------------------------------------------------------------------------------------------------------------------------------------------------------|
| 15 | Fava GA, Rafanelli C, Cazzaro M, et al. Well-being therapy. A novel psychotherapeutic approach for residual symptoms of affective disorders. <i>Psychological Medicine</i> 1998;28(2):475-80. doi: <a href="http://dx.doi.org/10.1017/S0033291797006363">http://dx.doi.org/10.1017/S0033291797006363</a>                                                                                         | Intervention is not aimed at antidepressant reduction/discontinuation                                                                                                                                 |
| 16 | Flint AJ, Rifat SL. Recurrence of first-episode geriatric depression after discontinuation of maintenance antidepressants. <i>American Journal of Psychiatry</i> 1999;156(6):943-5. doi: <a href="https://dx.doi.org/10.1176/ajp.156.6.943">https://dx.doi.org/10.1176/ajp.156.6.943</a>                                                                                                         | Study of relapse prevention, not antidepressant discontinuation.                                                                                                                                      |
| 17 | Frank E, Kupfer DJ, Perel JM. Early recurrence in unipolar depression. <i>Archives of General Psychiatry</i> 1989;46(5):397-400.                                                                                                                                                                                                                                                                 | Study of relapse prevention, not antidepressant discontinuation.                                                                                                                                      |
| 18 | Godfrin KA, van Heeringen C. The effects of mindfulness-based cognitive therapy on recurrence of depressive episodes, mental health and quality of life: A randomized controlled study. <i>Behaviour Research and Therapy</i> 2010;48(8):738-46. doi: <a href="http://dx.doi.org/10.1016/j.brat.2010.04.006">http://dx.doi.org/10.1016/j.brat.2010.04.006</a>                                    | Intervention is not aimed at antidepressant reduction/discontinuation                                                                                                                                 |
| 19 | Howell CA, Turnbull DA, Beilby JJ, et al. Preventing relapse of depression in primary care: a pilot study of the "Keeping the blues away" program. <i>The Medical Journal of Australia</i> 2008;188(12 Suppl):S138-41.                                                                                                                                                                           | Intervention is not aimed at antidepressant reduction/discontinuation                                                                                                                                 |
| 20 | Huijbers MJ, Spinhoven P, Spijker J, et al. Adding mindfulness-based cognitive therapy to maintenance antidepressant medication for prevention of relapse/recurrence in major depressive disorder: Randomised controlled trial. <i>Journal of Affective Disorders</i> 2015;187:54-61. doi: <a href="http://dx.doi.org/10.1016/j.jad.2015.08.023">http://dx.doi.org/10.1016/j.jad.2015.08.023</a> | Intervention is not aimed at antidepressant reduction/discontinuation                                                                                                                                 |
| 21 | Kinser PA, Elswick RK, Kornstein S. Potential long-term effects of a mind-body intervention for women with major depressive disorder: sustained mental health improvements with a pilot yoga intervention. <i>Arch Psychiatr Nurs</i> 2014;28(6):377-83. doi: <a href="https://dx.doi.org/10.1016/j.apnu.2014.08.014">https://dx.doi.org/10.1016/j.apnu.2014.08.014</a>                          | Intervention is not aimed at antidepressant reduction/discontinuation                                                                                                                                 |
| 22 | Kuehner C. An evaluation of the 'Coping with Depression Course' for relapse prevention with unipolar depressed patients. <i>Psychotherapy and Psychosomatics</i> 2005;74(4):254-59. doi: <a href="http://dx.doi.org/10.1159/000085150">http://dx.doi.org/10.1159/000085150</a>                                                                                                                   | Intervention is not aimed at antidepressant reduction/discontinuation                                                                                                                                 |
| 23 | Ludman E, Katon W, Bush T, et al. Behavioural factors associated with symptom outcomes in a primary care-based depression prevention intervention trial. <i>Psychological Medicine</i> 2003;33(6):1061-70. doi: <a href="http://dx.doi.org/10.1017/S003329170300816X">http://dx.doi.org/10.1017/S003329170300816X</a>                                                                            | Intervention is not aimed at antidepressant reduction/discontinuation                                                                                                                                 |
| 24 | Ludman E, Von Korff M, Katon W, et al. The design, implementation, and acceptance of a primary care-based intervention to prevent depression relapse. <i>International Journal of Psychiatry in Medicine</i> 2000;30(3):229-45. doi: <a href="http://dx.doi.org/10.2190/44LK-28E9-RRJ5-KQVW">http://dx.doi.org/10.2190/44LK-28E9-RRJ5-KQVW</a>                                                   | Intervention is not aimed at antidepressant reduction/discontinuation                                                                                                                                 |
| 25 | Mago R, Crits-Christoph P. Prevention of recurrent depression with cognitive behavioral therapy. <i>Arch Gen Psychiatry</i> 1999;56(5):479-80. [published Online First: 1999/05/08]                                                                                                                                                                                                              | Letter commenting on a study already included in the review                                                                                                                                           |
| 26 | Meadows GN, Shawyer F, Enticott JC, et al. Mindfulness-based cognitive therapy for recurrent depression: A translational research study with 2-year follow-up. <i>Australian and New Zealand Journal of Psychiatry</i> 2014;48(8):743-55. doi: <a href="http://dx.doi.org/10.1177/0004867414525841">http://dx.doi.org/10.1177/0004867414525841</a>                                               | Intervention is not aimed at antidepressant reduction/discontinuation                                                                                                                                 |
| 27 | Michelson D, Fava M, Amsterdam J, et al. Interruption of selective serotonin reuptake inhibitor treatment: Double-blind, placebo-controlled trial. <i>British Journal of Psychiatry</i> 2000;176(APR.):363-68. doi: <a href="http://dx.doi.org/10.1192/bjp.176.4.363">http://dx.doi.org/10.1192/bjp.176.4.363</a>                                                                                | Intervention is not aimed at antidepressant reduction/discontinuation (interruption study)                                                                                                            |
| 28 | Montgomery SA, Fava M, Padmanabhan SK, et al. Discontinuation symptoms and taper/poststudy-emergent adverse events with desvenlafaxine treatment for major depressive disorder. <i>International Clinical Psychopharmacology</i> 2009;24(6):296-305. doi: <a href="http://dx.doi.org/10.1097/YIC.0b013e32832fbb5a">http://dx.doi.org/10.1097/YIC.0b013e32832fbb5a</a>                            | Study design was pooled analysis of prevalence and type of discontinuation symptoms after antidepressant discontinuation during or at the end of placebo controlled trials of treatment of depression |
| 29 | Mourad I, Lejoyeux M, Ades J. [Prospective evaluation of antidepressant discontinuation]. <i>Encephale</i> 1998;24(3):215-22.                                                                                                                                                                                                                                                                    | Study design was case series                                                                                                                                                                          |
| 30 | Omid A, Mohammadkhani P, Mohammadi A, et al. Comparing mindfulness based cognitive therapy and traditional cognitive behavior therapy with treatments as usual on reduction of major depressive disorder symptoms. <i>Iranian Red Crescent Medical Journal</i> 2013;15(2):142-46. doi: <a href="http://dx.doi.org/10.5812/ircmj.8018">http://dx.doi.org/10.5812/ircmj.8018</a>                   | Intervention is not aimed at antidepressant reduction/discontinuation                                                                                                                                 |

|    |                                                                                                                                                                                                                                                                                                                                                                                                                                                                                                |                                                                                            |
|----|------------------------------------------------------------------------------------------------------------------------------------------------------------------------------------------------------------------------------------------------------------------------------------------------------------------------------------------------------------------------------------------------------------------------------------------------------------------------------------------------|--------------------------------------------------------------------------------------------|
| 31 | Paykel ES, Scott J, Cornwall PL, et al. Duration of relapse prevention after cognitive therapy in residual depression: Follow-up of controlled trial. <i>Psychological Medicine</i> 2005;35(1):59-68. doi: <a href="http://dx.doi.org/10.1017/S003329170400282X">http://dx.doi.org/10.1017/S003329170400282X</a>                                                                                                                                                                               | Intervention is not aimed at antidepressant reduction/discontinuation                      |
| 32 | Paykel ES, Scott J, Teasdale JD, et al. Prevention of relapse in residual depression by cognitive therapy. A controlled trial. <i>Archives of General Psychiatry</i> 1999;56(9):829-35. doi: <a href="http://dx.doi.org/10.1001/archpsyc.56.9.829">http://dx.doi.org/10.1001/archpsyc.56.9.829</a>                                                                                                                                                                                             | Intervention is not aimed at antidepressant reduction/discontinuation                      |
| 33 | Perlis RH, Nierenberg AA, Alpert JE, et al. Effects of adding cognitive therapy to fluoxetine dose increase on risk of relapse and residual depressive symptoms in continuation treatment of major depressive disorder. <i>Journal of Clinical Psychopharmacology</i> 2002;22(5):474-80.                                                                                                                                                                                                       | Intervention is not aimed at antidepressant reduction/discontinuation                      |
| 34 | Petersen TJ, Pava JA, Buchin J, et al. The role of cognitive-behavioral therapy and fluoxetine in prevention of recurrence of major depressive disorder. <i>Cognitive Therapy and Research</i> 2010;34(1):13-23. doi: <a href="http://dx.doi.org/10.1007/s10608-007-9166-6">http://dx.doi.org/10.1007/s10608-007-9166-6</a>                                                                                                                                                                    | Intervention is not aimed at antidepressant reduction/discontinuation                      |
| 35 | Rosenbaum JF, Fava M, Hoog SL, et al. Selective serotonin reuptake inhibitor discontinuation syndrome: A randomized clinical trial. <i>Biological Psychiatry</i> 1998;44(2):77-87. doi: <a href="http://dx.doi.org/10.1016/S0006-3223(98)00126-7">http://dx.doi.org/10.1016/S0006-3223(98)00126-7</a>                                                                                                                                                                                          | Intervention is not aimed at antidepressant reduction/discontinuation (interruption study) |
| 36 | Scott J, Palmer S, Paykel E, et al. Use of cognitive therapy for relapse prevention in chronic depression: Cost-effectiveness study. <i>British Journal of Psychiatry</i> 2003;182(MAR.):221-27. doi: <a href="http://dx.doi.org/10.1192/bjp.182.3.221">http://dx.doi.org/10.1192/bjp.182.3.221</a>                                                                                                                                                                                            | Intervention is not aimed at antidepressant reduction/discontinuation                      |
| 37 | Segal ZV, Bieling P, Young T, et al. Antidepressant monotherapy vs sequential pharmacotherapy and mindfulness-based cognitive therapy, or placebo, for relapse prophylaxis in recurrent depression. <i>Archives of General Psychiatry</i> 2010;67(12):1256-64. doi: <a href="http://dx.doi.org/10.1001/archgenpsychiatry.2010.168">http://dx.doi.org/10.1001/archgenpsychiatry.2010.168</a>                                                                                                    | Intervention is not aimed at antidepressant reduction/discontinuation                      |
| 38 | Shawyer F, Meadows GN, Judd F, et al. The DARE study of relapse prevention in depression: Design for a phase 1/2 translational randomised controlled trial involving mindfulness-based cognitive therapy and supported self monitoring. <i>BMC Psychiatry</i> 2014;12 (1) (no pagination)(3) doi: <a href="http://dx.doi.org/10.1186/1471-244X-32-3">http://dx.doi.org/10.1186/1471-244X-32-3</a>                                                                                              | Intervention is not aimed at antidepressant reduction/discontinuation                      |
| 39 | Stangier U, Hilling C, Heidenreich T, et al. Maintenance cognitive-behavioral therapy and manualized psychoeducation in the treatment of recurrent depression: A multicenter prospective randomized controlled trial. <i>American Journal of Psychiatry</i> 2013;170(6):624-32. doi: <a href="http://dx.doi.org/10.1176/appi.ajp.2013.12060734">http://dx.doi.org/10.1176/appi.ajp.2013.12060734</a>                                                                                           | Intervention is not aimed at antidepressant reduction/discontinuation                      |
| 40 | Stant AD, TenVergert EM, Kluiter H, et al. Cost-effectiveness of a psychoeducational relapse prevention program for depression in primary care. <i>J Ment Health Policy Econ</i> 2009;12(4):195-204.                                                                                                                                                                                                                                                                                           | Intervention is not aimed at antidepressant reduction/discontinuation                      |
| 41 | Tang TZ, Derubeis RJ, Hollon SD, et al. Sudden gains in cognitive therapy of depression and depression relapse/recurrence. <i>J Consult Clin Psychol</i> 2007;75(3):404-8. doi: 10.1037/0022-006x.75.3.404 [published Online First: 2007/06/15]                                                                                                                                                                                                                                                | Intervention is not aimed at antidepressant reduction/discontinuation                      |
| 42 | Taylor MP, Reynolds CF, 3rd, Frank E, et al. Which elderly depressed patients remain well on maintenance interpersonal psychotherapy alone?: report from the Pittsburgh study of maintenance therapies in late-life depression. <i>Depress Anxiety</i> 1999;10(2):55-60.                                                                                                                                                                                                                       | Intervention is not aimed at antidepressant reduction/discontinuation                      |
| 43 | Teasdale JD, Segal ZV, Williams JM, et al. Prevention of relapse/recurrence in major depression by mindfulness-based cognitive therapy. <i>J Consult Clin Psychol</i> 2000;68(4):615-23.                                                                                                                                                                                                                                                                                                       | Intervention is not aimed at antidepressant reduction/discontinuation                      |
| 44 | Tint A, Haddad PM, Anderson IM. The effect of rate of antidepressant tapering on the incidence of discontinuation symptoms: a randomised study.[Erratum appears in <i>J Psychopharmacol</i> . 2009 Nov;23(8):1006]. <i>Journal of Psychopharmacology</i> 2008;22(3):330-2. doi: <a href="https://dx.doi.org/10.1177/0269881107087488">https://dx.doi.org/10.1177/0269881107087488</a><br><a href="https://dx.doi.org/10.1177/0269881107081550">https://dx.doi.org/10.1177/0269881107081550</a> | Intervention is not aimed at antidepressant reduction/discontinuation (interruption study) |
| 45 | Ulfvarson J, Adami J, Wredling R, et al. Controlled withdrawal of selective serotonin reuptake inhibitor drugs in elderly patients in nursing homes with no indication of depression. <i>European Journal of Clinical Pharmacology</i> 2003;59(10):735-40. doi: <a href="http://dx.doi.org/10.1007/s00228-003-0687-y">http://dx.doi.org/10.1007/s00228-003-0687-y</a>                                                                                                                          | Population had no history of indication for antidepressant use                             |

|    |                                                                                                                                                                                                                                                                                                                                                                              |                                                                                                                                                     |
|----|------------------------------------------------------------------------------------------------------------------------------------------------------------------------------------------------------------------------------------------------------------------------------------------------------------------------------------------------------------------------------|-----------------------------------------------------------------------------------------------------------------------------------------------------|
| 46 | van Geffen EC, Hugtenburg JG, Heerdink ER, et al. Discontinuation symptoms in users of selective serotonin reuptake inhibitors in clinical practice: tapering versus abrupt discontinuation. <i>European Journal of Clinical Pharmacology</i> 2005;61(4):303-7. doi: <a href="https://dx.doi.org/10.1007/s00228-005-0921-x">https://dx.doi.org/10.1007/s00228-005-0921-x</a> | Population was not described in terms of indication for antidepressant use. Study authors were contacted for details, but no response was received. |
| 47 | Von Korf M, Katon W, Rutter C, et al. Effect on Disability Outcomes of a Depression Relapse Prevention Program. <i>Psychosomatic Medicine</i> 2003;65(6):938-43. doi: <a href="http://dx.doi.org/10.1097/01.PSY.0000097336.95046.0C">http://dx.doi.org/10.1097/01.PSY.0000097336.95046.0C</a>                                                                                | Intervention is not aimed at antidepressant reduction/discontinuation                                                                               |
| 48 | Wang HN, Wang XX, Zhang RG, et al. Repetitive transcranial magnetic stimulation for the prevention of depressive relapse/recurrence: An assessor blind, randomized controlled trial. <i>Brain Stimulation</i> 2017;10(2):507-08. doi: <a href="http://dx.doi.org/10.1016/j.brs.2017.01.482">http://dx.doi.org/10.1016/j.brs.2017.01.482</a>                                  | Outcomes for those patients who discontinued antidepressants were not reported                                                                      |
| 49 | Williams JMG, Crane C, Barnhofer T, et al. Mindfulness-based cognitive therapy for preventing relapse in recurrent depression: A randomized dismantling trial. <i>Journal of Consulting and Clinical Psychology</i> 2014;82(2):275-86. doi: <a href="http://dx.doi.org/10.1037/a0035036">http://dx.doi.org/10.1037/a0035036</a>                                              | Intervention is not aimed at antidepressant reduction/discontinuation                                                                               |
| 50 | Williams JMG, Russell IT, Crane C, et al. Staying well after depression: Trial design and protocol. <i>BMC Psychiatry</i> 2010;10 (no pagination)(23) doi: <a href="http://dx.doi.org/10.1186/1471-244X-10-23">http://dx.doi.org/10.1186/1471-244X-10-23</a>                                                                                                                 | Intervention is not aimed at antidepressant reduction/discontinuation                                                                               |
| 51 | DRKS00006866. European Comparative Effectiveness Research on Internet-based Depression Treatment. 2014.                                                                                                                                                                                                                                                                      | Intervention is not aimed at antidepressant reduction/discontinuation                                                                               |
| 52 | NCT02747134. Combining Emotion Regulation and Mindfulness Skills for Preventing Depression Relapse. 2016.                                                                                                                                                                                                                                                                    | Intervention is not aimed at antidepressant reduction/discontinuation                                                                               |
| 53 | NCT02614326. MemFlex to Prevent Depressive Relapse. 2015.                                                                                                                                                                                                                                                                                                                    | Intervention is not aimed at antidepressant reduction/discontinuation                                                                               |
| 54 | NCT02029963. Can Magnetic Brain Stimulation Help Prevent Relapse in Depression? 2014.                                                                                                                                                                                                                                                                                        | Intervention is not aimed at antidepressant reduction/discontinuation                                                                               |
| 55 | NCT01807988. Internetbased Relapse Prevention for Partially Remitted Depression. 2013.                                                                                                                                                                                                                                                                                       | Intervention is not aimed at antidepressant reduction/discontinuation                                                                               |
| 56 | NCT01619930. The Effects of Behavioral Activation and Physical Exercise on Depression. 2012.                                                                                                                                                                                                                                                                                 | Intervention is not aimed at antidepressant reduction/discontinuation                                                                               |
| 57 | NCT00427128. Prozac Treatment of Major Depression: Discontinuation Study. 2007                                                                                                                                                                                                                                                                                               | Intervention is not aimed at antidepressant reduction/discontinuation                                                                               |
| 58 | NCT00218764. Cognitive Therapy Versus Medication Treatment for Preventing Depression Relapse. 2005.                                                                                                                                                                                                                                                                          | Intervention is not aimed at antidepressant reduction/discontinuation                                                                               |
| 59 | NCT00183664. Cognitive Therapy for Treating Depression and Preventing Relapse. 2005.                                                                                                                                                                                                                                                                                         | Intervention is not aimed at antidepressant reduction/discontinuation                                                                               |
| 60 | NCT00183560. Preventing Depression Relapse With Mindfulness-Based Cognitive Therapy. 2005.                                                                                                                                                                                                                                                                                   | Intervention is not aimed at antidepressant reduction/discontinuation.                                                                              |
| 61 | NCT00057577. Prevention of Recurrence in Depression With Drugs and CT. 2003.                                                                                                                                                                                                                                                                                                 | Intervention is not aimed at antidepressant reduction/discontinuation                                                                               |
| 62 | JPRN-UMIN000005896. The effect of psychoeducation for the prevent from recurrence of major depression and familial expressed emotion. 2011.                                                                                                                                                                                                                                  | Intervention is not aimed at antidepressant reduction/discontinuation                                                                               |
| 63 | JPRN-UMIN000005555. Family psychoeducation to prevent relapse/recurrent in the maintenance treatment of major depression: a randomized controlled trial. 2011.                                                                                                                                                                                                               | Intervention is not aimed at antidepressant reduction/discontinuation                                                                               |
| 64 | ISRCTN68246470. (Cost)effectiveness of a cognitive group prevention module for recurrent depression. 2006                                                                                                                                                                                                                                                                    | Intervention is not aimed at antidepressant reduction/discontinuation                                                                               |
| 65 | ISRCTN67561918. Psychotherapy for residual depression following initial treatment: effectiveness, relapse prevention and mechanisms of change. 2007.                                                                                                                                                                                                                         | Intervention is not aimed at antidepressant reduction/discontinuation                                                                               |
| 66 | ISRCTN64953693. An integrative online self-help program (Deprexis®) versus waitlist control for adults with depressive symptoms. 2009.                                                                                                                                                                                                                                       | Intervention is not aimed at antidepressant reduction/discontinuation                                                                               |
| 67 | ISRCTN58808893. An SMS-assisted mindfulness-based intervention for relapse prevention in depression. 2014.                                                                                                                                                                                                                                                                   | Intervention is not aimed at antidepressant reduction/discontinuation                                                                               |
| 68 | ISRCTN44812125. Cognitive training as a facilitated self-help relapse prevention for depression. 2010                                                                                                                                                                                                                                                                        | Intervention is not aimed at antidepressant reduction/discontinuation                                                                               |
| 69 | ISRCTN15969819. Antidepressants to prevent relapse in depression. 2015.                                                                                                                                                                                                                                                                                                      | Intervention is not aimed at antidepressant reduction/discontinuation                                                                               |
| 70 | ISRCTN12388725. E-COMPARED - internet-supported CBT for depression. 2015.                                                                                                                                                                                                                                                                                                    | Intervention is not aimed at antidepressant reduction/discontinuation                                                                               |

|    |                                                                                                                                                                                                   |                                                                       |
|----|---------------------------------------------------------------------------------------------------------------------------------------------------------------------------------------------------|-----------------------------------------------------------------------|
| 71 | IRCT201111298253N1. Effect of psychological intervention on symptoms and preventing recurrence depression. 2012.                                                                                  | Intervention is not aimed at antidepressant reduction/discontinuation |
| 72 | ChiCTR-INR-16007984. Evaluation of mindfulness-based cognitive therapy (MBCT) in the treatment of depression curative effect and relapse prevention function: A randomized controlled study. 2016 | Intervention is not aimed at antidepressant reduction/discontinuation |
| 73 | ACTRN12615001093572. Timely intervention: Efficacy of a depression symptom monitoring smartphone app to deliver psychological intervention at time of greatest need. 2015.                        | Intervention is not aimed at antidepressant reduction/discontinuation |
| 74 | ACTRN12613001204730. Opti-Med: A randomised controlled trial of deprescribing to optimise health outcomes for frail older people. 2013.                                                           | Intervention is deprescribing of variety of medications               |
| 75 | ACTRN12611000370909. Deprescribing in frail older people: a randomised controlled trial. 2011                                                                                                     | Intervention is deprescribing of variety of medications               |
| 76 | ACTRN12608000613303. Maintenance antidepressants versus treatment cessation in the prevention of depression recurrence. 2008.                                                                     | Intervention is not aimed at antidepressant reduction/discontinuation |
| 77 | ACTRN12607000166471. Effectiveness of Mindfulness-Based Cognitive Therapy Compared to Treatment-as-usual for Preventing Depressive Relapse in Subjects at Very High Risk. 2007.                   | Intervention is not aimed at antidepressant reduction/discontinuation |
| 78 | Intervention is not for antidepressant reduction/discontinuation                                                                                                                                  | Intervention is not aimed at antidepressant reduction/discontinuation |

## Supplemental Table 2: Study Characteristics

### Depression (exclusion or non-reporting of anxiety co-morbidities)

#### RCTs

| Study details                                                                                                                                                                                                                                                                                                                                              | Inclusion/exclusion criteria                                                                                                                                                                                                                                                                                                                                                                                                                                                                                                                                                                                                                                                                                                                                                                                                                                                                                                                                                                                                                                                                | Participant characteristics                                                                                                                                                                                                                                                                                                                    |
|------------------------------------------------------------------------------------------------------------------------------------------------------------------------------------------------------------------------------------------------------------------------------------------------------------------------------------------------------------|---------------------------------------------------------------------------------------------------------------------------------------------------------------------------------------------------------------------------------------------------------------------------------------------------------------------------------------------------------------------------------------------------------------------------------------------------------------------------------------------------------------------------------------------------------------------------------------------------------------------------------------------------------------------------------------------------------------------------------------------------------------------------------------------------------------------------------------------------------------------------------------------------------------------------------------------------------------------------------------------------------------------------------------------------------------------------------------------|------------------------------------------------------------------------------------------------------------------------------------------------------------------------------------------------------------------------------------------------------------------------------------------------------------------------------------------------|
| <b>Kahn 2014<sup>38</sup></b><br>Country: USA<br>Setting: 38 clinical research centres<br>Study design: Phase 4 study with 24 week open label phase (n=480) followed by randomised discontinuation phase (n=361)<br>Funding: Pfizer<br>Full publication: Yes (journal article)<br>Linked publications: Ninan 2015, <sup>39</sup> NCT01056289 <sup>40</sup> | <p><i>Inclusion criteria:</i> Male and female adult outpatients, 18 years or older, with a primary diagnosis of single or recurrent MDD without psychotic features based on the criteria from the DSM-IV, using the modified Mini International Neuropsychiatric Interview and depressive symptoms for at least 30 days before the screening visit and a 17-item Hamilton Rating Scale for Depression total score of 14 or greater at baseline. Patients who completed open label phase were then randomised to the 3 study arms (continuation of treatment, tapered discontinuation, abrupt discontinuation)</p> <p><i>Exclusion criteria:</i> Patients were excluded if they had a current diagnosis of an anxiety disorder that was considered to be primary; current psychoactive substance abuse or dependence; unstable hepatic, renal, pulmonary, cardiovascular (including uncontrolled hypertension, unstable angina, or recent myocardial infarction); ophthalmologic or neurologic disorder; or other clinically important medical disease (including uncontrolled diabetes)</p> | <p><i>Age (years), mean (SD):</i> INT: 47.9 (11.2); COMP 1: 47.8 (13.7), COMP 2: 46.7 (11.3)</p> <p><i>Female:</i> INT: 74%; COMP 1: 68%; COMP 2: 67%</p> <p><i>Depression diagnosis:</i> Major depressive disorder</p> <p><i>Antidepressant use:</i> desvenlafaxine 50mg per day</p> <p><i>Duration of antidepressant use (weeks):</i> 24</p> |
| Intervention details                                                                                                                                                                                                                                                                                                                                       | Comparator 1 details                                                                                                                                                                                                                                                                                                                                                                                                                                                                                                                                                                                                                                                                                                                                                                                                                                                                                                                                                                                                                                                                        | Comparator 2 details                                                                                                                                                                                                                                                                                                                           |
| <p><i>Name of intervention:</i> Tapered discontinuation; N=140</p> <p><i>Description:</i> desvenlafaxine 25 mg per day for 1 week followed by placebo for 3 weeks.</p> <p><i>Treatment duration (randomised phase):</i> 1 week taper + 3 weeks placebo.</p> <p><i>Delivery:</i> not reported</p> <p><i>Provider:</i> not reported</p>                      | <p><i>Name of intervention:</i> Abrupt discontinuation; N=148</p> <p><i>Description:</i> placebo for 4 weeks</p> <p><i>Treatment duration:</i> 4 weeks</p> <p><i>Delivery:</i> not reported</p> <p><i>Provider:</i> not reported</p>                                                                                                                                                                                                                                                                                                                                                                                                                                                                                                                                                                                                                                                                                                                                                                                                                                                        | <p><i>Name of intervention:</i> Antidepressant continuation; N=73</p> <p><i>Description:</i> continued desvenlafaxine 50 mg per day treatment for 4 weeks</p> <p><i>Treatment duration:</i> not applicable</p> <p><i>Delivery:</i> not reported</p> <p><i>Provider:</i> not reported</p>                                                       |

| Study details                                                                                                                                                                                                                                                                                                                                                                                                                                                                                                                                                                                                                                                                                                                                                                                                                                                                                                                                                                                                         | Inclusion/exclusion criteria                                                                                                                                                                                                                                                                                                                                                                                                                                                                                                                                                                                                                                                                         | Participant characteristics                                                                                                                                                                                                                                                                                                                                                                                                                                        |
|-----------------------------------------------------------------------------------------------------------------------------------------------------------------------------------------------------------------------------------------------------------------------------------------------------------------------------------------------------------------------------------------------------------------------------------------------------------------------------------------------------------------------------------------------------------------------------------------------------------------------------------------------------------------------------------------------------------------------------------------------------------------------------------------------------------------------------------------------------------------------------------------------------------------------------------------------------------------------------------------------------------------------|------------------------------------------------------------------------------------------------------------------------------------------------------------------------------------------------------------------------------------------------------------------------------------------------------------------------------------------------------------------------------------------------------------------------------------------------------------------------------------------------------------------------------------------------------------------------------------------------------------------------------------------------------------------------------------------------------|--------------------------------------------------------------------------------------------------------------------------------------------------------------------------------------------------------------------------------------------------------------------------------------------------------------------------------------------------------------------------------------------------------------------------------------------------------------------|
| <p><b>Klein 2017<sup>42</sup></b></p> <p><i>Country:</i> Netherlands</p> <p><i>Setting:</i> Mental health care sites</p> <p><i>Study design:</i> Randomised controlled three-arm trial (only two arms (CT + taper versus m-ADM) were relevant as third arm was CT + mADM)</p> <p><i>Full publication:</i> No (protocol and secondary analysis published only. Study ended 06/2017 and there was no trial report at the time of the review searches)</p> <p><i>Linked publications:</i> Bockting 2011 (protocol),<sup>43</sup> ISRCTN15472145<sup>44</sup></p> <p><i>Funding:</i> Netherlands Organization for Health Research and Development (ZonMw), and Netherlands Organization for Scientific Research (NWO).</p>                                                                                                                                                                                                                                                                                                | <p><i>Inclusion criteria:</i> at least two previous depressive episodes in the past five years; currently in remission according to DSM-IV criteria for longer than 8 weeks and no longer than 2 years; have a current score of &lt;10 in the 17 item Hamilton Rating Scale for Depression; have been remitted on antidepressant treatment; use AD at entry in the study (delivered in primary or secondary care) for at least 6 months</p> <p><i>Exclusion criteria:</i> current mania or hypomania or a history of bipolar illness, any psychotic disorder (current and previous), organic brain damage, alcohol or drug dependency/abuse, predominant anxiety disorder</p>                        | <p>The data for the Klein paper were drawn from a multi-centre trial (n = 238) i.e. the Bockting trial, and an extension of this trial with additional experience sampling (n = 51). The patient characteristics reported in the Klein paper are for 289 patients (i.e. the Bockting trial + the extension). It is unclear from the Klein paper who the patients in the extension were. The characteristics for the 289 patients were therefore not extracted.</p> |
| Intervention details                                                                                                                                                                                                                                                                                                                                                                                                                                                                                                                                                                                                                                                                                                                                                                                                                                                                                                                                                                                                  | Comparator details                                                                                                                                                                                                                                                                                                                                                                                                                                                                                                                                                                                                                                                                                   |                                                                                                                                                                                                                                                                                                                                                                                                                                                                    |
| <p><i>Name:</i> Cognitive therapy with tapering of antidepressant (CT + taper); N=85</p> <p><i>Description:</i> CT: 8 weekly group sessions. Therapists of the sites will be trained with a CT manual to promote treatment integrity. Patients will be encouraged to do homework as prescribed. Taper: GP's and psychiatrists will be advised to taper antidepressants in 4 weeks to prevent withdrawal symptoms. In this arm patients will be asked for an intention to taper antidepressants. The patient is allowed to start antidepressants again at any time during the study.</p> <p><i>Treatment duration:</i> CT: 8 weekly sessions<br/>Taper: 4 weeks</p> <p><i>Delivery:</i> CT: group sessions,<br/>Taper: not reported</p> <p><i>Provider:</i> CT: A team of clinical psychologists from the University of Groningen, Rotterdam University and Maastricht University, and psychiatrists from the University of Amsterdam and the University of Groningen.<br/>Taper: guided by GPs and psychiatrists.</p> | <p><i>Name:</i> continuation of maintenance antidepressant medication (m-ADM); N = not reported. Antidepressant use: 87.8% SSRI</p> <p><i>Description:</i> GP's and psychiatrists will be advised to continue antidepressant prescription at minimal required adequate used dosage (≥ 20 mg Fluoxetine equivalent; as recommended by national guidelines). Patients will be encouraged to use medications prescribed and doctors/ psychiatrists will be encouraged to prescribe therapeutic dosages, as well as discuss problems with adherence frequently.</p> <p><i>Treatment duration:</i> not applicable</p> <p><i>Delivery:</i> not reported</p> <p><i>Provider:</i> GP's and psychiatrists</p> |                                                                                                                                                                                                                                                                                                                                                                                                                                                                    |

### Single arm trials

| Study details                                                                                                                                                                                                                                                                                                                                                                                                                                                                                                                                                                                                                                                                                                                                                                                                                                                                                                                                                                                                                                                                                                                                                                                                                                                                                                                                                                                                                                                                                                                                                                                                                                                                                                                                                                                                                                                                                                                                                                                                                                                                                                                                                                                                                                                                                                                                                                                                                                                                                                                            | Inclusion/exclusion criteria                                                                                                                                                                                                                                                                                                                                                                                                                                                                                                                                                                                                                                                                                                                                                                                                                                                                    | Participant characteristics                                                                                                                                                                                                                                                                                                                                                                                                    |
|------------------------------------------------------------------------------------------------------------------------------------------------------------------------------------------------------------------------------------------------------------------------------------------------------------------------------------------------------------------------------------------------------------------------------------------------------------------------------------------------------------------------------------------------------------------------------------------------------------------------------------------------------------------------------------------------------------------------------------------------------------------------------------------------------------------------------------------------------------------------------------------------------------------------------------------------------------------------------------------------------------------------------------------------------------------------------------------------------------------------------------------------------------------------------------------------------------------------------------------------------------------------------------------------------------------------------------------------------------------------------------------------------------------------------------------------------------------------------------------------------------------------------------------------------------------------------------------------------------------------------------------------------------------------------------------------------------------------------------------------------------------------------------------------------------------------------------------------------------------------------------------------------------------------------------------------------------------------------------------------------------------------------------------------------------------------------------------------------------------------------------------------------------------------------------------------------------------------------------------------------------------------------------------------------------------------------------------------------------------------------------------------------------------------------------------------------------------------------------------------------------------------------------------|-------------------------------------------------------------------------------------------------------------------------------------------------------------------------------------------------------------------------------------------------------------------------------------------------------------------------------------------------------------------------------------------------------------------------------------------------------------------------------------------------------------------------------------------------------------------------------------------------------------------------------------------------------------------------------------------------------------------------------------------------------------------------------------------------------------------------------------------------------------------------------------------------|--------------------------------------------------------------------------------------------------------------------------------------------------------------------------------------------------------------------------------------------------------------------------------------------------------------------------------------------------------------------------------------------------------------------------------|
| <p><b>Huijbers 2016<sup>34</sup></b></p> <p><i>Country:</i> Netherlands</p> <p><i>Setting:</i> 12 secondary and tertiary psychiatric out-patient clinics</p> <p><i>Study design:</i> Parallel two group non-inferiority RCT (only one arm (MBCT-TS) was relevant as second arm was MBCT+ maintenance antidepressant medication)</p> <p><i>Funding:</i> The Netherlands Organization for Health Research and Development (ZonMW)</p> <p><i>Full publication:</i> Yes (journal article)</p> <p><i>Linked publications:</i> Huijbers 2012,<sup>35</sup> Huijbers 2016,<sup>36</sup> NCT00928980<sup>37</sup></p>                                                                                                                                                                                                                                                                                                                                                                                                                                                                                                                                                                                                                                                                                                                                                                                                                                                                                                                                                                                                                                                                                                                                                                                                                                                                                                                                                                                                                                                                                                                                                                                                                                                                                                                                                                                                                                                                                                                            | <p><i>Inclusion criteria:</i> a history of at least three depressive episodes according to the DSM-IV; in full or partial remission, defined as not currently meeting the DSM-IV criteria for major depressive disorder; currently treated with antidepressants for at least 6 months; 18 years of age or older; and Dutch speaking</p> <p><i>Exclusion criteria:</i> bipolar disorder; any primary psychotic disorder (current and previous); clinically relevant neurological/somatic illness; current alcohol or drug dependency; high dosage of benzodiazepines (42 mg lorazepam equivalents daily); recent electroconvulsive therapy (53 months ago); previous MBCT and/or extensive meditation experience (for example retreats); current psychological treatment with a frequency of more than once per 3 weeks; and inability to complete interviews and self-report questionnaires</p> | <p><i>Age (years), mean (SD):</i> INT: 50.7 (10.6)</p> <p><i>Female:</i> INT: 72%</p> <p><i>Depression diagnosis at intake:</i> In full remission (<i>IDS-C</i> ≤11): INT: 70 (55%); In partial remission (<i>IDS-C</i> &gt;11): INT: 58 (45%)</p> <p><i>Antidepressant use:</i> SSRIs: INT: 92 (72%); TCAs: 26 (20%); Other (SNRI, mirtazapine, MAOI): 10 (8%)</p> <p><i>Duration of antidepressant use:</i> not reported</p> |
| Intervention details                                                                                                                                                                                                                                                                                                                                                                                                                                                                                                                                                                                                                                                                                                                                                                                                                                                                                                                                                                                                                                                                                                                                                                                                                                                                                                                                                                                                                                                                                                                                                                                                                                                                                                                                                                                                                                                                                                                                                                                                                                                                                                                                                                                                                                                                                                                                                                                                                                                                                                                     |                                                                                                                                                                                                                                                                                                                                                                                                                                                                                                                                                                                                                                                                                                                                                                                                                                                                                                 |                                                                                                                                                                                                                                                                                                                                                                                                                                |
| <p><i>Name of intervention:</i> Mindfulness based cognitive therapy followed by guided discontinuation of maintenance antidepressant medication (MBC-TS), N=128</p> <p><i>Description:</i> MBCT: MBCT largely based on the protocol by Segal, Williams &amp; Teasdale with some adaptations. The intervention consisted of 8 weekly sessions of 2.5 hours (instead of 2 hours) and 1 day of silent practice between the sixth and seventh session. MBCT included formal meditation exercises, such as the body scan, sitting meditation, walking meditation and mindful movement as well as informal exercises, such as bringing present-moment awareness to everyday activities. Cognitive-behavioural techniques included education, monitoring and scheduling of activities, identification of negative automatic thoughts and devising a relapse prevention plan. Participants were encouraged to practice meditation at home for about an hour a day using CDs.</p> <p>TS: Patients were asked and recommended to withdraw gradually from their antidepressants over a period of 5 weeks, starting after the seventh session of MBCT. A protocol for medication tapering developed for this study by two experts in pharmacological treatment of major depressive disorder was provided. For discontinuation a minimum of 3 and a maximum of 12 consultations during the follow-up period were recommended.</p> <p><i>Treatment duration:</i> MBCT: 8 consecutive weeks.</p> <p>TS: Patients were asked and recommended to withdraw gradually from their antidepressants over a period of 5 weeks starting after the seventh session of MBCT. Adherence to the study protocol was defined as attending four or more MBCT sessions, as in previous studies, and having fully discontinued maintenance antidepressant medication before the 6-month follow-up assessment (i.e. within 6 months after baseline and within approximately 3–4 months after the last MBCT session)</p> <p><i>Delivery:</i> MBCT: Group (8-12 participants). Groups were mixed comprising patients from both treatment groups as well as patients not included in the trial.</p> <p>TS: Face to face.</p> <p><i>Provider:</i> MBCT: provided in 12 different centres with a total of 19 teachers and 111 MBCT courses. MBCT teachers were trained in the study protocol for MBCT during a 3-day training retreat in the beginning of the project, as well as at three subsequent training days every 6 months.</p> <p>TS: supervised by psychiatrists.</p> |                                                                                                                                                                                                                                                                                                                                                                                                                                                                                                                                                                                                                                                                                                                                                                                                                                                                                                 |                                                                                                                                                                                                                                                                                                                                                                                                                                |

| Study details                                                                                                                                                                                                                                                                                                                                                                                                                                                                                                                                                                                                                                                                                                                                                                                                                                                                                                                                                                                                                                                                                                                                                                                                                                                                                                                                                                                                                                                                                                                                                                                                                                                                                                                                                            | Inclusion/exclusion criteria                                                                                                                                                                                                                                                                                                                                                                                                                                                                                                                                                                                                                                                                                                                                                                                                                                                                                                                                                                                                                                                                                                                                                                                                    | Participant characteristics                                                                                                                                                                                                                                                                                                                                                                               |
|--------------------------------------------------------------------------------------------------------------------------------------------------------------------------------------------------------------------------------------------------------------------------------------------------------------------------------------------------------------------------------------------------------------------------------------------------------------------------------------------------------------------------------------------------------------------------------------------------------------------------------------------------------------------------------------------------------------------------------------------------------------------------------------------------------------------------------------------------------------------------------------------------------------------------------------------------------------------------------------------------------------------------------------------------------------------------------------------------------------------------------------------------------------------------------------------------------------------------------------------------------------------------------------------------------------------------------------------------------------------------------------------------------------------------------------------------------------------------------------------------------------------------------------------------------------------------------------------------------------------------------------------------------------------------------------------------------------------------------------------------------------------------|---------------------------------------------------------------------------------------------------------------------------------------------------------------------------------------------------------------------------------------------------------------------------------------------------------------------------------------------------------------------------------------------------------------------------------------------------------------------------------------------------------------------------------------------------------------------------------------------------------------------------------------------------------------------------------------------------------------------------------------------------------------------------------------------------------------------------------------------------------------------------------------------------------------------------------------------------------------------------------------------------------------------------------------------------------------------------------------------------------------------------------------------------------------------------------------------------------------------------------|-----------------------------------------------------------------------------------------------------------------------------------------------------------------------------------------------------------------------------------------------------------------------------------------------------------------------------------------------------------------------------------------------------------|
| <p><b>Psaros 2014<sup>50</sup></b></p> <p><i>Country:</i> USA</p> <p><i>Setting:</i> Massachusetts General Hospital Center for Women's Mental Health in Boston or health care provider within the community</p> <p><i>Study design:</i> Single arm trial</p> <p><i>Full publication:</i> Yes (journal article)</p> <p><i>Linked publications:</i> Psaros 2011<sup>51</sup></p> <p><i>Funding:</i> not reported</p>                                                                                                                                                                                                                                                                                                                                                                                                                                                                                                                                                                                                                                                                                                                                                                                                                                                                                                                                                                                                                                                                                                                                                                                                                                                                                                                                                       | <p><i>Inclusion criteria:</i> aged 18 years or older; planning pregnancy or in the first trimester of pregnancy; independently decided to discontinue their antidepressant; were on treatment with a stable dosage of an antidepressant for at least 4 weeks at the time of the first visit; met stable depression remission criteria for at least 6 months and received a score of less than or equal to 9 on the Hamilton Rating Scale for Depression (HRSD); and had a history of a unipolar major depressive disorder.</p> <p><i>Exclusion criteria:</i> demonstrated significant risk for self-harm or harm to others; had psychotic symptoms; met criteria for a primary diagnosis of schizophrenia, bipolar disorder, active eating disorder, dementia, delirium, or other cognitive disorder according to the Mini-International Neuropsychiatric Interview (MINI); had an active substance and or alcohol abuse disorder within 6 months before study entry; were currently using a mood stabilizer, antipsychotic, or antiepileptic; received CBT or interpersonal therapy within the last year; or had recently been diagnosed with a medical disorder that could mimic depressive symptoms (eg, hypothyroidism)</p> | <p><i>Age (years), mean (SD):</i> 34 (3.96)</p> <p><i>Female:</i> 100% (1 patient pregnant at baseline)</p> <p><i>Depression diagnosis Major unipolar depression:</i> n=11; <i>Minor unipolar depression:</i> n=1</p> <p><i>Antidepressant use: Bupropion:</i> n=3; <i>Sertraline:</i> n=5; <i>Fluoxetine:</i> n=2; <i>Citalopram:</i> n=2</p> <p><i>Duration of antidepressant use:</i> not reported</p> |
| Intervention details                                                                                                                                                                                                                                                                                                                                                                                                                                                                                                                                                                                                                                                                                                                                                                                                                                                                                                                                                                                                                                                                                                                                                                                                                                                                                                                                                                                                                                                                                                                                                                                                                                                                                                                                                     |                                                                                                                                                                                                                                                                                                                                                                                                                                                                                                                                                                                                                                                                                                                                                                                                                                                                                                                                                                                                                                                                                                                                                                                                                                 |                                                                                                                                                                                                                                                                                                                                                                                                           |
| <p><i>Name:</i> cognitive behavioural therapy for the prevention of recurrence plus taper (CBT + taper); N=12</p> <p><i>Description:</i> CBT: The CBT therapy used for this study followed the general principles of CBT with an emphasis on identifying and modifying maladaptive patterns of thinking and behaviour that may trigger or expose vulnerabilities for depression, particularly in the context of trying to conceive. For the acute treatment phase, visits included a baseline assessment, 12 sessions of CBT, and bimonthly independent assessments. The acute phase included 6 modules that focused on the following topics: presentation of the CBT model for depression, motivational interviewing, relaxation strategies, activity scheduling, cognitive restructuring, problem solving, and assertiveness. Participants could complete up to 3 optional monthly CBT booster sessions (with an additional 2 independent assessments) over the follow-up phase</p> <p><i>Taper:</i> Drug taper schedules were determined at the baseline visit based on what was clinically appropriate for the medication and the preference of the participant. Typically, doses of medication were tapered at a rate of approximately 25% per week. The mean (SD) for the length of AD taper was 4.3 (2.53) weeks (range, 1–9 weeks).</p> <p><i>Treatment duration:</i> acute phase (16 weeks), booster phase (12 weeks)</p> <p><i>Delivery:</i> Face to face</p> <p><i>Provider:</i> CBT sessions were conducted by a PhD level psychologist specifically trained in CBT.</p> <p><i>Taper:</i> Drug taper schedules were determined at the baseline visit by participants in collaboration with staff physicians of the MGH Center for Women's Mental Health;</p> |                                                                                                                                                                                                                                                                                                                                                                                                                                                                                                                                                                                                                                                                                                                                                                                                                                                                                                                                                                                                                                                                                                                                                                                                                                 |                                                                                                                                                                                                                                                                                                                                                                                                           |

## Observational studies

| Study details                                                                                                                                                                                                                                                                                                                                                                                                                                                                                                                                                                                                                                                                                                                                                                                                                                                                                                                                                                                                                                                                                                                                                                                             | Inclusion/exclusion criteria                                                                                                                                                                                                                                                                                                                                                                                                                                                                                                                                                                                                                                                                                                                                                                                                                                                                                                                                                                                                                                                                                                                                                                        | Participant characteristics                                                                                                                                                                                                                                                                                                                                                                                                                                                                                                          |
|-----------------------------------------------------------------------------------------------------------------------------------------------------------------------------------------------------------------------------------------------------------------------------------------------------------------------------------------------------------------------------------------------------------------------------------------------------------------------------------------------------------------------------------------------------------------------------------------------------------------------------------------------------------------------------------------------------------------------------------------------------------------------------------------------------------------------------------------------------------------------------------------------------------------------------------------------------------------------------------------------------------------------------------------------------------------------------------------------------------------------------------------------------------------------------------------------------------|-----------------------------------------------------------------------------------------------------------------------------------------------------------------------------------------------------------------------------------------------------------------------------------------------------------------------------------------------------------------------------------------------------------------------------------------------------------------------------------------------------------------------------------------------------------------------------------------------------------------------------------------------------------------------------------------------------------------------------------------------------------------------------------------------------------------------------------------------------------------------------------------------------------------------------------------------------------------------------------------------------------------------------------------------------------------------------------------------------------------------------------------------------------------------------------------------------|--------------------------------------------------------------------------------------------------------------------------------------------------------------------------------------------------------------------------------------------------------------------------------------------------------------------------------------------------------------------------------------------------------------------------------------------------------------------------------------------------------------------------------------|
| <p><b>Himeji 2006<sup>53</sup></b></p> <p><i>Country:</i> Japan</p> <p><i>Setting:</i> The clinical records of patients treated during the previous 5 years in the outpatient units of the Shindome Abuyama Clinic and Shin-Abuyama Hospital, Osaka.</p> <p><i>Study design:</i> Retrospective cohort</p> <p><i>Full publication:</i> Yes (journal article)</p> <p><i>Linked publications:</i> None</p> <p><i>Funding:</i> None</p>                                                                                                                                                                                                                                                                                                                                                                                                                                                                                                                                                                                                                                                                                                                                                                       | <p><i>Inclusion criteria:</i> had experienced a single episode of MDD diagnosed according to DSM-IV criteria; were given paroxetine as the only pharmacological treatment for their depression; had no comorbid substance dependence or abuse; and were no longer taking paroxetine for the treatment of depression.</p> <p><i>Exclusion criteria:</i> patients who were even moderately clinically depressed, anxious, or hypomanic at the time of medication discontinuation as well as those whose rate of discontinuation was uncertain (22.3% of potential antidepressant-treated candidates).</p>                                                                                                                                                                                                                                                                                                                                                                                                                                                                                                                                                                                             | <p><i>Age (years), mean (SD):</i> OUTCOME 1: 40.5 (7.8); OUTCOME 2 : mean 37.2 (8.0) (statistical difference between groups)</p> <p><i>Female:</i> OUTCOME 1: n=44%; OUTCOME 2: n=46%</p> <p><i>Depression:</i> MDD diagnosed according to DSM IV criteria</p> <p><i>Antidepressant use:</i> Paroxetine only.</p> <p><i>Maintenance dose, mean (SD):</i> OUTCOME 1: 25.9mg/day (9.9); OUTCOME 2: 26.6mg/day (10.2)</p> <p><i>Duration of antidepressant use (months):</i> OUTCOME 1: mean 9.2 SD 4.1; OUTCOME 2: mean 9.9 SD 4.2</p> |
| Outcome1 details                                                                                                                                                                                                                                                                                                                                                                                                                                                                                                                                                                                                                                                                                                                                                                                                                                                                                                                                                                                                                                                                                                                                                                                          | Outcome 2 details                                                                                                                                                                                                                                                                                                                                                                                                                                                                                                                                                                                                                                                                                                                                                                                                                                                                                                                                                                                                                                                                                                                                                                                   |                                                                                                                                                                                                                                                                                                                                                                                                                                                                                                                                      |
| <p><i>Name:</i> Non discontinuation syndrome; N=344 (abrupt (n=53) or gradual (n=291) withdrawal of paroxetine (10mg reduction every 2 weeks))</p> <p><i>Description:</i> clinical records were examined to determine whether patients had been diagnosed as having experienced the discontinuation syndrome on stopping paroxetine. If they had been, this diagnosis was reconfirmed according to the criteria for the SSRI discontinuation syndrome proposed by Black et al. These criteria are: (i) the symptoms of the discontinuation syndrome appear within 3 days following cessation/ reduction in the dosage of paroxetine; (ii) two or more of the following symptoms are present: dizziness, lightheadedness, headache, nausea, paresthesia, loss of balance, irritability, agitation and insomnia; (iii) the symptoms cannot be explained as a relapse of depression or as any other medical condition; and (iv) the symptoms cause significant distress or impairment in social, occupational and other important areas of functioning. The patients had been followed-up to the end of treatment and were assessed for relapse of depression 4 and 8 weeks after medication was stopped</p> | <p><i>Name:</i> Discontinuation syndrome; N=41 (abrupt (n=27) or gradual (n=14) withdrawal of paroxetine (10mg reduction every 2 weeks))</p> <p><i>Description:</i> clinical records were examined to determine whether patients had been diagnosed as having experienced the discontinuation syndrome on stopping paroxetine. If they had been, this diagnosis was reconfirmed according to the criteria for the SSRI discontinuation syndrome proposed by Black et al. These criteria are: (i) the symptoms of the discontinuation syndrome appear within 3 days following cessation/ reduction in the dosage of paroxetine; (ii) two or more of the following symptoms are present: dizziness, lightheadedness, headache, nausea, paresthesia, loss of balance, irritability, agitation and insomnia; (iii) the symptoms cannot be explained as a relapse of depression or as any other medical condition; and (iv) the symptoms cause significant distress or impairment in social, occupational and other important areas of functioning. The patients had been followed-up to the end of treatment and were assessed for relapse of depression 4 and 8 weeks after medication was stopped</p> |                                                                                                                                                                                                                                                                                                                                                                                                                                                                                                                                      |

## Depression and/ or anxiety disorders

### RCTs

| Study details                                                                                                                                                                                                                                                                                                                                                                                                                                                                                                                                                                                                                                                                                                                                                                                                                                                                                                                                                                                                                                                                                                                                                             | Inclusion/exclusion criteria                                                                                                                                                                                                                                                                                                                                                                                                                                                                                                                                                                                                                                                                                                                                                                                                                                                                      | Participant characteristics                                                                                                                                                                                                                                                                                                                                                                                                                                                                                                                                                                                                                                                                                                                                                                                       |
|---------------------------------------------------------------------------------------------------------------------------------------------------------------------------------------------------------------------------------------------------------------------------------------------------------------------------------------------------------------------------------------------------------------------------------------------------------------------------------------------------------------------------------------------------------------------------------------------------------------------------------------------------------------------------------------------------------------------------------------------------------------------------------------------------------------------------------------------------------------------------------------------------------------------------------------------------------------------------------------------------------------------------------------------------------------------------------------------------------------------------------------------------------------------------|---------------------------------------------------------------------------------------------------------------------------------------------------------------------------------------------------------------------------------------------------------------------------------------------------------------------------------------------------------------------------------------------------------------------------------------------------------------------------------------------------------------------------------------------------------------------------------------------------------------------------------------------------------------------------------------------------------------------------------------------------------------------------------------------------------------------------------------------------------------------------------------------------|-------------------------------------------------------------------------------------------------------------------------------------------------------------------------------------------------------------------------------------------------------------------------------------------------------------------------------------------------------------------------------------------------------------------------------------------------------------------------------------------------------------------------------------------------------------------------------------------------------------------------------------------------------------------------------------------------------------------------------------------------------------------------------------------------------------------|
| <p><b>Eveleigh 2015<sup>27</sup></b></p> <p><i>Country:</i> Netherlands</p> <p><i>Setting:</i> 45 general practices</p> <p><i>Study design:</i> Two group cluster RCT</p> <p><i>Funding:</i> Netherlands Organization for Health Research and Development (ZonMw)</p> <p><i>Full publication:</i> Yes (PhD thesis)</p> <p><i>Linked publications:</i> Muskens 2013,<sup>28</sup> Eveleigh 2014<sup>29</sup></p>                                                                                                                                                                                                                                                                                                                                                                                                                                                                                                                                                                                                                                                                                                                                                           | <p><i>Inclusion criteria:</i> Long-term antidepressant use (<math>\geq 9</math> months). All antidepressants were included, except MAO-inhibitors; written informed consent.</p> <p><i>Exclusion criteria:</i> Current treatment in a psychiatric in- or outpatient clinic; appropriate use of long-term antidepressants according to the Dutch guidelines for depressive and anxiety disorders (i.e. a history of recurrent depression (<math>\geq 3</math> episodes) and/or a recurrent psychiatric disorder with at least two relapses after antidepressant discontinuation); history of psychosis, bipolar disorder, or obsessive compulsive disorder; current diagnosis of substance use disorder (excluding tobacco); non-psychiatric indication for long-term antidepressant usage, e.g. neuropathic pain; hearing impairment and/or insufficient understanding of the Dutch language.</p> | <p><i>Age (years), mean (SD):</i> INT: 56 (12.9); COMP: 56 (14)<br/> <i>Female:</i> INT: 71%; COMP: 68%</p> <p><i>Life time psychiatric diagnosis:</i> INT: n=53 (76%); COMP: n=48 (63%);<br/> <i>Depression:</i> INT: n=39 (57%); COMP: n=38 (46%); <i>Panic disorder /agoraphobia:</i> INT: 13 (19%); COMP: 13 (17%); <i>Generalized anxiety disorder:</i> INT: 22 (32%); COMP: 13 (17%); <i>Social phobia:</i> INT: 16 (23%); COMP: 20 (26%)</p> <p><i>Antidepressant use: SSRI:</i> INT: n=57 (81.4%); COMP: n=50 (65.8%);<br/> <i>SNRI:</i> INT: n=7 (10%); COMP: n=11 (14.5%); <i>Other (non TCA):</i> INT: n=2 (2.9%); COMP: n=10 (13.2%); <i>TCA:</i> INT: n=4 (5.7%); COMP: n=5 (6.6%)</p> <p><i>Duration of antidepressant use (years), median (range):</i> INT: 8.0 (1 to 48); COMP: 9.5 (1 to 56)</p> |
| Intervention details                                                                                                                                                                                                                                                                                                                                                                                                                                                                                                                                                                                                                                                                                                                                                                                                                                                                                                                                                                                                                                                                                                                                                      | Comparator details                                                                                                                                                                                                                                                                                                                                                                                                                                                                                                                                                                                                                                                                                                                                                                                                                                                                                |                                                                                                                                                                                                                                                                                                                                                                                                                                                                                                                                                                                                                                                                                                                                                                                                                   |
| <p><i>Name:</i> Letter to GP disclosing patient does not meet the criteria for a depressive or anxiety disorder in the past six months combined with a (patient-tailored) treatment recommendation to discontinue; N = 22 practices (70 patients)</p> <p><i>Description:</i> The GP receives a letter stating that the patient does not meet the criteria for a depressive or anxiety disorder in the past six months. In addition, he or she receives an information sheet with current guidelines on antidepressant tapering and information about the discontinuation syndrome, including a detailed scheme for tapering for each patient. Duration of tapering was primarily based on the dosage and the half-life of the different antidepressants. No treatment restrictions are imposed on GP or patient in case of relapse or onset of a new psychiatric disorder after discontinuation.</p> <p><i>Treatment duration:</i> Patient consultation with GP to discuss recommendation was approximately 3 months from baseline</p> <p><i>Delivery:</i> Letter to GP + face to face discussion of recommendation between GP and patient</p> <p><i>Provider:</i> GP</p> | <p><i>Name:</i> Usual care; N = 23 practices (76 patients)</p> <p><i>Description:</i> GPs were unaware which patients participated in this study and continued usual care. The control condition will consist of usual care and did not impose restrictions on GPs to deliver care or to refer to specialised mental health care, including the continuation or discontinuation of psychotropic drugs.</p> <p><i>Treatment duration:</i> not applicable</p> <p><i>Delivery:</i> Face to face</p> <p><i>Provider:</i> GP</p>                                                                                                                                                                                                                                                                                                                                                                       |                                                                                                                                                                                                                                                                                                                                                                                                                                                                                                                                                                                                                                                                                                                                                                                                                   |

| Study details                                                                                                                                                                                                                                                                                                                                                                                                                                                                                                                                                                                                                                                                                                                                                                                                                                                                                                                                                                                                                                                                                                                                                                                                       | Inclusion/exclusion criteria                                                                                                                                                                                                                                                                                                                                                                                                                                                                                                                                                                                                                                                                                                                                                                                                                                                                                                                                                                                                                                                                                                                           | Participant characteristics                                                                                                                                                                                                                                                                                                                                                                                                                                                                                                                                                                                                                                                                                                   |
|---------------------------------------------------------------------------------------------------------------------------------------------------------------------------------------------------------------------------------------------------------------------------------------------------------------------------------------------------------------------------------------------------------------------------------------------------------------------------------------------------------------------------------------------------------------------------------------------------------------------------------------------------------------------------------------------------------------------------------------------------------------------------------------------------------------------------------------------------------------------------------------------------------------------------------------------------------------------------------------------------------------------------------------------------------------------------------------------------------------------------------------------------------------------------------------------------------------------|--------------------------------------------------------------------------------------------------------------------------------------------------------------------------------------------------------------------------------------------------------------------------------------------------------------------------------------------------------------------------------------------------------------------------------------------------------------------------------------------------------------------------------------------------------------------------------------------------------------------------------------------------------------------------------------------------------------------------------------------------------------------------------------------------------------------------------------------------------------------------------------------------------------------------------------------------------------------------------------------------------------------------------------------------------------------------------------------------------------------------------------------------------|-------------------------------------------------------------------------------------------------------------------------------------------------------------------------------------------------------------------------------------------------------------------------------------------------------------------------------------------------------------------------------------------------------------------------------------------------------------------------------------------------------------------------------------------------------------------------------------------------------------------------------------------------------------------------------------------------------------------------------|
| <p><b>Fava 1994<sup>15</sup></b></p> <p><i>Country:</i> Italy</p> <p><i>Setting:</i> Outpatients referred to and treated in the Affective Disorders Program of the University of Bologna School of Medicine in Italy.</p> <p><i>Study design:</i> Parallel two group RCT</p> <p><i>Funding:</i> Partially supported by Ministero Universita e Ricerca Scientifica e Tecnologica; Consiglio Nazionale delle Ricerche; and Mental Health Project, Istituto Superiore di Sanità, Rome</p> <p><i>Full publication:</i> Yes (journal article)</p> <p><i>Linked publications:</i> Fava 1996,<sup>30</sup> Fava 1998<sup>31</sup></p>                                                                                                                                                                                                                                                                                                                                                                                                                                                                                                                                                                                      | <p><i>Inclusion criteria:</i> A current diagnosis of primary major depressive disorder according to the Research Diagnostic Criteria (RDC); successful response to 3 to 5 month's full antidepressant treatment administered by the same psychiatrist according to standardized protocol. After drug treatment, rated as "better" or "much better" according to Kellner's global rating scale of improvement, in full remission and in stage 3 of primary unipolar depression.</p> <p><i>Exclusion criteria:</i> history of manic, hypomanic, or cyclothymic features; history of active drug or alcohol abuse or dependence; history of personality disorder according to DSM-III-R criteria; history of antecedent dysthymia, active medical illness; no evidence of depressed mood after treatment, absence of residual symptoms.</p>                                                                                                                                                                                                                                                                                                               | <p><i>Age (years), mean (SD):</i> INT: 43 (2.3); COMP: 48.5 (3.3)</p> <p><i>Female:</i> INT: 60%; COMP: 75%</p> <p><i>Depression - residual symptoms after successful treatment:</i> All patients reported residual symptoms, with a mean of 2.7 (1.2) per patient. The most frequently reported symptoms were: generalized anxiety (73% of patients), somatic anxiety (55%), and irritability (40%).</p> <p><i>Antidepressant use:</i> <i>Amitriptyline:</i> INT: n=7 (35%); COMP: n=12 (60%); <i>Desipramine:</i> INT: n=6 (30%); COMP: n=2 (10%); <i>Imipramine:</i> INT: n=5 (25%); COMP: n=4 (20%); <i>Mianserin:</i> INT: n=2 (10%); COMP: n=2 (10%);</p> <p><i>Duration of antidepressant use (months):</i> 3 to 5</p> |
| Intervention details                                                                                                                                                                                                                                                                                                                                                                                                                                                                                                                                                                                                                                                                                                                                                                                                                                                                                                                                                                                                                                                                                                                                                                                                | Comparator details                                                                                                                                                                                                                                                                                                                                                                                                                                                                                                                                                                                                                                                                                                                                                                                                                                                                                                                                                                                                                                                                                                                                     |                                                                                                                                                                                                                                                                                                                                                                                                                                                                                                                                                                                                                                                                                                                               |
| <p><i>Name:</i> Cognitive behavioural therapy + tapering (CBT + taper); N=21 (tapering was not feasible for n=1, and they were excluded from further participation in the study, but included in analysis)</p> <p><i>Description:</i> Treatment consisted of 10 40-minute sessions once every other week. Antidepressant drugs were tapered at the rate of 25 mg of amitriptyline or its equivalent every other week, and then they were withdrawn completely. Cognitive therapy was conducted as described by Beck, and included strategies and techniques designed to help depressed patients correct their distorted views and maladaptive beliefs. Whenever appropriate, as in the case of residual symptoms related to anxiety, exposure strategies were planned with the patient. Patients already on benzodiazepines were allowed to continue to do so.</p> <p><i>Treatment duration:</i> 20 weeks (10 sessions, 1 every other week)</p> <p><i>Delivery:</i> Face to face</p> <p><i>Provider:</i> 1 psychiatrist, with extensive experience in affective disorders and cognitive behavioural psychotherapy, who had initially treated the patients. The psychiatrist performed treatment in both groups.</p> | <p><i>Name:</i> Clinical management + tapering (CM +); N=22 (tapering was not feasible for n=2, and they were excluded from further participation in the study, but included in analysis)</p> <p><i>Description:</i> Treatment consisted of 10 40-minute sessions once every other week. Antidepressant drugs were tapered at the rate of 25 mg of amitriptyline or its equivalent every other week, and then they were withdrawn completely. Clinical management consisted of monitoring medication tapering, reviewing the patient's clinical status, and providing the patient with support and advice if necessary. Interventions such as exposure strategies, diary work and cognitive restructuring were proscribed. Patients already on benzodiazepines were allowed to continue to do so.</p> <p><i>Treatment duration:</i> 20 weeks (10 sessions, 1 every other week)</p> <p><i>Delivery:</i> Face to face</p> <p><i>Provider:</i> 1 psychiatrist, with extensive experience in affective disorders and cognitive behavioural psychotherapy, who had initially treated the patients. The psychiatrist performed treatment in both groups.</p> |                                                                                                                                                                                                                                                                                                                                                                                                                                                                                                                                                                                                                                                                                                                               |

| Study details                                                                                                                                                                                                                                                                                                                                                                                                                                                                                                                                                                                                                                                                                                                                                                                                                                                                                                                                                                                                                                                                                                                                                                                                                                                                                                                                                                                                                                                                                                                                                                                                                                                                                                                            | Inclusion/exclusion criteria                                                                                                                                                                                                                                                                                                                                                                                                                                                                                                                                                                                                                                                                                                                                                                                                                                                                                                                                                                                                                                                                                                                                                                                                                                                                                                  | Participant characteristics                                                                                                                                                                                                                                                                                                                                                                                                                                                                                                                                                                                                                                                                                                                                                                                                                |
|------------------------------------------------------------------------------------------------------------------------------------------------------------------------------------------------------------------------------------------------------------------------------------------------------------------------------------------------------------------------------------------------------------------------------------------------------------------------------------------------------------------------------------------------------------------------------------------------------------------------------------------------------------------------------------------------------------------------------------------------------------------------------------------------------------------------------------------------------------------------------------------------------------------------------------------------------------------------------------------------------------------------------------------------------------------------------------------------------------------------------------------------------------------------------------------------------------------------------------------------------------------------------------------------------------------------------------------------------------------------------------------------------------------------------------------------------------------------------------------------------------------------------------------------------------------------------------------------------------------------------------------------------------------------------------------------------------------------------------------|-------------------------------------------------------------------------------------------------------------------------------------------------------------------------------------------------------------------------------------------------------------------------------------------------------------------------------------------------------------------------------------------------------------------------------------------------------------------------------------------------------------------------------------------------------------------------------------------------------------------------------------------------------------------------------------------------------------------------------------------------------------------------------------------------------------------------------------------------------------------------------------------------------------------------------------------------------------------------------------------------------------------------------------------------------------------------------------------------------------------------------------------------------------------------------------------------------------------------------------------------------------------------------------------------------------------------------|--------------------------------------------------------------------------------------------------------------------------------------------------------------------------------------------------------------------------------------------------------------------------------------------------------------------------------------------------------------------------------------------------------------------------------------------------------------------------------------------------------------------------------------------------------------------------------------------------------------------------------------------------------------------------------------------------------------------------------------------------------------------------------------------------------------------------------------------|
| <p><b>Fava 1998<sup>32</sup></b></p> <p><i>Country:</i> Italy</p> <p><i>Setting:</i> Outpatients referred to and treated in the Affective Disorders Program of the University of Bologna School of Medicine in Italy.</p> <p><i>Study design:</i> Parallel two group RCT</p> <p><i>Funding:</i> Partially supported by the "Mental Health Project," Istituto Superiore di Sanita and the "Ministero dell Universita e della Ricerca Scientifica e Tecnologica</p> <p><i>Full publication:</i> Yes (journal article)</p> <p><i>Linked publications:</i> Fava 2004<sup>33</sup></p>                                                                                                                                                                                                                                                                                                                                                                                                                                                                                                                                                                                                                                                                                                                                                                                                                                                                                                                                                                                                                                                                                                                                                        | <p><i>Inclusion criteria:</i> A current diagnosis of major depressive disorder according to the RDC for a Selected Group of Functional Disorders; 3 or more episodes of depression, with the immediately preceding episode being no more than 2 1/2 years before the onset of the present episode5; a minimum 10-week remission according to RDC (<math>\leq 2</math> symptoms present to no more than a mild degree with absence of functional impairment) between the index episode and the immediately preceding episode; a minimum global severity score of 7 for the current episode of depression; and successful response to antidepressant drugs administered by 2 psychiatrists according to a standardized protocol (use of TCAs, with gradual increases in dosages. Patients who could not tolerate TCAs were switched to SSRIs). After drug treatment, rated as "better" or "much better" according to global rating scale of improvement, in full remission and in stage 3 of primary unipolar depression.</p> <p><i>Exclusion criteria:</i> a history of manic, hypomanic, or cyclothymic features (i.e. bipolar depression); a history of active drug or alcohol abuse or dependence or of personality disorder according to DSM-IV criteria; a history of antecedent dysthymia; or active medical illness</p> | <p><i>Age (years), mean (SD):</i> INT: 45.1 (10.3); COMP: 48.7 (12.1)</p> <p><i>Female:</i> INT: 55%; COMP: 65%</p> <p><i>Depression – Pre-intervention scores for the Clinical Interview for Depression (CID), mean (SD):</i> INT 30.8, SD (3.3); COMP 29.7 (3.9)</p> <p><i>Comorbidities: Generalized anxiety disorder:</i> INT: n=6 (30%); COMP: n=4 (20%); <i>Agoraphobia:</i> INT: n=3 (15%); COMP: n=3 (15%); <i>Social phobia:</i> INT: n=0 (0%), COMP: n=1 (5%)</p> <p><i>Antidepressant use: Amitriptyline:</i> INT: n=7 (35%); COMP: n=7 (35%); <i>Imipramine:</i> INT: n= 5 (25%); COMP: n=5 (25%); <i>Desipramine:</i> INT: n=5 (25%); COMP: n=6 (30%); <i>Fluoxetine:</i> INT: n=2 (10%); COMP: n=2 (10%); <i>Sertraline:</i> INT: n=1 (5%); COMP: n=0 (0%)</p> <p><i>Duration of antidepressant use (months):</i> 3 to 5</p> |
| Intervention details                                                                                                                                                                                                                                                                                                                                                                                                                                                                                                                                                                                                                                                                                                                                                                                                                                                                                                                                                                                                                                                                                                                                                                                                                                                                                                                                                                                                                                                                                                                                                                                                                                                                                                                     | Comparator details                                                                                                                                                                                                                                                                                                                                                                                                                                                                                                                                                                                                                                                                                                                                                                                                                                                                                                                                                                                                                                                                                                                                                                                                                                                                                                            |                                                                                                                                                                                                                                                                                                                                                                                                                                                                                                                                                                                                                                                                                                                                                                                                                                            |
| <p><i>Name:</i> Cognitive behavioural therapy + tapering (CBT + taper); N=23 (tapering was not feasible for n=3 and they were excluded from further participation in the study, but included in analysis)</p> <p><i>Description:</i> 10 30-minute sessions once every other week. Antidepressant drug use was tapered at the rate of 25 mg of amitriptyline hydrochloride or its equivalent every other week, and then the drugs were withdrawn completely (in the last 2 sessions, all patients were drug free). Cognitive behavioural treatment consisted of the following 3 main ingredients: (1) CBT of residual symptoms of major depression. Cognitive therapy was conducted as described by Beck et al., (2) Lifestyle modification. Patients were instructed that depression is merely the consequence of a maladaptive lifestyle, which does not take life stress, interpersonal friction, excessive work, and inadequate rest into proper account The strategies used technically derived from lifestyle modification approaches that were effective in clinical cardiological studies. (3) Well-being therapy. In the last 2 or 3 sessions, a psychotherapeutic strategy for enhancing well-being was used based on Ryff and Singer's conceptual model of well-being as the result of self-acceptance, positive relations with others, autonomy, environmental mastery, purpose in life, and personal growth. A few patients were taking benzodiazepines at low doses and continued to do so throughout the study.</p> <p><i>Treatment duration:</i> 20 weeks (10 sessions, 1 every other week)</p> <p><i>Delivery:</i> Face to Face</p> <p><i>Provider:</i> 1 psychiatrist, who performed all treatments in both groups.</p> | <p><i>Name:</i> Clinical management + tapering (CM + taper); N=22 (tapering was not feasible for n=2, and they were excluded from further participation in the study, but included in analysis)</p> <p><i>Description:</i> 10 30-minute sessions once every other week. Antidepressant drug use was tapered at the rate of 25 mg of amitriptyline hydrochloride or its equivalent every other week, and then the drugs were withdrawn completely (in the last 2 sessions, all patients were drug free). Clinical management consisted of monitoring medication tapering, reviewing the patient's clinical status, and providing the patient with support and advice if necessary. Specific interventions such as exposure strategies, diary work, and cognitive restructuring were proscribed. The patient was encouraged to share the main events that took place in the previous 2 weeks. A few patients were taking benzodiazepines at low doses and continued to do so throughout the study.</p> <p><i>Treatment duration:</i> 20 weeks (10 sessions, 1 every other week)</p> <p><i>Delivery:</i> Face to Face</p> <p><i>Provider:</i> 1 psychiatrist, who performed all treatments in both groups</p>                                                                                                                    |                                                                                                                                                                                                                                                                                                                                                                                                                                                                                                                                                                                                                                                                                                                                                                                                                                            |

| Study details                                                                                                                                                                                                                                                                                                                                                                                                                                                                                                                                                                                                                                                                                                                                                                                                                                                                                                                                                                                                                                                                                                                                                                                                                                                                                                                                                                                                                                                                                                                                                                                                                                                                                                                                                                                                                                                                                              | Inclusion/exclusion criteria                                                                                                                                                                                                                                                                                                                                                                                                                                                                                                                                                                                                                                                                                                                                                                                                                                                | Participant characteristics                                                                                                                                                                                                                                                                                                                                                                                                                                                                                                                            |
|------------------------------------------------------------------------------------------------------------------------------------------------------------------------------------------------------------------------------------------------------------------------------------------------------------------------------------------------------------------------------------------------------------------------------------------------------------------------------------------------------------------------------------------------------------------------------------------------------------------------------------------------------------------------------------------------------------------------------------------------------------------------------------------------------------------------------------------------------------------------------------------------------------------------------------------------------------------------------------------------------------------------------------------------------------------------------------------------------------------------------------------------------------------------------------------------------------------------------------------------------------------------------------------------------------------------------------------------------------------------------------------------------------------------------------------------------------------------------------------------------------------------------------------------------------------------------------------------------------------------------------------------------------------------------------------------------------------------------------------------------------------------------------------------------------------------------------------------------------------------------------------------------------|-----------------------------------------------------------------------------------------------------------------------------------------------------------------------------------------------------------------------------------------------------------------------------------------------------------------------------------------------------------------------------------------------------------------------------------------------------------------------------------------------------------------------------------------------------------------------------------------------------------------------------------------------------------------------------------------------------------------------------------------------------------------------------------------------------------------------------------------------------------------------------|--------------------------------------------------------------------------------------------------------------------------------------------------------------------------------------------------------------------------------------------------------------------------------------------------------------------------------------------------------------------------------------------------------------------------------------------------------------------------------------------------------------------------------------------------------|
| <p><b>Kuyken 2008<sup>16</sup></b></p> <p><i>Country:</i> UK</p> <p><i>Setting:</i> Primary care settings across a range of urban and rural locations in Devon. Patients were identified from computerised practice databases</p> <p><i>Study design:</i> Parallel two group RCT, stratified by symptomatic status (HRSD <math>\geq</math> 8)</p> <p><i>Funding:</i> UK Medical Research Council</p> <p><i>Full publication:</i> Yes (journal article)</p> <p><i>Linked publications:</i> ISRCTN12720810 2006<sup>41</sup></p>                                                                                                                                                                                                                                                                                                                                                                                                                                                                                                                                                                                                                                                                                                                                                                                                                                                                                                                                                                                                                                                                                                                                                                                                                                                                                                                                                                             | <p><i>Inclusion criteria:</i> Patients aged 18 years or older; history of three or more previous episodes of depression meeting DSM IV criteria for depression, treated with therapeutic dose of antidepressants over the last 6 months and currently in full or partial remission.</p> <p><i>Exclusion criteria:</i> Comorbid diagnoses of current substance dependence; organic brain damage; current/past psychosis; bipolar disorder; persistent antisocial behaviour; persistent self-injury requiring clinical management/ therapy; unable to engage with MBCT for physical, practical, or other reasons (e.g., very disabling physical problem, unable to comprehend materials); and formal concurrent psychotherapy</p>                                                                                                                                             | <p><i>Age (years), mean (SD):</i> INT: 48.95 (10.55); COMP: 49.37 (11.84)</p> <p><i>Female:</i> INT: 77%; COMP: 76%</p> <p><i>Depression diagnosis at intake: In full remission:</i> INT: 69%; COMP: 66%; <i>In partial remission:</i> INT: 31%; COMP: 34%</p> <p><i>Number of comorbid DSM-IV Axis I psychiatric diagnoses, mean (SD):</i> INT: 0.83 (0.96); COMP: 1.04 (1.11)</p> <p><i>Antidepressant use: SSRIs:</i> 58%; <i>TCAs:</i> 22%; <i>Combination:</i> 20%</p> <p><i>Duration of antidepressant use (months):</i> <math>\geq</math> 6</p> |
| Intervention details                                                                                                                                                                                                                                                                                                                                                                                                                                                                                                                                                                                                                                                                                                                                                                                                                                                                                                                                                                                                                                                                                                                                                                                                                                                                                                                                                                                                                                                                                                                                                                                                                                                                                                                                                                                                                                                                                       | Comparator details                                                                                                                                                                                                                                                                                                                                                                                                                                                                                                                                                                                                                                                                                                                                                                                                                                                          |                                                                                                                                                                                                                                                                                                                                                                                                                                                                                                                                                        |
| <p><i>Name:</i> Mindfulness based cognitive therapy + support to taper/discontinue antidepressants (MBCT-TS); N=61</p> <p><i>Description:</i> MBCT: 2 hour sessions per week. Sessions content followed treatment protocol (Segal, Williams, &amp; Teasdale, 2002) and included guided mindfulness practices (i.e., body scan, sitting meditation, yoga); inquiry into patients' experience of these practices; review of weekly homework (i.e., 40 minutes of mindfulness practice per day and generalization of session learning); and teaching/discussion of cognitive– behavioural skills. An adequate dose of MBCT was defined as participation in at least four of the eight MBCT group sessions.</p> <p>TS: Study team provided guideline information to physicians and patients about typical tapering/discontinuation regimes and possible withdrawal effects. Patients and physicians prompted to begin discussing a tapering/discontinuation regime after 4–5 weeks of the MBCT groups. At the end of the MBCT groups, they were reminded to ensure a tapering/discontinuation regime was in place.</p> <p><i>Treatment duration:</i> MBCT: 8 consecutive weeks, followed by four follow-up sessions in the following year.</p> <p>TS: The research team asked that patients consider tapering/discontinuing their medication as soon following MBCT as they deemed appropriate and within 6 months of the MBCT group ending.</p> <p><i>Delivery:</i> Primary care settings with MBCT groups of 9–15 patients</p> <p><i>Provider:</i> MBCT: clinical psychologist or occupational therapist. Both therapists had undergone a training program taught by one of the developers of MBCT, had experience of running at least two supervised pilot groups, and had an ongoing personal mindfulness practice.</p> <p>TS: Tapering/discontinuation regimes determined by physicians and patients.</p> | <p><i>Name:</i> Maintenance antidepressant medication (m-ADM); N=62</p> <p><i>Description:</i> maintenance of the antidepressant medication treatment that was an inclusion criterion for the study. During the maintenance phase, physicians were asked to manage m-ADM in line with standard clinical practice and the British National Formulary. Protocol adherence was defined as continuing to take m-ADM at a therapeutic maintenance dose for the duration of the trial. Changes in medication sometimes occurred during the maintenance treatment stage, but physicians and patients were asked to ensure the dose remained within therapeutic limits.</p> <p><i>Treatment duration:</i> duration of trial (15 months)</p> <p><i>Delivery:</i> GPs were asked to meet with patients regularly to review their medication treatment.</p> <p><i>Provider:</i> GP</p> |                                                                                                                                                                                                                                                                                                                                                                                                                                                                                                                                                        |

| Study details                                                                                                                                                                                                                                                                                                                                                                                                                                                                                                                                                                                                                                                                                                                                                                                                                                                                                                                                                                                                                                                                                                                                                                                                                                                                                                                                                                                                                                                                                                                                                                                                                                                                                                                                                                                                                                                                                                                                                                                                                                                                                                                                                                                                                                                                                                                                                                                                                                                                                                                   | Inclusion/exclusion criteria                                                                                                                                                                                                                                                                                                                                                                                                                                                                                                                                                                                                                                                                                                                                                                                                                                                                                                                                                                                                                                                                                                                                                                                     | Participant characteristics                                                                                                                                                                                                                                                                                                                                                                                                                                                                                                                                                                                                               |
|---------------------------------------------------------------------------------------------------------------------------------------------------------------------------------------------------------------------------------------------------------------------------------------------------------------------------------------------------------------------------------------------------------------------------------------------------------------------------------------------------------------------------------------------------------------------------------------------------------------------------------------------------------------------------------------------------------------------------------------------------------------------------------------------------------------------------------------------------------------------------------------------------------------------------------------------------------------------------------------------------------------------------------------------------------------------------------------------------------------------------------------------------------------------------------------------------------------------------------------------------------------------------------------------------------------------------------------------------------------------------------------------------------------------------------------------------------------------------------------------------------------------------------------------------------------------------------------------------------------------------------------------------------------------------------------------------------------------------------------------------------------------------------------------------------------------------------------------------------------------------------------------------------------------------------------------------------------------------------------------------------------------------------------------------------------------------------------------------------------------------------------------------------------------------------------------------------------------------------------------------------------------------------------------------------------------------------------------------------------------------------------------------------------------------------------------------------------------------------------------------------------------------------|------------------------------------------------------------------------------------------------------------------------------------------------------------------------------------------------------------------------------------------------------------------------------------------------------------------------------------------------------------------------------------------------------------------------------------------------------------------------------------------------------------------------------------------------------------------------------------------------------------------------------------------------------------------------------------------------------------------------------------------------------------------------------------------------------------------------------------------------------------------------------------------------------------------------------------------------------------------------------------------------------------------------------------------------------------------------------------------------------------------------------------------------------------------------------------------------------------------|-------------------------------------------------------------------------------------------------------------------------------------------------------------------------------------------------------------------------------------------------------------------------------------------------------------------------------------------------------------------------------------------------------------------------------------------------------------------------------------------------------------------------------------------------------------------------------------------------------------------------------------------|
| <p><b>Kuyken 2015<sup>17</sup></b></p> <p><i>Country:</i> UK</p> <p><i>Setting:</i> General practices in urban and rural settings in Bristol, Exeter and East, North, and South Devon</p> <p><i>Study design:</i> Parallel two group RCT, stratified by locality and symptomatic status (GRID HAMD <math>\geq</math> 8)</p> <p><i>Funding:</i> National Institute for Health Research</p> <p><i>Full publication:</i> Yes (HTA report)</p> <p><i>Linked publications:</i>, Kuyken 2010,<sup>45</sup> Kuyken 2014,<sup>46</sup> Kuyken 2015,<sup>47</sup> ISRCTN26666654<sup>48</sup></p>                                                                                                                                                                                                                                                                                                                                                                                                                                                                                                                                                                                                                                                                                                                                                                                                                                                                                                                                                                                                                                                                                                                                                                                                                                                                                                                                                                                                                                                                                                                                                                                                                                                                                                                                                                                                                                                                                                                                        | <p><i>Inclusion criteria:</i> Patients aged 18 years or older, with a diagnosis of recurrent major depressive disorder in full or partial remission according to the DSM-IV, a history of three or more previous major depressive episodes in which depression was the primary disorder and it was not secondary to substance abuse, bereavement or a general medical condition, were on a therapeutic dose of ADM, and were open either to continue taking antidepressants for 2 years or to take part in a MBCT class and consider stopping their ADM.</p> <p><i>Exclusion criteria:</i> Depressed, as assessed using the Structured Clinical Interview for DSM-IV (SCID); had a comorbid diagnosis of current substance abuse (patients with previous substance abuse were eligible for inclusion as long as they were in sustained full remission); organic brain damage; current/past psychosis, including bipolar disorder; displayed persistent antisocial behaviour; engaged in persistent self-injury that required clinical management/therapy; were undergoing formal concurrent psychotherapy.</p>                                                                                                   | <p><i>Age (years), mean (SD):</i> INT: 50 (12); COMP: 49 (13)</p> <p><i>Female:</i> INT: 71%; COMP: 82%</p> <p><i>Depression diagnosis at intake:</i><br/> <i>Asymptomatic:</i> INT: 77%; COMP: 76%<br/> <i>Symptomatic:</i> INT: 23%; COMP: 24%</p> <p><i>No. of comorbid DSM-IV Axis I psychiatric diagnoses, mean (SD):</i> INT: 0.5 (0.9); COMP: 0.7 (0.9)</p> <p><i>Antidepressant use (weeks prescribed over 24 month follow up period): SSRIs: 21642.5; SNRIs: 2690; TCAs: 2586, Mirtazapine: 1541; Agomelatine: 64; Others: 32; Flupentixol: 24; Moclobemide: 14</i><br/> <i>Duration of antidepressant use:</i> not reported</p> |
| Intervention details                                                                                                                                                                                                                                                                                                                                                                                                                                                                                                                                                                                                                                                                                                                                                                                                                                                                                                                                                                                                                                                                                                                                                                                                                                                                                                                                                                                                                                                                                                                                                                                                                                                                                                                                                                                                                                                                                                                                                                                                                                                                                                                                                                                                                                                                                                                                                                                                                                                                                                            | Comparator details                                                                                                                                                                                                                                                                                                                                                                                                                                                                                                                                                                                                                                                                                                                                                                                                                                                                                                                                                                                                                                                                                                                                                                                               |                                                                                                                                                                                                                                                                                                                                                                                                                                                                                                                                                                                                                                           |
| <p><i>Name:</i> Mindfulness based cognitive therapy + support to taper/discontinue antidepressants (MBCT-TS); N=212</p> <p><i>Description:</i> MBCT: 2.25 hour sessions per week. Session content included guided mindfulness practices (i.e. body scan, sitting meditation, movement); inquiry into participants' experience of these practices; weekly review of home practice (i.e. 40 minutes of mindfulness practice per day with the guidance of a CD, bringing mindfulness into everyday life); and teaching of/dialogue around cognitive-behavioural skills. The original MBCT manual was adapted to include more work on developing a relapse/recurrence signature and response plan that explicitly included participants considering reduction/discontinuation of m-ADM. There were an additional four group reunion sessions during the first year of follow-up to provide ongoing support and rehearse the key components of the interventions. An adequate dose of MBCT was defined as participation in at least four of the eight MBCT group sessions.</p> <p>TS: Letters signed by the chief investigator and trial GP were sent to each participant's GP, copied to the participant, prompting the GP to have a discussion with the participant about a suitable tapering/discontinuation regime after 4–5 weeks of the MBCT-TS group. At the end of the MBCT-TS group another letter was sent reminding the GP to ensure that a tapering/discontinuation regime was in place. Study team wrote to participant and their GP after each follow-up reminding them that the trial was seeking to compare staying on antidepressants with taking part in mindfulness classes and stopping ADM. Participants who experienced a significant deterioration following tapering were encouraged to use the skills developed as part of the MBCT treatment. Actual timeline and regime used to taper were determined by physicians and participants Use of pain killers and sleeping tablets was allowed ( % usage was the same in both study arms).</p> <p><i>Treatment duration:</i> 8 consecutive weeks, followed by four follow-up sessions in the following year.</p> <p><i>Delivery:</i> one-to-one orientation session with the therapist followed by group sessions.</p> <p><i>Provider:</i> 4 MBCT therapists (2 clinical psychologists, 2 occupational therapists) with post-qualification experience averaging 19 years, extensive training and experience in leading MBCT groups (min. 4 years). TS: GPs</p> | <p><i>Name:</i> Maintenance antidepressant medication (m-ADM); N=212</p> <p><i>Description:</i> During the maintenance phase, physicians were asked to manage m-ADM in line with standard clinical practice and the British National Formulary (BNF). Trial GPs and psychiatrist provided materials for all participants and participating GPs on m-ADM and ongoing support as required. Participants were encouraged to adhere to medication for the full length of the trial by sending them letters signed by the chief investigator and their GP after each follow-up, reminding them that the trial was seeking to compare staying on antidepressants for 2 years with taking part in mindfulness classes and stopping ADM. Changes in medication sometimes occurred during the maintenance treatment stage but physicians and participants were asked to ensure that the dose remained within therapeutic limits. Use of pain killers and sleeping tablets was allowed (% usage was the same in both study arms).</p> <p><i>Treatment duration:</i> 24 months</p> <p><i>Delivery:</i> GPs were asked to meet with patients regularly to review their medication treatment.</p> <p><i>Provider:</i> GPs</p> |                                                                                                                                                                                                                                                                                                                                                                                                                                                                                                                                                                                                                                           |

### Single arm trials

| Study details                                                                                                                                                                                                                                                                                                                                                                                                                                                                                                                                                                                                                                                                                                                                                                                                                                                                                                                                                                                                                                                                                                                                                                                               | Inclusion/exclusion criteria                                                                                                                                                                                                                                                                                                                                                                                                                                                                                                                                                                                                                                                                                                                                                                                                                                                                                                                                                                                                                                                                                                                                                                                                          | Participant characteristics                                                                                                                                                                                                                                                                                                                                                                                                                                                                                                                                                                                                                                                                                                                      |
|-------------------------------------------------------------------------------------------------------------------------------------------------------------------------------------------------------------------------------------------------------------------------------------------------------------------------------------------------------------------------------------------------------------------------------------------------------------------------------------------------------------------------------------------------------------------------------------------------------------------------------------------------------------------------------------------------------------------------------------------------------------------------------------------------------------------------------------------------------------------------------------------------------------------------------------------------------------------------------------------------------------------------------------------------------------------------------------------------------------------------------------------------------------------------------------------------------------|---------------------------------------------------------------------------------------------------------------------------------------------------------------------------------------------------------------------------------------------------------------------------------------------------------------------------------------------------------------------------------------------------------------------------------------------------------------------------------------------------------------------------------------------------------------------------------------------------------------------------------------------------------------------------------------------------------------------------------------------------------------------------------------------------------------------------------------------------------------------------------------------------------------------------------------------------------------------------------------------------------------------------------------------------------------------------------------------------------------------------------------------------------------------------------------------------------------------------------------|--------------------------------------------------------------------------------------------------------------------------------------------------------------------------------------------------------------------------------------------------------------------------------------------------------------------------------------------------------------------------------------------------------------------------------------------------------------------------------------------------------------------------------------------------------------------------------------------------------------------------------------------------------------------------------------------------------------------------------------------------|
| <p><b>Johnson 2012<sup>49</sup></b></p> <p><i>Country:</i> Scotland</p> <p><i>Setting:</i> 4 CHCPs containing urban general practices in most deprived areas</p> <p><i>Study design:</i> Single arm intervention</p> <p><i>Funding:</i> HCP Local Enhanced Service and NHS GG&amp;C Mental Health Collaborative monies.</p> <p><i>Full publication:</i> Yes (journal article)</p> <p><i>Linked publications:</i> None</p>                                                                                                                                                                                                                                                                                                                                                                                                                                                                                                                                                                                                                                                                                                                                                                                   | <p><i>Inclusion criteria:</i> Patients prescribed the same antidepressant for <math>\geq 2</math> years were identified by community health and care partnerships (CHCPs) support staff using a data extraction tool specifically designed, developed and piloted to identify this patient group from individual General Practice Administration System Scotland systems. This tool identified patients prescribed an antidepressant within the previous 3 months and patients prescribed the same antidepressant for 2 years or more. This duration was chosen as current guidelines recommend up to 2 years antidepressant treatment for those at risk of relapse. Amitriptyline was excluded from the search due to its non-mental health uses. Duloxetine was included as an earlier audit of the data found that prescriptions for managing conditions other than depression were sparse.</p> <p><i>Exclusion criteria:</i> Patients were excluded if aged <math>&lt;18</math> years, under regular psychiatric care, had a GP face-to-face antidepressant review within the preceding 6 months, or were on the severe mental illness register (practices review this group as part of the Quality Outcomes Framework [QOF])</p> | <p><i>Age (years), mean (SD):</i> 54.4 (13.4)</p> <p><i>Female</i> (Demographic data were available for 94.4% (2691/2849) patients reviewed): 1975/2691</p> <p><i>Indication for antidepressant use (1929/284 (67.7%) had antidepressant indication recorded):</i> Depression: 65.0%, Mixed anxiety depression: 22%; Anxiety disorder: 10%; Other mental health 1, General medical; 1.5%.</p> <p><i>Antidepressant use:</i> Fluoxetine: 26.8%; Citalopram: 25.8%; Paroxetine: 8.7%; Venlafaxine: 7.3%; Trazodone: 6.7%; Sertraline: 6.2%; Mirtazapine: 6.1%; Dosulepin: 5.0%; Escitalopram: 2.4%; Lofepramine: 2.1%; Duloxetine: 1.1%; Other: 1.7%</p> <p><i>Duration of antidepressant use (years):</i> mean 5.5, SD 3.0, range 2.0 to 24.8</p> |
| Intervention details                                                                                                                                                                                                                                                                                                                                                                                                                                                                                                                                                                                                                                                                                                                                                                                                                                                                                                                                                                                                                                                                                                                                                                                        |                                                                                                                                                                                                                                                                                                                                                                                                                                                                                                                                                                                                                                                                                                                                                                                                                                                                                                                                                                                                                                                                                                                                                                                                                                       |                                                                                                                                                                                                                                                                                                                                                                                                                                                                                                                                                                                                                                                                                                                                                  |
| <p><i>Name of intervention:</i> GP face to face review with patient of clinical condition and medication; N=2849</p> <p><i>Description:</i> Practices were asked to review and submit forms for a proportion of all registered patients (equivalent to 30 per 4000 patients). Other than exclusion criteria, GPs were not provided with guidance or a sampling framework from which to select patients, therefore GPs were allowed to prioritise patients for review, permitting flexibility to pragmatically select patients they felt may benefit most, at the expense of introducing selection bias into the study. At review GPs completed a standardised review form recording: date of review, CHCP, practice, name of antidepressant(s), daily dose, changes in antidepressant therapy and any onward referral. Subsequent amendments were made to capture patients' age, sex, GP-defined indication, and duration of current antidepressant for CHCP-2 to 4.</p> <p><i>Treatment duration:</i> All practices in the four CHCPs reviewed patients once and CHCP-1 followed-up with a second review within 3 months of the first.</p> <p><i>Delivery:</i> Face to face</p> <p><i>Provider:</i> GP</p> |                                                                                                                                                                                                                                                                                                                                                                                                                                                                                                                                                                                                                                                                                                                                                                                                                                                                                                                                                                                                                                                                                                                                                                                                                                       |                                                                                                                                                                                                                                                                                                                                                                                                                                                                                                                                                                                                                                                                                                                                                  |

## Observational studies

| Study details                                                                                                                                                                                                                                                                                                                                                                                                                                                                                                                                                                                                                                                                                                                       | Inclusion/exclusion criteria                                                                                                                                                                                                                                                                                                                                                                                                                                                                                                                                                                                                                                                                                                                                                                                                                                                                                                                                                                                                                                                                                                                                                                                                                                                                                                                                                                                                                                                                                                                                                                                                                                                                                                                                                               | Participant characteristics                                                                                                                                                                                                                                                                                                                                                                                                                                                                                                                                                                                                                                                                                                                                                                                                                                                                                                                                                                                                                                                                                                                                                                                    |
|-------------------------------------------------------------------------------------------------------------------------------------------------------------------------------------------------------------------------------------------------------------------------------------------------------------------------------------------------------------------------------------------------------------------------------------------------------------------------------------------------------------------------------------------------------------------------------------------------------------------------------------------------------------------------------------------------------------------------------------|--------------------------------------------------------------------------------------------------------------------------------------------------------------------------------------------------------------------------------------------------------------------------------------------------------------------------------------------------------------------------------------------------------------------------------------------------------------------------------------------------------------------------------------------------------------------------------------------------------------------------------------------------------------------------------------------------------------------------------------------------------------------------------------------------------------------------------------------------------------------------------------------------------------------------------------------------------------------------------------------------------------------------------------------------------------------------------------------------------------------------------------------------------------------------------------------------------------------------------------------------------------------------------------------------------------------------------------------------------------------------------------------------------------------------------------------------------------------------------------------------------------------------------------------------------------------------------------------------------------------------------------------------------------------------------------------------------------------------------------------------------------------------------------------|----------------------------------------------------------------------------------------------------------------------------------------------------------------------------------------------------------------------------------------------------------------------------------------------------------------------------------------------------------------------------------------------------------------------------------------------------------------------------------------------------------------------------------------------------------------------------------------------------------------------------------------------------------------------------------------------------------------------------------------------------------------------------------------------------------------------------------------------------------------------------------------------------------------------------------------------------------------------------------------------------------------------------------------------------------------------------------------------------------------------------------------------------------------------------------------------------------------|
| <p><b>Baldessarini 2010<sup>52</sup></b></p> <p><i>Country:</i> Italy</p> <p><i>Setting:</i> the Lucio Bini Mood Disorders Center affiliated with the University of Cagliari in Sardinia</p> <p><i>Study design:</i> Retrospective cohort</p> <p><i>Full publication:</i> Yes (journal article)</p> <p><i>Linked publications:</i> No</p> <p><i>Funding:</i> Supported in part by the NIH; the Lucio Bini Private Donors Mood Disorders Research Fund; the Bruce J. Anderson Foundation and the McLean Private Donors Psychopharmacology Research Fund.</p>                                                                                                                                                                         | <p><i>Inclusion criteria:</i> consecutive patients who met the following criteria: diagnosed clinically with DSM-based recurrent major depressive disorder, bipolar I or II disorder, or panic disorder; received a tricyclic antidepressant (or the tricyclic-like tetracyclics maprotiline and mianserin), a modern antidepressant (serotonin reuptake inhibitors or bupropion, duloxetine, or venlafaxine), or more than one antidepressant, with or without a mood stabilizer, following standard clinical practices regarding drug selection and dosing in the study community; recovered from an antidepressant-treated index episode of a major depression or panic disorder, based on clinical euthymia and a score <math>\leq 7</math> on the Hamilton Depression Rating Scale sustained for at least 30 days (including patients with panic disorder evaluated with the same rating scale for consistency); discontinued medication electively for clinical or personal reasons over a known period of time, allowing categorization into groups based on rapid (1–7 days) or gradual (<math>\geq 2</math> weeks) discontinuation; remained clinically stable or euthymic for at least 1 week after discontinuing treatment; and remained under prospective observation for at least 1 year, during initial treatment and through a first new episode of major depression or panic disorder that met DSM-IV diagnostic criteria at clinical assessment. Follow-up was censored at 100 months.</p> <p><i>Exclusion criteria:</i> patients who were even moderately clinically depressed, anxious, or hypomanic at the time of medication discontinuation as well as those whose rate of discontinuation was uncertain (22.3% of potential antidepressant-treated candidates).</p> | <p><i>Age (years), mean (SD):</i> EXP 1: 44.1 (15.4); EXP 2: 39.5, (14.5) (Note: Data not reported by diagnosis i.e. data for MDD, panic disorder, BP I and BP II patients were combined)</p> <p><i>Female:</i> EXP 1: 69%; EXP 2: 61.7% (Note: Data not reported by diagnosis i.e. data for MDD, panic disorder, BP I and BP II patients were combined)</p> <p><i>Psychiatric diagnosis: Recurrent major depressive disorder</i> EXP 1: <math>n=118</math> (56.2%); EXP 2: 106 (56.4%); <i>Panic disorder:</i> EXP 1: <math>n=38</math> (18.1%); EXP 2: 37 (19.7%); <i>Bipolar II disorder:</i> EXP 1: 33 (15.7%); EXP 2: 29 (15.4%); <i>Bipolar I disorder:</i> EXP 1: 21 (10.0%); EXP 2: 16 (8.5%)</p> <p><i>Antidepressant use: TCA and tetracyclics (amprotiline and mianserin):</i> <math>n=249</math> (62.6%), <i>Modern antidepressants (SSRI, bupropion, duloxetine or venlafaxine):</i> <math>n=149</math> (37.4%), <i>Mood stabilisers:</i> <math>n=125</math> (31.5%), <i>Sedatives:</i> <math>n=255</math> (64.1%) (Note: Data not reported by diagnosis i.e. data for MDD, panic disorder, BP I and BP II patients were combined)</p> <p><i>Duration of antidepressant use:</i> not reported</p> |
| Exposure 1                                                                                                                                                                                                                                                                                                                                                                                                                                                                                                                                                                                                                                                                                                                          | Exposure 2                                                                                                                                                                                                                                                                                                                                                                                                                                                                                                                                                                                                                                                                                                                                                                                                                                                                                                                                                                                                                                                                                                                                                                                                                                                                                                                                                                                                                                                                                                                                                                                                                                                                                                                                                                                 |                                                                                                                                                                                                                                                                                                                                                                                                                                                                                                                                                                                                                                                                                                                                                                                                                                                                                                                                                                                                                                                                                                                                                                                                                |
| <p><i>Name:</i> Gradual discontinuation; <math>N=210</math></p> <p><i>Description:</i> Discontinuation <math>\geq 2</math> weeks (none of the patients tapered off in the 8 to 14 day range)</p> <p><i>Treatment duration:</i> not reported</p> <p><i>Delivery:</i> not reported</p> <p><i>Provider:</i> Decisions to discontinue treatment were clinical, not experimental; they were decided by the patient in 80.7% of cases and at the advice of the prescribing physician in 19.3% of cases. Gradual discontinuation was slightly more prevalent than rapid (53% compared with 47% of cases), Among study patients, adjunctive psychotropic medications were continued unchanged after discontinuation of antidepressants.</p> | <p><i>Name:</i> Rapid discontinuation ; <math>N=188</math></p> <p><i>Description:</i> discontinuation over 1- 7 days</p> <p><i>Treatment duration:</i> not reported</p> <p><i>Delivery:</i> not reported</p> <p><i>Provider:</i> Decisions to discontinue treatment were clinical, not experimental; they were decided by the patient in 80.7% of cases and at the advice of the prescribing physician in 19.3% of cases. Stopping abruptly or rapidly was almost always the patient's decision (94.1% of discontinuations) Among study patients, adjunctive psychotropic medications were continued unchanged after discontinuation of antidepressants.</p>                                                                                                                                                                                                                                                                                                                                                                                                                                                                                                                                                                                                                                                                                                                                                                                                                                                                                                                                                                                                                                                                                                                               |                                                                                                                                                                                                                                                                                                                                                                                                                                                                                                                                                                                                                                                                                                                                                                                                                                                                                                                                                                                                                                                                                                                                                                                                                |

## Ongoing studies

| Study details                                                                                                                                                                                                                                                                                                                                                                                                                                                                                                                                                                                                                                                                                                                                                                                                                                                                                                                                                                                                                                                                                                                                                                                                                                                                                                                                                                                                                                                                                                                                                                                                                                                                                                                                                                                                                                                                                                                                                                                                                                                                                                                                                                | Inclusion/exclusion criteria                                                                                                                                                                                                                                                                                                                                                                                                                                                                                                                                                                                                                                                                                                                                                                                                                                                                                                                                                                                                                  |
|------------------------------------------------------------------------------------------------------------------------------------------------------------------------------------------------------------------------------------------------------------------------------------------------------------------------------------------------------------------------------------------------------------------------------------------------------------------------------------------------------------------------------------------------------------------------------------------------------------------------------------------------------------------------------------------------------------------------------------------------------------------------------------------------------------------------------------------------------------------------------------------------------------------------------------------------------------------------------------------------------------------------------------------------------------------------------------------------------------------------------------------------------------------------------------------------------------------------------------------------------------------------------------------------------------------------------------------------------------------------------------------------------------------------------------------------------------------------------------------------------------------------------------------------------------------------------------------------------------------------------------------------------------------------------------------------------------------------------------------------------------------------------------------------------------------------------------------------------------------------------------------------------------------------------------------------------------------------------------------------------------------------------------------------------------------------------------------------------------------------------------------------------------------------------|-----------------------------------------------------------------------------------------------------------------------------------------------------------------------------------------------------------------------------------------------------------------------------------------------------------------------------------------------------------------------------------------------------------------------------------------------------------------------------------------------------------------------------------------------------------------------------------------------------------------------------------------------------------------------------------------------------------------------------------------------------------------------------------------------------------------------------------------------------------------------------------------------------------------------------------------------------------------------------------------------------------------------------------------------|
| <p><b>Molenaar 2016<sup>54</sup></b></p> <p><i>Country:</i> Netherlands</p> <p><i>Setting:</i> Not reported</p> <p><i>Study design:</i> Pragmatic multi-centre randomized controlled non-inferiority trial</p> <p><i>Full publication:</i> Protocol is published as a journal article</p> <p><i>Linked publications:</i> Lambregtse-Van Den Berg 2015<sup>55</sup></p> <p><i>Funding:</i> Netherlands Organization for Health Research and Development and Erasmus Medical Centre, Department of Psychiatry.</p>                                                                                                                                                                                                                                                                                                                                                                                                                                                                                                                                                                                                                                                                                                                                                                                                                                                                                                                                                                                                                                                                                                                                                                                                                                                                                                                                                                                                                                                                                                                                                                                                                                                             | <p><i>Inclusion criteria:</i> Women who are less than 16 weeks pregnant and use a SSRI primarily for depressive disorder, and are currently at least in remission or recovered,</p> <p><i>Exclusion criteria:</i> multiple pregnancy, as these women have a markedly increased obstetric risk, thereby threatening the homogeneity of the study population and thus potentially complicate the statistical analysis; insufficient proficiency in Dutch or English, since intervention is not yet available in other languages; severe medical conditions, such as oncology-related conditions or conditions that need urgent medical interventions, which involve treatment decisions overriding research participation; current mania or hypomania or a history of bipolar illness, suicidality and serious self-harm, any psychotic disorder (current and previous), current alcohol or drug misuse, predominant anxiety disorders and personality disorders that require psychotherapeutic treatment for more than 2 sessions a month.</p> |
| Intervention details                                                                                                                                                                                                                                                                                                                                                                                                                                                                                                                                                                                                                                                                                                                                                                                                                                                                                                                                                                                                                                                                                                                                                                                                                                                                                                                                                                                                                                                                                                                                                                                                                                                                                                                                                                                                                                                                                                                                                                                                                                                                                                                                                         | Comparator details                                                                                                                                                                                                                                                                                                                                                                                                                                                                                                                                                                                                                                                                                                                                                                                                                                                                                                                                                                                                                            |
| <p><i>Name:</i> Guided tapering of SSRI according to protocol with preventive cognitive therapy (STOP)</p> <p><i>Description:</i> Taper: Women will be referred to a psychiatrist trained in guiding tapering of SSRIs during pregnancy. They will plan and carry out SSRI discontinuation using an expert-based discontinuation protocol. The aim is to taper the use of SSRIs within four weeks, depending on patient preferences and on drug characteristics (e.g., half-life in the body). Preventive cognitive therapy: Trained psychologists will provide preventive cognitive therapy. This psychological intervention has proven to be effective in relapse prevention and the current manual was evaluated in previous studies. The preventive psychological intervention consists of a minimum of eight weekly VSee sessions. These sessions are led by professional psychologists trained in cognitive behavioural therapy and may occur at any time of the day. The focus of the sessions is on identifying and teaching the participants to challenge dysfunctional beliefs, enhance recall of positive feelings and cognitions and a personal prevention plan is developed in which it is specified how the participant can prevent a depressive episode in the future. For each session the participant will receive some assignments of approximately 10 min per day. There are no restrictions on the use of medication like sleeping pills, paracetamol, and mild tranquilizers.</p> <p><i>Treatment duration:</i> Taper: aim is to taper the use of SSRIs within four weeks, depending on patient preferences and on drug characteristics (e.g., half-life in the body).<br/>CT: The preventive psychological intervention consists of a minimum of eight weekly VSee sessions</p> <p><i>Delivery:</i> CT: The intervention will be applied through VSee (<a href="http://www.vsee.com">http:// www.vsee.com</a>), a HIPAA-compliant telehealth app</p> <p><i>Provider:</i> Taper: psychiatrist trained in guiding tapering of SSRIs during pregnancy<br/>CT: Sessions are led by professional psychologists trained in cognitive behavioural therapy</p> | <p><i>Name:</i> Continuation of SSRIs - usual care (GO)</p> <p><i>Description:</i> Women instructed to consult their doctor as they regularly do, in line with the pragmatic nature of the study. All the care that is provided will be monitored.</p> <p><i>Treatment duration:</i> not reported</p> <p><i>Delivery:</i> usual care</p> <p><i>Provider:</i> usual care</p>                                                                                                                                                                                                                                                                                                                                                                                                                                                                                                                                                                                                                                                                   |
| Study details                                                                                                                                                                                                                                                                                                                                                                                                                                                                                                                                                                                                                                                                                                                                                                                                                                                                                                                                                                                                                                                                                                                                                                                                                                                                                                                                                                                                                                                                                                                                                                                                                                                                                                                                                                                                                                                                                                                                                                                                                                                                                                                                                                | Inclusion/exclusion criteria                                                                                                                                                                                                                                                                                                                                                                                                                                                                                                                                                                                                                                                                                                                                                                                                                                                                                                                                                                                                                  |

|                                                                                                                                                                                                                                                                                                                                                                                                    |                                                                                                                                                                                                                                                                                                                                                                                                                                                                                                                                                                                                                                                                                                                                                                                                                                                                                                                                                                                                                                                                                                                                                                                                                                                                                                                                                                                                                                                                                                                                                                                                                                                                                                                                                                                                                                                  |
|----------------------------------------------------------------------------------------------------------------------------------------------------------------------------------------------------------------------------------------------------------------------------------------------------------------------------------------------------------------------------------------------------|--------------------------------------------------------------------------------------------------------------------------------------------------------------------------------------------------------------------------------------------------------------------------------------------------------------------------------------------------------------------------------------------------------------------------------------------------------------------------------------------------------------------------------------------------------------------------------------------------------------------------------------------------------------------------------------------------------------------------------------------------------------------------------------------------------------------------------------------------------------------------------------------------------------------------------------------------------------------------------------------------------------------------------------------------------------------------------------------------------------------------------------------------------------------------------------------------------------------------------------------------------------------------------------------------------------------------------------------------------------------------------------------------------------------------------------------------------------------------------------------------------------------------------------------------------------------------------------------------------------------------------------------------------------------------------------------------------------------------------------------------------------------------------------------------------------------------------------------------|
| <p><b>NCT02661828_2016</b><sup>56</sup></p> <p><i>Country:</i> USA</p> <p><i>Setting:</i> Not reported</p> <p><i>Study design:</i> RCT, open label</p> <p><i>Full publication:</i> Clinical trial.gov entry</p> <p><i>Linked publications:</i> None</p> <p><i>Funding:</i> Emory University</p>                                                                                                    | <p><i>Inclusion criteria:</i> Age 18-75 years; currently taking an FDA-approved antidepressant for at least four weeks on the list of approved medications: SSRIs (citalopram, escitalopram, fluoxetine, fluvoxamine, paroxetine, sertraline, vilazodone or vortioxetine), SNRIs (desvenlafaxine, duloxetine, levomilnacipran, venlafaxine) and other classes (amitriptyline, bupropion, desipramine, doxepin, mirtazapine, nefazodone, nortriptyline, phenelzine, selegiline, or tranylcypromine). Clomipramine, a tricyclic antidepressant approved for the treatment of OCD, will also be included, but will be classed as an SSRI for this study because inhibition of the serotonin transporter is its primary therapeutic mechanism; no longer wishes to take the antidepressant medication they are currently prescribed, due to one of the following reasons: 1) ineffective for symptoms; 2) intolerable side effect; 3) improvement of their illness for sufficient duration that it is clinically appropriate to consider tapering the medication; primary psychiatric diagnosis of major depressive disorder, an anxiety disorder, OCD, or PTSD and; ability to read and understand English language.</p> <p><i>Exclusion criteria:</i> Has met criteria at any time during their life for a primary psychotic disorder (e.g. schizophrenia), or dementia; meets criteria for DSM-5-defined substance use disorder within three months of the screening visit; currently taking two or more antidepressants; presents with a clinically significant suicide risk, as assessed by a study physician; presence of any unstable or central nervous system-related medical illness that would interfere with cognition or participation; women who are currently pregnant or lactating, or plan to become pregnant during the study.</p> |
| <p><b>Intervention details</b></p>                                                                                                                                                                                                                                                                                                                                                                 | <p><b>Comparator details</b></p>                                                                                                                                                                                                                                                                                                                                                                                                                                                                                                                                                                                                                                                                                                                                                                                                                                                                                                                                                                                                                                                                                                                                                                                                                                                                                                                                                                                                                                                                                                                                                                                                                                                                                                                                                                                                                 |
| <p><i>Name:</i> Two-Week Antidepressant Taper Regimen</p> <p><i>Description:</i> Two-Week Taper Regimen to discontinue medication. Days 1-7: 50% of baseline antidepressant dose taken; Days 8-14: 25% of baseline antidepressant dose taken; Day 15: Stop antidepressant.</p> <p><i>Treatment duration:</i> 2 weeks</p> <p><i>Delivery:</i> not reported</p> <p><i>Provider:</i> not reported</p> | <p><i>Name:</i> One-Week Antidepressant Taper Regimen</p> <p><i>Description:</i> One-Week Taper Regimen to discontinue medication. Days 1-3: 50% of baseline antidepressant dose taken; Days 4-7: 25% of baseline antidepressant dose taken; Day 8: Stop antidepressant.</p> <p><i>Treatment duration:</i> 1 week</p> <p><i>Delivery:</i> not reported</p> <p><i>Provider:</i> not reported</p>                                                                                                                                                                                                                                                                                                                                                                                                                                                                                                                                                                                                                                                                                                                                                                                                                                                                                                                                                                                                                                                                                                                                                                                                                                                                                                                                                                                                                                                  |

**Abbreviations:** COMP comparator; DSM-IV Diagnostic and Statistical Manual of Mental Disorders, 4th. Edition; EXP exposure; INT intervention; MDD major depressive disorder; SD standard deviation

Supplemental Table 3: Risk of Bias Assessment for RCTs

|               | Random sequence generation (selection bias) | Allocation concealment (selection bias) | Blinding of participants and personnel (performance bias) | Blinding of outcome assessment (detection bias) | Incomplete outcome data (attrition bias) | Selective reporting (reporting bias) |
|---------------|---------------------------------------------|-----------------------------------------|-----------------------------------------------------------|-------------------------------------------------|------------------------------------------|--------------------------------------|
| Eveleigh 2015 | ?                                           | +                                       | -                                                         | +                                               | +                                        | +                                    |
| Fava 1994     | ?                                           | ?                                       | -                                                         | ?                                               | +                                        | ?                                    |
| Fava 1998     | ?                                           | ?                                       | -                                                         | +                                               | +                                        | ?                                    |
| Khan 2014     | ?                                           | ?                                       | ?                                                         | ?                                               | +                                        | +                                    |
| Klein 2017    | ?                                           | ?                                       | -                                                         | +                                               | ?                                        |                                      |
| Kuyken 2008   | +                                           | +                                       | -                                                         | +                                               | +                                        | ?                                    |
| Kuyken 2015   | +                                           | +                                       | -                                                         | +                                               | +                                        | +                                    |

Selective outcome reporting was not assessed for Klein et al., 2017 as this paper was reporting a secondary analysis

Supplemental Table 4: Risk of Bias Assessment for Single-Arm Trials and Observational Studies

|                                                                                                                                                                                                                                                   | Baldessarini 2010 <sup>52</sup>                                                                                                                                                                                                                                                                                         | Himeiri 2006 <sup>53</sup>                                                                                                                                                                                                                                                                                                                                                                          | Johnson 2012 <sup>49</sup>                                                                                                                                                                                                                                                                                                                                                                                                                                    | Huijbers 2016 <sup>34</sup>                                                                                                                                                                                                                                                                           | Psaros 2014 <sup>50</sup>                                                                                                                                                                                                                                                                                                          |
|---------------------------------------------------------------------------------------------------------------------------------------------------------------------------------------------------------------------------------------------------|-------------------------------------------------------------------------------------------------------------------------------------------------------------------------------------------------------------------------------------------------------------------------------------------------------------------------|-----------------------------------------------------------------------------------------------------------------------------------------------------------------------------------------------------------------------------------------------------------------------------------------------------------------------------------------------------------------------------------------------------|---------------------------------------------------------------------------------------------------------------------------------------------------------------------------------------------------------------------------------------------------------------------------------------------------------------------------------------------------------------------------------------------------------------------------------------------------------------|-------------------------------------------------------------------------------------------------------------------------------------------------------------------------------------------------------------------------------------------------------------------------------------------------------|------------------------------------------------------------------------------------------------------------------------------------------------------------------------------------------------------------------------------------------------------------------------------------------------------------------------------------|
| <b>1. Was the research question or objective in this paper clearly stated?</b>                                                                                                                                                                    | Yes - p.934,935                                                                                                                                                                                                                                                                                                         | Yes - p.665,666                                                                                                                                                                                                                                                                                                                                                                                     | Yes - p.773                                                                                                                                                                                                                                                                                                                                                                                                                                                   | Yes - p.366                                                                                                                                                                                                                                                                                           | Yes - p.3                                                                                                                                                                                                                                                                                                                          |
| <b>2. Was the study population clearly specified and defined?</b>                                                                                                                                                                                 | Yes - p.935                                                                                                                                                                                                                                                                                                             | Yes - p.666                                                                                                                                                                                                                                                                                                                                                                                         | Yes - p.773-774                                                                                                                                                                                                                                                                                                                                                                                                                                               | Yes - p.367                                                                                                                                                                                                                                                                                           | Yes - p.3                                                                                                                                                                                                                                                                                                                          |
| <b>3. Was the participation rate of eligible persons at least 50%?</b>                                                                                                                                                                            | Not applicable - retrospective study                                                                                                                                                                                                                                                                                    | Not applicable - retrospective study                                                                                                                                                                                                                                                                                                                                                                | Can't determine - out of 96 practices 71 agreed to participate (p.775), however of those patients prescribed long-term antidepressants only 2849 out of 15689 were reviewed and had forms submitted by their GP (p.775).                                                                                                                                                                                                                                      | Not applicable - study was two armed RCT of which one arm was relevant for review. Participation rate of eligible participants in whole RCT was 49% (p.369).                                                                                                                                          | Yes - In total, 15 women were screened from July 2009 to June 2011, and 12 participants were enrolled. Three of the screened participants were ineligible for the study because of failure to establish Major Depressive Disorder (MDD) as the primary Axis I diagnosis (p.5).                                                     |
| <b>4. Were all the subjects selected or recruited from the same or similar populations (including the same time period)? Were inclusion and exclusion criteria for being in the study prespecified and applied uniformly to all participants?</b> | Can't determine - all patients included in the study had responded well to antidepressant treatment and were evaluated, treated, and followed at the Lucio Bini Mood Disorders Center affiliated with the University of Cagliari in Sardinia (p.935). Unclear over what period of time the patients were selected from. | Yes - patients were treated during the previous five years and were treated in the outpatient clinic of one of two clinics. Unclear if there are important differences between the 2 clinics. However, inclusion criteria were detailed and would mean population was homogenous on important issues such as drug (paroxetine only), and that they had experienced a single episode of MDD (p.666). | Yes - practices came from four of the community health and care partnerships (CHCPs) serving a highly urbanised population within the most deprived areas of Scotland with a high burden of disease and chronic conditions. These four CHCPs were interested in reviewing antidepressant prescribing and were high volume prescribers by defined daily doses (DDDs) per capita from the Prescribing and Information System for Scotland (PRISMS) (p.773-774). | Not applicable - study was two armed RCT of which one arm was relevant for review. Patients were recruited in 12 secondary and tertiary psychiatric out-patient clinics across The Netherlands between September 2009 and January 2012. There were detailed inclusion and exclusion criteria (p.367). | Yes - women were recruited from Massachusetts General Hospital (MGH) Center for Women's Mental Health in Boston, MA, or via a referral from another health care provider within the community, so there might be differences between these populations (p.3). However, there were detailed inclusion and exclusion criteria (p.3). |

|                                                                                                                             | Baldessarini 2010 <sup>52</sup> | Himeiri 2006 <sup>53</sup> | Johnson 2012 <sup>49</sup>                                                               | Huijbers 2016 <sup>34</sup>                                                                                                                                                         | Psaros 2014 <sup>50</sup>                                                                                                                                                                                                                                                                                                                                                                                                                                                                                                                                                                                                                                                                                                            |
|-----------------------------------------------------------------------------------------------------------------------------|---------------------------------|----------------------------|------------------------------------------------------------------------------------------|-------------------------------------------------------------------------------------------------------------------------------------------------------------------------------------|--------------------------------------------------------------------------------------------------------------------------------------------------------------------------------------------------------------------------------------------------------------------------------------------------------------------------------------------------------------------------------------------------------------------------------------------------------------------------------------------------------------------------------------------------------------------------------------------------------------------------------------------------------------------------------------------------------------------------------------|
| <b>5. Was a sample size justification, power description, or variance and effect estimates provided?</b>                    | Not reported                    | Not reported               | Yes - p.774                                                                              | Not applicable - study was two armed RCT of which one arm was relevant for review. Sample size calculation for whole RCT was 280 in total (n = 140 per group) (p.4, Huijbers 2012). | Not reported - but following issues of sample size are mentioned in the paper:<br>1. "Although significance testing could not be completed because of the small sample size, there were some apparent differences between those participants who did and did not relapse" (p.7).<br>2. "Although the sample size and study design preclude us from drawing conclusions about this observed relationship, women with infertility or difficulty conceiving may be especially vulnerable to depressive recurrence and, as a result, may require more intensive monitoring and intervention" (p.7).<br>3. "The nonrandomized design and small sample size do not allow for conclusions around the causality of treatment effects" (p.7). |
| <b>6. For the analyses in this paper, were the exposure(s) of interest measured prior to the outcome(s) being measured?</b> | Yes                             | Yes                        | Not applicable (review and action taken with antidepressant took place at the same time) | Yes                                                                                                                                                                                 | Yes                                                                                                                                                                                                                                                                                                                                                                                                                                                                                                                                                                                                                                                                                                                                  |

|                                                                                                                                              | Baldessarini 2010 <sup>52</sup>                                                                                              | Himeiri 2006 <sup>53</sup>            | Johnson 2012 <sup>49</sup>                                                                                                                                                                                                                                                                                                                                                                                                                                                                           | Huijbers 2016 <sup>34</sup>                                                                                                                                                                                                                                                                                                                                                                                                                                                | Psaros 2014 <sup>50</sup>                |
|----------------------------------------------------------------------------------------------------------------------------------------------|------------------------------------------------------------------------------------------------------------------------------|---------------------------------------|------------------------------------------------------------------------------------------------------------------------------------------------------------------------------------------------------------------------------------------------------------------------------------------------------------------------------------------------------------------------------------------------------------------------------------------------------------------------------------------------------|----------------------------------------------------------------------------------------------------------------------------------------------------------------------------------------------------------------------------------------------------------------------------------------------------------------------------------------------------------------------------------------------------------------------------------------------------------------------------|------------------------------------------|
| <b>7. Was the timeframe sufficient so that one could reasonably expect to see an association between exposure and outcome if it existed?</b> | Yes - mean follow up was 2.81 years (SD 3.63). Follow up was every 2-4 months . Follow up was censored at 100 months (p.935) | Yes - the groups are based on outcome | No - limitations of study in discussion are:<br>"The follow-up reviews by CHCP-1 demonstrated further prescribing reductions could be made. However, the 3-month time period is likely too short to assess sustainability of reductions, especially as common mental health problems are relapsing and remitting in nature. Therefore, a 12-month follow-up period with reviews at 3, 6, and 12 months would be more appropriate to assess long-term sustainability of prescribing changes" (p.777). | Yes - "Patients were asked and recommended to withdraw gradually from their antidepressants over a period of 5 weeks, starting after the seventh session of MBCT..... Adherence to the study protocol was defined as attending four or more MBCT sessions, as in previous studies and having fully discontinued mADM before the 6-month follow-up assessment (i.e. within 6 months after baseline and within approximately 3–4 months after the last MBCT session"(p.367). | Yes - reports on 24 weeks of trial (p.5) |

|                                                                                                                                                                                                                         | Baldessarini 2010 <sup>52</sup>                                                                                                          | Himeiri 2006 <sup>53</sup>                                                                                                                                                                                                                           | Johnson 2012 <sup>49</sup>                                        | Huijbers 2016 <sup>34</sup>                                                                                                                                                                                                                                                                                                                                                                                          | Psaros 2014 <sup>50</sup>                                                                                                                                                                                                                                                                                               |
|-------------------------------------------------------------------------------------------------------------------------------------------------------------------------------------------------------------------------|------------------------------------------------------------------------------------------------------------------------------------------|------------------------------------------------------------------------------------------------------------------------------------------------------------------------------------------------------------------------------------------------------|-------------------------------------------------------------------|----------------------------------------------------------------------------------------------------------------------------------------------------------------------------------------------------------------------------------------------------------------------------------------------------------------------------------------------------------------------------------------------------------------------|-------------------------------------------------------------------------------------------------------------------------------------------------------------------------------------------------------------------------------------------------------------------------------------------------------------------------|
| <b>8. For exposures that can vary in amount or level, did the study examine different levels of the exposure as related to the outcome (e.g., categories of exposure, or exposure measured as continuous variable)?</b> | No - discontinuation was rapid (1-7 days) or gradual ( $\geq 2$ weeks)                                                                   | Not applicable - groups were based on outcome. In regard to tapering, the clinics only used one type of tapering strategy (a second one was later used to help patients in the discontinuation syndrome group successfully withdraw from paroxetine) | Not applicable                                                    | Yes - data for relevant study arm were provided for intention to treat population and per-protocol population (Adherence to the study protocol was defined as attending four or more MBCT sessions, as in previous studies, and having fully discontinued mADM before the 6-month follow-up assessment (i.e. within 6 months after baseline and within approximately 3–4 months after the last MBCT session) (p.367) | Not applicable                                                                                                                                                                                                                                                                                                          |
| <b>9. Were the exposure measures (independent variables) clearly defined, valid, reliable, and implemented consistently across all study participants?</b>                                                              | Yes - excluded those patients whose rate of discontinuation was uncertain (22.3% of potential antidepressant-treated candidates) (p.935) | Not applicable - groups were based on outcome. Outcomes of discontinuation syndrome or non-discontinuation syndrome were clearly defined.                                                                                                            | Yes                                                               | Not applicable - study was two armed RCT of which one arm was relevant for review.                                                                                                                                                                                                                                                                                                                                   | Yes                                                                                                                                                                                                                                                                                                                     |
| <b>10. Was the exposure(s) assessed more than once over time?</b>                                                                                                                                                       | Not applicable                                                                                                                           | Not applicable                                                                                                                                                                                                                                       | No - intervention was 1 GP review                                 | Not applicable                                                                                                                                                                                                                                                                                                                                                                                                       | Yes - For quality assurance, all sessions were audiotaped (p5)                                                                                                                                                                                                                                                          |
| <b>11. Were the outcome measures (dependent variables) clearly defined, valid, reliable, and implemented consistently across all study participants?</b>                                                                | Yes - first new episode of major depression or panic disorder that met DSM-IV diagnostic criteria at clinical assessment.(p.935)         | Not applicable - groups were based on outcome.                                                                                                                                                                                                       | Yes - GPs had standardised form with outcomes to complete (p.774) | Yes - "The primary outcome measure was relapse/recurrence as measured with the SCID-I by trained research assistants every 3 months during the follow-up period" (p.367).                                                                                                                                                                                                                                            | Yes - All assessments were performed by a research assistant or trained study clinicians. The research assistants were trained by the study psychologist on how to conduct and assess psychiatric interviews and questionnaires. Assessments were scripted, and training included mock interviews and assessments.(p.5) |

|                                                                                                                                                                  | Baldessarini 2010 <sup>52</sup>              | Himeiri 2006 <sup>53</sup>                                                                                                                                                                                                  | Johnson 2012 <sup>49</sup>                                                                                                                                                                                                                                                                                                                                                                | Huijbers 2016 <sup>34</sup>                                                                                                                                                        | Psaros 2014 <sup>50</sup>                                                                                                                                                                   |
|------------------------------------------------------------------------------------------------------------------------------------------------------------------|----------------------------------------------|-----------------------------------------------------------------------------------------------------------------------------------------------------------------------------------------------------------------------------|-------------------------------------------------------------------------------------------------------------------------------------------------------------------------------------------------------------------------------------------------------------------------------------------------------------------------------------------------------------------------------------------|------------------------------------------------------------------------------------------------------------------------------------------------------------------------------------|---------------------------------------------------------------------------------------------------------------------------------------------------------------------------------------------|
| <b>12. Were the outcome assessors blinded to the exposure status of participants?</b>                                                                            | Not reported                                 | Not reported                                                                                                                                                                                                                | Not reported                                                                                                                                                                                                                                                                                                                                                                              | No - "The research assistants conducting the assessments could not be masked to treatment group since they were also involved in the practical organisation of the trial" (p.367). | Not reported                                                                                                                                                                                |
| <b>13. Was loss to follow-up after baseline 20% or less?</b>                                                                                                     | Not applicable - retrospective study.        | Not applicable - retrospective study.                                                                                                                                                                                       | Not applicable                                                                                                                                                                                                                                                                                                                                                                            | No - over the course of the trial 28% were lost to follow-up in the relevant study arm (p.369).                                                                                    | Yes - all patients, including 3 women who met study end point completed all relevant sessions and assessments (p.6)                                                                         |
| <b>14. Were key potential confounding variables measured and adjusted statistically for their impact on the relationship between exposure(s) and outcome(s)?</b> | Yes - effect of covariates examined (p.938). | Not applicable - but statistical comparison, between those who experienced discontinuation syndrome and those that did not, of age, sex, maintenance and dosage and duration of treatment with paroxetine was made (p.667). | Yes - Analysis by CHCP was performed (There was significant variation between CHCPs in patients continuing, stopping, reducing, increasing, or changing antidepressants ( $\chi^2 = 30.89$ , 12 df, $P < 0.005$ ). This was attributable to CHCP-1 having fewer patients change antidepressant than CHCPs 2, 3 & 4. There was no significant difference between CHCPs 2, 3 and 4) (p.776) | Yes - depressive symptoms at baseline, and number of depressive episodes in the past (p.368)                                                                                       | Yes - illness characteristics of relapsers versus non relapsers were assessed (number of past episodes of depression, number of past failed attempts to discontinue antidepressants) (p.6). |

|                                    | Baldessarini 2010 <sup>52</sup>                                                                                                                                                                                                                                                                                                                                                                                                                             | Himeiri 2006 <sup>53</sup>                                                                                                                                                            | Johnson 2012 <sup>49</sup>                                     | Huijbers 2016 <sup>34</sup>                                    | Psaros 2014 <sup>50</sup>                                                                                                                                                                                                                                                                                                                                                                                                                                                                                                                                                                                                                                                                                                                                                  |
|------------------------------------|-------------------------------------------------------------------------------------------------------------------------------------------------------------------------------------------------------------------------------------------------------------------------------------------------------------------------------------------------------------------------------------------------------------------------------------------------------------|---------------------------------------------------------------------------------------------------------------------------------------------------------------------------------------|----------------------------------------------------------------|----------------------------------------------------------------|----------------------------------------------------------------------------------------------------------------------------------------------------------------------------------------------------------------------------------------------------------------------------------------------------------------------------------------------------------------------------------------------------------------------------------------------------------------------------------------------------------------------------------------------------------------------------------------------------------------------------------------------------------------------------------------------------------------------------------------------------------------------------|
| <b>15. Any other forms of bias</b> | Can't determine - Conflicts of interest and funding were reported - 2 of the authors had research grants and consultantships with pharma. Research was funded through in part by NIH grant MH-073579 to Drs. Tondo and Baldessarini; the Lucio Bini Private Donors Mood Disorders Research Fund to Dr. Tondo; and a grant from the Bruce J. Anderson Foundation and the McLean Private Donors Psychopharmacology Research Fund to Dr. Baldessarini (p.940). | No - The authors have no conflicts of interest that are directly relevant to the content of this study and no sources of funding were used to assist in conducting the study (p.672). | No - The authors have declared no competing interests (p.778). | No - The authors have declared no competing interests (p.366). | Can't determine - Dr Psaros reports personal fees from Bracket Global. Dr Freeman reports grants from Eli Lilly, Forest, and GlaxoSmithKline; consulting with PamLab; an advisory board position with Takeda/Lundbeck and Otsuka; and medical editing for the Diagnostic and Statistical Manual of Mental Disorders nutritionals. Dr Safren and Ms Barsky have nothing to disclose. Dr Cohen reports grants from AstraZeneca Pharmaceuticals; Bayer HealthCare Pharmaceuticals; Bristol-Myers Squibb; Cephalon, Inc; Forest Laboratories, Inc; GlaxoSmithKline; National Institute on Aging; National Institute of Mental Health; Ortho-McNeil-Janssen; Pfizer, Inc; and Sunovion Pharmaceuticals, Inc. Dr Cohen also reports consultancy with Eli Lilly and Company (p.8) |

**Options:** Yes, no, can't determine, not reported, not applicable

**Abbreviations:** DSM-IV Diagnostic and Statistical Manual of Mental Disorders, 4th. Edition; mADM maintenance antidepressant medication; MBCT mindfulness-based cognitive therapy; p. page number; SCID Structured Clinical Interview for DSM-IV; SD standard deviation

Supplemental Table 5: Studies Reporting Relapse/Recurrence Within 6 Months of Discontinuation

| Study (design)<br>Definition of<br>relapse/recurrence                                                                                           | Intervention<br>(relapse/recurrence<br>rate)                                                                                                                                                                                                                                                                                                                                         | Comparator<br>(relapse/recurrence<br>rate)                                                                          | Results                                                                                                                                                                                                                |
|-------------------------------------------------------------------------------------------------------------------------------------------------|--------------------------------------------------------------------------------------------------------------------------------------------------------------------------------------------------------------------------------------------------------------------------------------------------------------------------------------------------------------------------------------|---------------------------------------------------------------------------------------------------------------------|------------------------------------------------------------------------------------------------------------------------------------------------------------------------------------------------------------------------|
| Depression (exclusion or non-reporting of anxiety comorbidities)                                                                                |                                                                                                                                                                                                                                                                                                                                                                                      |                                                                                                                     |                                                                                                                                                                                                                        |
| Psaros 2014 <sup>50</sup><br>(Single arm)<br><br>Criteria for a current depressive episode according to the MINI, or AD treatment re-initiation | CBT + taper<br>(2/12 = 17%)                                                                                                                                                                                                                                                                                                                                                          | n/a                                                                                                                 | 2 participants relapsed 5 weeks and 10 week after completing AD taper; 1 participant reinitiated AD treatment 1 week after completing AD taper although they did not meet full criteria for a major depressive episode |
| Himeiri 2006 <sup>53</sup><br>(Retrospective cohort)<br><br>DSM-IV criteria                                                                     | 41 patients with discontinuation syndrome after either abrupt (n=27) or gradual (n=14) withdrawal of paroxetine (10mg reduction every 2 weeks) Subsequently, 36/41 re-administered paroxetine and tapered off by 5mg every 2–4 weeks. 5/41 required change of medication, as unable to tolerate adverse effects of paroxetine. 0/41 relapsed 4 and 8 weeks after paroxetine stopped. |                                                                                                                     |                                                                                                                                                                                                                        |
| Depression and/or anxiety disorders                                                                                                             |                                                                                                                                                                                                                                                                                                                                                                                      |                                                                                                                     |                                                                                                                                                                                                                        |
| Baldessarini 2010 <sup>52</sup><br>(Retrospective cohort)<br><br>DSM-IV-TR criteria                                                             | Gradual discontinuation -<br>≥ 2 weeks<br><br>Median time to recurrence (months):<br>MDD: 7.60<br>Panic disorder: 13.2                                                                                                                                                                                                                                                               | Rapid discontinuation –<br>1-7 days<br><br>Median time to recurrence (months):<br>MDD: 3.17<br>Panic disorder: 4.23 | Ratio of occurrence latency (gradual/rapid):<br><br>MDD: 2.40<br>Panic disorder: 3.1                                                                                                                                   |

**Abbreviations:** AD antidepressant; CBT cognitive behavioural therapy; DSM-IV Diagnostic and Statistical Manual of Mental Disorders, 4th. Edition; DSM-IV-TR Diagnostic and Statistical Manual of Mental Disorders, 4th Edition, Text Revision; MDD major depressive disorder; MINI The Mini-International Neuropsychiatric Interview; n/a not applicable

Supplemental Table 6: Studies Reporting Recurrence More Than 6 Months After Discontinuation

| Study (design)<br>Definition of recurrence                                                                      | Timepoint –<br>from baseline | Intervention<br>(recurrence rate)                                    | Comparator<br>(recurrence rate)                            | Risk ratio<br>(95% CI)                                                                                                              |
|-----------------------------------------------------------------------------------------------------------------|------------------------------|----------------------------------------------------------------------|------------------------------------------------------------|-------------------------------------------------------------------------------------------------------------------------------------|
| <b>Depression (exclusion or non-reporting of anxiety comorbidities)</b>                                         |                              |                                                                      |                                                            |                                                                                                                                     |
| Huijbers 2016 <sup>34</sup><br>(Single arm from RCT) <sup>1</sup><br><br>DSM-IV criteria for depressive episode | 15 months                    | MBCT-TS<br>(69/128 = 54%)                                            | n/a                                                        | n/a                                                                                                                                 |
| <b>Depression and/or anxiety disorders</b>                                                                      |                              |                                                                      |                                                            |                                                                                                                                     |
| Eveleigh 2015 <sup>27</sup><br>(RCT) <sup>2</sup><br><br>Severity of symptoms on BSI-53 and CESD                | After 1 year                 | Letter to PCP with recommendation + tapering advice<br>(18/70 = 26%) | Usual care<br>(10/76 = 13%)                                | 1.95 (0.97, 3.94; 1 study)                                                                                                          |
| Fava 1994 <sup>15</sup><br>(RCT) <sup>3</sup><br><br>RDC defined episode of major depression                    | 2 years; 4 years; 6 years    | CBT + taper<br>(3/20 = 15%;<br>7/20 = 35%;<br>10/20 = 50%)           | CM + taper<br>(7/20 = 35%;<br>14/20 = 70%;<br>15/20 = 75%) | 2 years:<br>0.34 (0.18, 0.67; I <sup>2</sup> = 0%; 2 studies)<br><br>6 years:<br>0.55 (0.37, 0.82; I <sup>2</sup> = 11%; 2 studies) |
| Fava 1998 <sup>32</sup><br>(RCT) <sup>4</sup><br><br>RDC defined episode of major depression                    | 2 years; 6 years             | CBT + taper<br>(5/20 = 25%;<br>8/20 = 40%)                           | CM + taper<br>(6/20 = 30%;<br>18/20 = 90%)                 |                                                                                                                                     |
| Kuyken 2008 <sup>16</sup><br>(RCT) <sup>2</sup><br><br>DSM-IV criteria for major depressive disorder            | 15 months                    | MBCT-TS<br>(29/61 = 48%)                                             | m-ADM<br>(37/62 = 60%)                                     | ≥15months:<br><br>0.90 (0.75, 1.07; I <sup>2</sup> = 0%; 2 studies)                                                                 |
| Kuyken 2015 <sup>17</sup><br>(RCT) <sup>2</sup><br><br>SCID-LIFE score of 5 for 2 consecutive weeks at any time | 24 months                    | MBCT-TS<br>(94/212 = 44%)                                            | m-ADM<br>(100/212 = 47%)                                   |                                                                                                                                     |

<sup>1</sup> RCT but only 1 arm is relevant for this review, ITT analysis; <sup>2</sup> ITT analysis; <sup>3</sup> complete case analysis (95% and 91% of those randomised to the intervention and comparator arms respectively); <sup>4</sup> complete case analysis (87% and 91% of those randomised to the intervention and comparator arms respectively)

**Abbreviations:** BSI-53 Brief Symptom Inventory; CESD Centre for Epidemiological Studies Depression Scale; CM clinical management; CBT cognitive behavioural therapy; DSM-IV Diagnostic and Statistical Manual of Mental Disorders, 4th. Edition; ITT intention to treat; m-ADM maintenance antidepressant medication; MBCT-TS Mindfulness based cognitive therapy with support to taper; n/a not applicable; PCP Primary Care Provider; RDC Research Diagnostic Criteria; SCID-LIFE Structured Clinical Interview for DSM-IV - Longitudinal Interval Follow-up Evaluation

Supplemental Table 7: Studies Reporting Quality of Life

| Study (design)                                                          | Measure (Timepoints)                                                                                                                | Intervention                                                                                                                                                                                                                                                                          | Comparator                                                                                                                                                                                                                                                                              | Mean difference (95% CI)                                                                                                                                                                                                                                                                                                                                                   |
|-------------------------------------------------------------------------|-------------------------------------------------------------------------------------------------------------------------------------|---------------------------------------------------------------------------------------------------------------------------------------------------------------------------------------------------------------------------------------------------------------------------------------|-----------------------------------------------------------------------------------------------------------------------------------------------------------------------------------------------------------------------------------------------------------------------------------------|----------------------------------------------------------------------------------------------------------------------------------------------------------------------------------------------------------------------------------------------------------------------------------------------------------------------------------------------------------------------------|
| <b>Depression (exclusion or non-reporting of anxiety comorbidities)</b> |                                                                                                                                     |                                                                                                                                                                                                                                                                                       |                                                                                                                                                                                                                                                                                         |                                                                                                                                                                                                                                                                                                                                                                            |
| Psaros 2014 <sup>50</sup><br>(Single arm)                               | QLESQ<br>Baseline, time of relapse, end of acute phase, at 24 weeks from baseline                                                   | CBT + taper                                                                                                                                                                                                                                                                           |                                                                                                                                                                                                                                                                                         | n/a<br>(see text for results)                                                                                                                                                                                                                                                                                                                                              |
| <b>Depression and/or anxiety disorders</b>                              |                                                                                                                                     |                                                                                                                                                                                                                                                                                       |                                                                                                                                                                                                                                                                                         |                                                                                                                                                                                                                                                                                                                                                                            |
| Eveleigh 2015 <sup>27</sup><br>(RCT) <sup>1</sup>                       | QALY<br>(calculated using EQ-5D)<br>12 months                                                                                       | Letter to PCP with recommendation + tapering advice<br><br>Mean: 0.70; SE: 0.03; SD: 0.25 N: 70                                                                                                                                                                                       | Usual care<br><br>Mean: 0.72; SE: 0.03; SD: 0.26; N: 76                                                                                                                                                                                                                                 | -0.02 (-0.10, 0.06; 1 study)                                                                                                                                                                                                                                                                                                                                               |
| Kuyken 2008 <sup>16</sup><br>(RCT) <sup>2</sup>                         | WHOQOL-BREF (physical; psychological; social; environmental)<br><br>1 month post treatment, 15 months from baseline                 | MBCT-TS<br><br>Physical<br>1 M: mean:24.08; SD: 5.75; N:60<br>15 M: mean: 29.37; SD: 5.28; N: 60<br><br>Psychological<br>1 M: mean: 18.88; SD:3.97; N: 60<br>15 M: mean: 18.61; SD: 3.79; N: 60<br><br>Social<br>1 M: mean: 10.09; SD: 2.15; N: 60<br>15 M: mean: 10; SD: 2.27; N: 60 | m-ADM<br><br>Physical<br>1 M: mean: 22.86; SD: 5.78; N: 59<br>15 M: mean: 22.93; SD: 6.88; N: 59<br><br>Psychological<br>1 M: mean: 17.47; SD:4.82; N: 59<br>15 M: mean: 17.36; SD: 5.58; N: 59<br><br>Social<br>1 M: mean: 9.08; SD: 2.74; N: 59<br>15 M: mean: 9.66 ; SD: 3.06; N: 59 | <b><u>1 month post treatment</u></b><br>Physical:<br>0.20 (-0.68, 1.08; I <sup>2</sup> = 17%; 2 studies)<br><br>Psychological:<br>0.87 (0.33, 1.40; I <sup>2</sup> = 0%; 2 studies)<br><br>Social:<br>0.68 (0.15, 1.22; I <sup>2</sup> = 0%; 2 studies)<br><br><b><u>≥12 months from baseline</u></b><br>Physical:<br>-0.12 (-1.58, 1.34; I <sup>2</sup> = 48%; 2 studies) |
| Kuyken 2015 <sup>17</sup><br>(RCT) <sup>3</sup>                         | EQ-5D, WHOQOL-BREF (Q1 overall perception of health; Q2 overall perception of health; physical; psychological; social; environment) | MBCT-TS<br><br>Physical<br>1 M: mean: 14.3; SD: 3.3; N: 174<br>12 M: mean: 14.1; SD:3.4; N: 166<br><br>Psychological<br>1 M: mean: 13.4; SD:2.6; N: 174<br>12 M: mean: 13.3;                                                                                                          | m-ADM<br><br>Physical<br>1 M: mean: 14.3; SD: 3.0; N: 173<br>12 M: mean: 14.7; SD: 3.3; N: 157<br><br>Psychological<br>1 M: mean: 12.6; SD: 2.8; N: 173<br>12 M: mean: 13.3;                                                                                                            | Psychological:<br>0.36 (-0.75, 1.47; I <sup>2</sup> = 45%; 2 studies)<br><br>Social:<br>-0.01 (-0.59, 0.58; I <sup>2</sup> = 0%; 2 studies)                                                                                                                                                                                                                                |

|  |                                                               |                                                                                                             |                                                                                                               |  |
|--|---------------------------------------------------------------|-------------------------------------------------------------------------------------------------------------|---------------------------------------------------------------------------------------------------------------|--|
|  | 1 month post treatment, 9, 12, 18 and 24 months from baseline | SD: 2.9; N: 166<br><br>Social<br>1 M: mean: 13.8;<br>SD:2.9; N: 174<br>12 M: mean: 13.7;<br>SD: 3.3; N: 169 | SD: 2.7; N: 157<br><br>Social<br>1 M: mean: 13.3 ;<br>SD: 3.4; N: 173<br>12 M: mean: 13.9;<br>SD: 3.5; N: 167 |  |
|--|---------------------------------------------------------------|-------------------------------------------------------------------------------------------------------------|---------------------------------------------------------------------------------------------------------------|--|

<sup>1</sup>ITT analysis; <sup>2</sup> Complete case analysis (1 month post treatment and at 15 months, 98% and 95% of those randomised to the intervention and comparator arms respectively) <sup>3</sup> Complete case analysis (1 month post treatment 82% of those randomised to the intervention and comparator arms, 24 months, 79% and 80% of those randomised to the intervention and comparator arms respectively)

**Abbreviations:** EQ-5D European Quality of Life five dimensions questionnaire; M months; PCP Primary Care Provider; QALY Quality Adjusted Life Years; QLESQ Quality of Life Satisfaction; SD standard deviation; SE standard error; WHOQOL-BREF World Health Organization Quality of Life instrument

Supplemental Table 8: Studies Reporting Reduction in Antidepressant Dosage, Use, or Combination

| Study (design)                                                          | Timepoint – from baseline | Intervention (reduction rate)                               | Comparator (reduction rate) | Other results                                                                                                                                                    |
|-------------------------------------------------------------------------|---------------------------|-------------------------------------------------------------|-----------------------------|------------------------------------------------------------------------------------------------------------------------------------------------------------------|
| <b>Depression (exclusion or non-reporting of anxiety comorbidities)</b> |                           |                                                             |                             |                                                                                                                                                                  |
| Klein 2017 <sup>42</sup> (RCT) <sup>1</sup>                             | 6 months                  | CBT + taper (Minimum 50% reduction of ADM use: 16/85 = 19%) | m-ADM (n/a)                 | n/a                                                                                                                                                              |
| Huijbers 2016 <sup>34</sup> (Single arm from RCT) <sup>2</sup>          | Not reported              | MBCT-TS (Reduction in ADM: 17/128 = 13%)                    | n/a                         | n/a                                                                                                                                                              |
| <b>Depression and/or anxiety disorders</b>                              |                           |                                                             |                             |                                                                                                                                                                  |
| Kuyken 2015 <sup>17</sup> (RCT) <sup>3</sup>                            | 24 months                 | MBCT-TS (Reduction in ADM dose: 29/176 = 16%)               | m-ADM (n/a)                 |                                                                                                                                                                  |
| Johnson 2012 <sup>49</sup> (single arm)                                 | Post intervention         | Guided PCP review (Reduced dose: 366/2849 = 12.8%)          | n/a                         | 9.5% (95% CI = 9.1% to 9.8% P<0.001) reduction in mean PDD, expressed as DDDs. Estimated 8.1% (£23 320 per annum) reduction in antidepressant prescribing costs. |

<sup>1</sup> 3 arm RCT, but only 2 arms are relevant for this review, ITT analysis; <sup>2</sup> RCT but only 1 arm is relevant for this review; ITT analysis; <sup>3</sup> per protocol analysis (completed 4 sessions of MBCT, 83% of those randomised to intervention arm)

**Abbreviations:** ADM antidepressant medication; CBT cognitive behavioural therapy; DDD defined daily doses; m-ADM maintenance antidepressant medication; MBCT-TS Mindfulness based cognitive therapy with support to taper; n/a not applicable; PCP Primary Care Provider, PDD prescribed daily dose.
